# Supplementary material for: Unsymmetrical relay C–H alkenylation and [2 + 2] cycloaddition ofN-arylsydnones with allenyl acetates leading to quinoline-fused cyclobutanes
Source: Royal Society of Chemistry journal article supplement (doi:10.1039/d2qo01795d), 2023-01-01
Supplement: d2qo01795d1.pdf [file d2qo01795d1.pdf]

## Supporting Information

### **Unsymmetrical Relay C–H Alkenylation and [2 + 2] Cycloaddition of *N*-Arylsydnone with Allenyl Acetates Leading to Quinoline Fused Cyclobutanes**

Xia Song, Kelin Wang, Xinying Zhang,\* Xuesen Fan\*

*School of Environment, School of Chemistry and Chemical Engineering, Key Laboratory for Yellow River and  
Huai River Water Environmental Pollution Control, Key Laboratory of Green Chemical Media and Reactions,  
Ministry of Education, NMPA Key Laboratory for Research and Evaluation of Innovative Drug, Collaborative  
Innovation Center of Henan Province for Green Manufacturing of Fine Chemicals, Henan Normal University,*

*Xinxiang, Henan 453007, China*

*E-mail: xinyingzhang@htu.cn; xuesen.fan@htu.cn*

## Table of Contents

|            |                                                |         |
|------------|------------------------------------------------|---------|
| <b>I</b>   | General experimental information               | S3-S3   |
| <b>II</b>  | Experimental procedures and spectroscopic data | S4-S31  |
| <b>III</b> | Mechanistic studies                            | S32-S34 |
| <b>IV</b>  | X-ray crystal structure and data for <b>3a</b> | S35-S36 |
| <b>V</b>   | NMR spectra of <b>3a-300</b>                   | S37-S82 |
| <b>VI</b>  | NMR spectra of <b>4-7</b>                      | S83-S86 |
| <b>VII</b> | References                                     | S87-S87 |

## I. General experimental information

Commercial reagents were used without further purification. *N*-Arylsydnonones (**1**),<sup>[1,2]</sup> allenyl acetates (**2**),<sup>[3]</sup> and [Cp\**RhCl*<sub>2</sub>]<sub>2</sub><sup>[4]</sup> were prepared based on literature procedures. Melting points were recorded with a micro melting point apparatus and uncorrected. The <sup>1</sup>H NMR spectra were recorded at 600 MHz and 400 MHz. The <sup>13</sup>C NMR spectra were recorded at 150 MHz and 100 MHz. The <sup>19</sup>F NMR spectra were recorded at 565 MHz. Chemical shifts were expressed in parts per million ( $\delta$ ), and were reported as s (singlet), d (doublet), t (triplet), dd (doublet of doublet), m (multiplet), etc. The coupling constants *J* were given in Hz. High resolution mass spectra (HRMS) were obtained *via* ESI mode by using a MicrOTOF mass spectrometer. All reactions were monitored by thin layer chromatography (TLC) using silica gel plates (silica gel 60 F254 0.25 mm), and components were visualized by observation under UV light (254 and 365 nm).

## II. Experimental procedures and spectroscopic data

### 1. Typical procedure for the synthesis of 3a and spectroscopic data of 3a-3nn

To a reaction tube equipped with a stir bar were charged with 3-phenyl-1,2,3-oxadiazol-3-ium-5-olate (**1a**, 32.4 mg, 0.2 mmol), DCE (2 mL), [Cp\**Rh*Cl<sub>2</sub>]<sub>2</sub> (3.1 mg, 0.005 mmol), AgOAc (6.7 mg, 0.04 mmol), TEMPO (31.3 mg, 0.2 mmol) and 1-phenylbuta-2,3-dien-1-yl acetate (**2a**, 94.1 mg, 0.5 mmol). The tube was then sealed, and the resulting mixture was stirred at 50 °C under argon for 24 h. Upon completion, it was cooled to room temperature, quenched with water and extracted with dichloromethane for three times. The combined organic phases were dried over anhydrous Na<sub>2</sub>SO<sub>4</sub>, filtered and concentrated under reduced pressure. The residue was purified by silica gel column chromatography using petroleum ether/ethyl acetate (5:1) as eluent to afford **3a**. Other products **3b-3nn** were obtained in a similar manner.

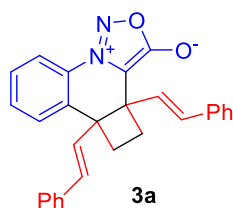

### **3b,5a-Di((E)-styryl)-3b,4,5,5a-tetrahydrocyclobuta[*c*][1,2,3]oxadiazolo[3,4-*a*]quinolin-10-ium-3-olate**

#### **(3a)**

Eluent: petroleum ether/ethyl acetate (5:1). Yellow solid (70.3 mg, 84%), mp 190.0-191.3 °C. <sup>1</sup>H NMR (CDCl<sub>3</sub>, 600 MHz): δ 8.15 (dd, *J*<sub>1</sub> = 7.8 Hz, *J*<sub>2</sub> = 1.2 Hz, 1H), 7.51-7.46 (m, 2H), 7.43 (d, *J* = 7.8 Hz, 2H), 7.35-7.27 (m, 6H), 7.24 (t, *J* = 7.8 Hz, 2H), 7.19 (t, *J* = 7.8 Hz, 1H), 6.79 (d, *J* = 16.2 Hz, 1H), 6.42 (d, *J* = 16.2 Hz, 1H), 6.33 (d, *J* = 16.8 Hz, 1H), 6.22 (d, *J* = 15.6 Hz, 1H), 2.79-2.72 (m, 2H), 2.59-2.54 (m, 1H), 2.36-2.31 (m, 1H). <sup>13</sup>C{<sup>1</sup>H} NMR (CDCl<sub>3</sub>, 150 MHz): δ 166.9, 136.4, 136.3, 134.2, 132.8, 132.3, 132.1, 129.6, 129.4, 129.0, 128.9, 128.62, 128.56, 128.2, 127.9, 127.3, 126.7, 126.6, 117.4, 104.5, 50.2, 45.4, 31.3, 31.1. HRMS (ESI) *m/z*: [M+Na]<sup>+</sup> Calcd for C<sub>28</sub>H<sub>22</sub>N<sub>2</sub>NaO<sub>2</sub> 441.1573; Found 441.1557.



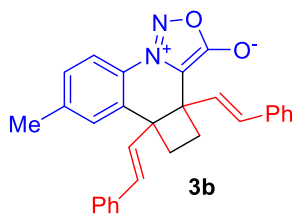

**7-Methyl-3b,5a-di((E)-styryl)-3b,4,5,5a-tetrahydrocyclobuta[c][1,2,3]oxadiazolo[3,4-a]quinolin-10-ium-3-olate (3b)**

Eluent: petroleum ether/ethyl acetate (5:1). Yellow solid (64.9 mg, 75%), mp 164.6-165.9 °C.  $^1\text{H}$  NMR ( $\text{CDCl}_3$ , 600 MHz):  $\delta$  8.03 (d,  $J = 8.4$  Hz, 1H), 7.44 (d,  $J = 7.2$  Hz, 2H), 7.34 (t,  $J = 7.8$  Hz, 2H), 7.31-7.28 (m, 3H), 7.27-7.21 (m, 3H), 7.18 (d,  $J = 7.2$  Hz, 1H), 7.09 (s, 1H), 6.79 (d,  $J = 16.2$  Hz, 1H), 6.41 (d,  $J = 16.2$  Hz, 1H), 6.33 (d,  $J = 16.2$  Hz, 1H), 6.22 (d,  $J = 15.6$  Hz, 1H), 2.77-2.69 (m, 2H), 2.57-2.52 (m, 1H), 2.36 (s, 3H), 2.32-2.29 (m, 1H).  $^{13}\text{C}\{^1\text{H}\}$  NMR ( $\text{CDCl}_3$ , 150 MHz):  $\delta$  167.0, 142.9, 136.42, 136.37, 134.0, 132.7, 132.1, 129.6, 129.3, 129.1, 128.9, 128.5, 128.2, 127.9, 127.4, 127.3, 126.73, 126.68, 117.2, 104.2, 50.3, 45.4, 31.2, 31.0, 21.6. HRMS (ESI)  $m/z$ :  $[\text{M}+\text{Na}]^+$  Calcd for  $\text{C}_{29}\text{H}_{24}\text{N}_2\text{NaO}_2$  455.1730; Found 455.1721.

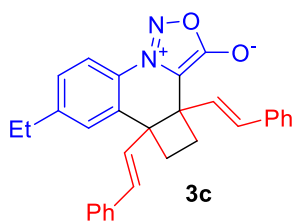

**7-Ethyl-3b,5a-di((E)-styryl)-3b,4,5,5a-tetrahydrocyclobuta[c][1,2,3]oxadiazolo[3,4-a]quinolin-10-ium-3-olate (3c)**

Eluent: petroleum ether/ethyl acetate (5:1). Yellow solid (69.7 mg, 78%), mp 177.4-178.3 °C.  $^1\text{H}$  NMR ( $\text{CDCl}_3$ , 600 MHz):  $\delta$  8.06 (d,  $J = 8.4$  Hz, 1H), 7.44 (d,  $J = 7.8$  Hz, 2H), 7.35 (t,  $J = 7.8$  Hz, 2H), 7.31-7.28 (m, 4H), 7.24 (t,  $J = 7.8$  Hz, 2H), 7.20-7.17 (m, 1H), 7.11 (d,  $J = 1.2$  Hz, 1H), 6.80 (d,  $J = 16.2$  Hz, 1H), 6.41 (d,  $J = 16.2$  Hz, 1H), 6.34 (d,  $J = 16.8$  Hz, 1H), 6.22 (d,  $J = 15.6$  Hz, 1H), 2.78-2.71 (m, 2H), 2.65 (q,  $J = 7.8$  Hz, 2H), 2.58-2.53 (m, 1H), 2.36-2.30 (m, 1H), 1.21 (t,  $J = 7.8$  Hz, 3H).  $^{13}\text{C}\{^1\text{H}\}$  NMR ( $\text{CDCl}_3$ , 150 MHz):  $\delta$  167.0, 149.1, 136.4, 134.1, 132.7, 132.1, 129.2, 128.9, 128.53, 128.48, 128.2, 128.1, 127.9, 127.5, 127.4,

126.73, 126.67, 117.3, 104.2, 50.3, 45.5, 31.2, 31.0, 28.9, 15.3. HRMS (ESI)  $m/z$ :  $[M+Na]^+$  Calcd for  $C_{30}H_{26}N_2NaO_2$  469.1886; Found 469.1889.

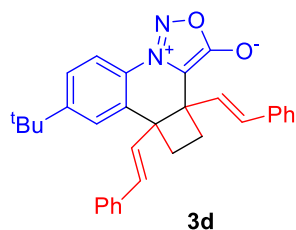

**7-(*tert*-Butyl)-3b,5a-di(*E*)-styryl)-3b,4,5,5a-tetrahydrocyclobuta[*c*][1,2,3]oxadiazolo[3,4-*a*]quinolin-10-ium-3-olate (3d)**

Eluent: petroleum ether/ethyl acetate (5:1). Yellow solid (68.3 mg, 72%), mp 106.3-107.3 °C.  $^1H$  NMR ( $CDCl_3$ , 600 MHz):  $\delta$  8.07 (d,  $J = 8.4$  Hz, 1H), 7.50 (dd,  $J_1 = 9.0$  Hz,  $J_2 = 2.4$  Hz, 1H), 7.43 (d,  $J = 7.2$  Hz, 2H), 7.35 (t,  $J = 7.8$  Hz, 2H), 7.31-7.28 (m, 4H), 7.26-7.23 (m, 2H), 7.19 (t,  $J = 7.2$  Hz, 1H), 6.78 (d,  $J = 16.2$  Hz, 1H), 6.41 (d,  $J = 15.6$  Hz, 1H), 6.34 (d,  $J = 16.2$  Hz, 1H), 6.22 (d,  $J = 15.6$  Hz, 1H), 2.78-2.72 (m, 2H), 2.59-2.56 (m, 1H), 2.37-2.32 (m, 1H), 1.29 (s, 9H).  $^{13}C\{^1H\}$  NMR ( $CDCl_3$ , 150 MHz):  $\delta$  167.0, 155.9, 136.44, 136.37, 133.7, 132.7, 132.2, 129.3, 128.9, 128.5, 128.1, 127.8, 127.4, 127.2, 126.7, 126.6, 125.9, 125.8, 117.0, 104.2, 50.5, 45.5, 35.3, 31.21, 31.17, 31.08. HRMS (ESI)  $m/z$ :  $[M+Na]^+$  Calcd for  $C_{32}H_{30}N_2NaO_2$  497.2199; Found 497.2194.

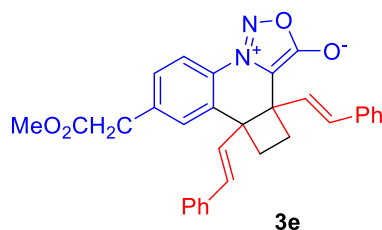

**7-(2-Methoxy-2-oxoethyl)-3b,5a-di(*E*)-styryl)-3b,4,5,5a-tetrahydrocyclobuta[*c*][1,2,3]oxadiazolo[3,4-*a*]quinolin-10-ium-3-olate (3e)**

Eluent: petroleum ether/ethyl acetate (5:1). Yellow solid (64.8 mg, 66%), mp 80.6-81.7 °C.  $^1H$  NMR ( $CDCl_3$ , 600 MHz):  $\delta$  8.12 (d,  $J = 8.4$  Hz, 1H), 7.44-7.41 (m, 3H), 7.35 (t,  $J = 7.8$  Hz, 2H), 7.31-7.28 (m, 3H), 7.26-7.23 (m, 2H), 7.21-7.18 (m, 2H), 6.80 (d,  $J = 16.2$  Hz, 1H), 6.41 (d,  $J = 16.2$  Hz, 1H), 6.32 (d,  $J = 16.2$

Hz, 1H), 6.21 (d,  $J = 15.6$  Hz, 1H), 3.67 (s, 3H), 3.64 (s, 2H), 2.79-2.71 (m, 2H), 2.58-2.54 (m, 1H), 2.37-2.31 (m, 1H).  $^{13}\text{C}\{^1\text{H}\}$  NMR ( $\text{CDCl}_3$ , 150 MHz):  $\delta$  170.9, 166.9, 138.5, 136.3, 136.2, 134.4, 132.9, 132.4, 130.2, 129.7, 128.9, 128.8, 128.64, 128.56, 128.3, 127.9, 127.2, 126.74, 126.70, 117.6, 104.4, 52.4, 50.2, 45.5, 40.8, 31.3, 31.0. HRMS (ESI)  $m/z$ :  $[\text{M}+\text{Na}]^+$  Calcd for  $\text{C}_{31}\text{H}_{26}\text{N}_2\text{NaO}_4$  513.1785; Found 513.1776.

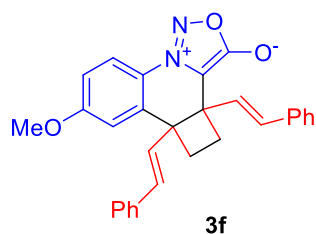

**7-Methoxy-3b,5a-di((E)-styryl)-3b,4,5,5a-tetrahydrocyclobuta[c][1,2,3]oxadiazolo[3,4-a]quinolin-10-ium-3-olate (3f)**

Eluent: petroleum ether/ethyl acetate (5:1). Yellow solid (78.9 mg, 88%), mp 150.1-150.8 °C.  $^1\text{H}$  NMR ( $\text{CDCl}_3$ , 600 MHz):  $\delta$  8.09 (d,  $J = 8.4$  Hz, 1H), 7.43 (d,  $J = 7.8$  Hz, 2H), 7.35-7.27 (m, 5H), 7.25-7.22 (m, 2H), 7.18 (t,  $J = 7.2$  Hz, 1H), 6.96 (dd,  $J_1 = 9.0$  Hz,  $J_2 = 2.4$  Hz, 1H), 6.81-6.78 (m, 2H), 6.41 (d,  $J = 15.6$  Hz, 1H), 6.33 (d,  $J = 16.2$  Hz, 1H), 6.21 (d,  $J = 15.6$  Hz, 1H), 3.79 (s, 3H), 2.76-2.71 (m, 2H), 2.57-2.53 (m, 1H), 2.36-2.31 (m, 1H).  $^{13}\text{C}\{^1\text{H}\}$  NMR ( $\text{CDCl}_3$ , 150 MHz):  $\delta$  166.9, 162.2, 136.4, 136.3, 136.2, 132.7, 132.3, 128.90, 128.86, 128.5, 128.2, 127.9, 127.4, 126.73, 126.65, 122.9, 119.1, 114.2, 113.7, 103.7, 55.8, 50.5, 45.4, 31.1, 31.0. HRMS (ESI)  $m/z$ :  $[\text{M}+\text{Na}]^+$  Calcd for  $\text{C}_{29}\text{H}_{24}\text{N}_2\text{NaO}_3$  471.1679; Found 471.1672.

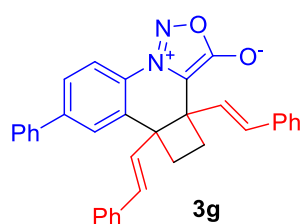

**7-Phenyl-3b,5a-di((E)-styryl)-3b,4,5,5a-tetrahydrocyclobuta[c][1,2,3]oxadiazolo[3,4-a]quinolin-10-ium-3-olate (3g)**

Eluent: petroleum ether/ethyl acetate (5:1). Yellow solid (82.1 mg, 83%), mp 120.2-121.7 °C.  $^1\text{H}$  NMR ( $\text{CDCl}_3$ , 600 MHz):  $\delta$  8.22 (d,  $J = 8.4$  Hz, 1H), 7.68 (dd,  $J_1 = 8.4$  Hz,  $J_2 = 1.8$  Hz, 1H), 7.52-7.51 (m, 3H),

7.44-7.40 (m, 4H), 7.38-7.35 (m, 1H), 7.34-7.31 (m, 4H), 7.28-7.21 (m, 3H), 7.18 (t,  $J = 7.2$  Hz, 1H), 6.83 (d,  $J = 16.2$  Hz, 1H), 6.46 (d,  $J = 16.2$  Hz, 1H), 6.39 (d,  $J = 16.2$  Hz, 1H), 6.24 (d,  $J = 16.2$  Hz, 1H), 2.81-2.76 (m, 2H), 2.60-2.57 (m, 1H), 2.42-2.35 (m, 1H).  $^{13}\text{C}\{^1\text{H}\}$  NMR ( $\text{CDCl}_3$ , 150 MHz):  $\delta$  166.9, 145.3, 139.1, 136.4, 136.3, 134.8, 132.9, 132.5, 129.2, 129.0, 128.9, 128.7, 128.62, 128.59, 128.3, 127.9, 127.7, 127.33, 127.30, 127.2, 126.8, 126.7, 117.9, 104.4, 50.5, 45.6, 31.3, 31.2. HRMS (ESI)  $m/z$ :  $[\text{M}+\text{Na}]^+$  Calcd for  $\text{C}_{34}\text{H}_{26}\text{N}_2\text{NaO}_2$  517.1886; Found 517.1887.

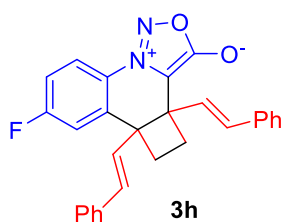

**7-Fluoro-3b,5a-di((E)-styryl)-3b,4,5,5a-tetrahydrocyclobuta[*c*][1,2,3]oxadiazolo[3,4-*a*]quinolin-10-ium-3-olate (3h)**

Eluent: petroleum ether/ethyl acetate (5:1). Yellow solid (59.4 mg, 68%), mp 101.9-102.5 °C.  $^1\text{H}$  NMR ( $\text{CDCl}_3$ , 600 MHz):  $\delta$  8.17 (dd,  $J_1 = 9.0$  Hz,  $J_2 = 3.0$  Hz, 1H), 7.43 (d,  $J = 7.2$  Hz, 2H), 7.35 (t,  $J = 7.8$  Hz, 2H), 7.32-7.29 (m, 3H), 7.26-7.24 (m, 2H), 7.22-7.16 (m, 2H), 7.03 (dd,  $J_1 = 9.0$  Hz,  $J_2 = 3.0$  Hz, 1H), 6.82 (d,  $J = 16.2$  Hz, 1H), 6.41 (d,  $J = 16.2$  Hz, 1H), 6.31 (d,  $J = 16.8$  Hz, 1H), 6.20 (d,  $J = 15.6$  Hz, 1H), 2.79-2.72 (m, 2H), 2.59-2.55 (m, 1H), 2.37-2.32 (m, 1H).  $^{13}\text{C}\{^1\text{H}\}$  NMR ( $\text{CDCl}_3$ , 150 MHz):  $\delta$  166.7, 164.3 (d,  $^1J_{\text{C-F}} = 253.8$  Hz), 137.2 (d,  $^3J_{\text{C-F}} = 7.7$  Hz), 136.1 (d,  $^2J_{\text{C-F}} = 33.9$  Hz), 133.0 (d,  $^2J_{\text{C-F}} = 31.8$  Hz), 129.0, 128.6, 128.5, 128.02, 128.00, 126.9, 126.74, 126.69, 125.8 (d,  $^4J_{\text{C-F}} = 3.3$  Hz), 119.8 (d,  $^3J_{\text{C-F}} = 9.9$  Hz), 116.3, 116.1, 115.9, 104.3, 50.3, 45.4, 31.3, 31.0.  $^{19}\text{F}$  NMR (565 MHz,  $\text{CDCl}_3$ )  $\delta$ : -105.18 – -105.22 (m). HRMS (ESI)  $m/z$ :  $[\text{M}+\text{Na}]^+$  Calcd for  $\text{C}_{28}\text{H}_{21}\text{FN}_2\text{NaO}_2$  459.1479; Found 459.1474.

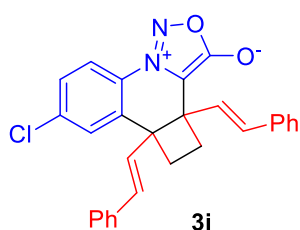

**7-Chloro-3b,5a-di((E)-styryl)-3b,4,5,5a-tetrahydrocyclobuta[c][1,2,3]oxadiazolo[3,4-a]quinolin-10-ium-3-olate (3i)**

Eluent: petroleum ether/ethyl acetate (5:1). Yellow solid (59.8 mg, 66%), mp 167.4-168.5 °C. <sup>1</sup>H NMR (CDCl<sub>3</sub>, 600 MHz): δ 8.10 (d, *J* = 9.0 Hz, 1H), 7.46-7.44 (m, 3H), 7.35 (t, *J* = 7.8 Hz, 2H), 7.31-7.30 (m, 4H), 7.26-7.24 (m, 2H), 7.20 (t, *J* = 7.2 Hz, 1H), 6.82 (d, *J* = 16.2 Hz, 1H), 6.41 (d, *J* = 16.2 Hz, 1H), 6.30 (d, *J* = 16.2 Hz, 1H), 6.19 (d, *J* = 15.6 Hz, 1H), 2.79-7.72 (m, 2H), 2.58-2.54 (m, 1H), 2.36-2.30 (m, 1H). <sup>13</sup>C{<sup>1</sup>H} NMR (CDCl<sub>3</sub>, 150 MHz): δ 166.6, 138.2, 136.2, 136.05, 136.00, 133.2, 132.9, 129.3, 129.0, 128.9, 128.6, 128.5, 128.1, 128.0, 127.9, 126.8, 126.7, 118.9, 104.5, 50.2, 45.5, 31.3, 31.0. HRMS (ESI) *m/z*: [M+Na]<sup>+</sup> Calcd for C<sub>28</sub>H<sub>21</sub>ClN<sub>2</sub>NaO<sub>2</sub> 475.1184; Found 475.1176.

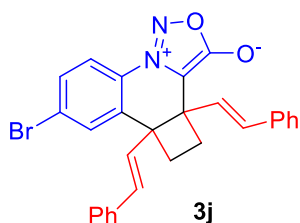

**7-Bromo-3b,5a-di((E)-styryl)-3b,4,5,5a-tetrahydrocyclobuta[c][1,2,3]oxadiazolo[3,4-a]quinolin-10-ium-3-olate (3j)**

Eluent: petroleum ether/ethyl acetate (5:1). Yellow solid (75.6 mg, 76%), mp 117.7-118.1 °C. <sup>1</sup>H NMR (CDCl<sub>3</sub>, 600 MHz): δ 8.03 (d, *J* = 9.0 Hz, 1H), 7.61 (dd, *J*<sub>1</sub> = 9.0 Hz, *J*<sub>2</sub> = 2.4 Hz, 1H), 7.45-7.44 (m, 3H), 7.36 (t, *J* = 7.8 Hz, 2H), 7.32-7.30 (m, 3H), 7.26-7.24 (m, 2H), 7.20 (t, *J* = 7.2 Hz, 1H), 6.82 (d, *J* = 16.2 Hz, 1H), 6.41 (d, *J* = 16.2 Hz, 1H), 6.30 (d, *J* = 16.2 Hz, 1H), 6.18 (d, *J* = 16.2 Hz, 1H), 2.79-2.72 (m, 2H), 2.58-2.54 (m, 1H), 2.36-2.30 (m, 1H). <sup>13</sup>C{<sup>1</sup>H} NMR (CDCl<sub>3</sub>, 150 MHz): δ 166.6, 136.2, 136.1, 136.0, 133.2, 132.9, 132.3, 131.9, 129.0, 128.58, 128.56, 128.45, 128.0, 127.9, 126.8, 126.7, 126.4, 119.0, 104.5, 50.1, 45.5, 31.4, 31.0. HRMS (ESI) *m/z*: [M+Na]<sup>+</sup> Calcd for C<sub>28</sub>H<sub>21</sub>BrN<sub>2</sub>NaO<sub>2</sub> 519.0679; Found 519.0672.

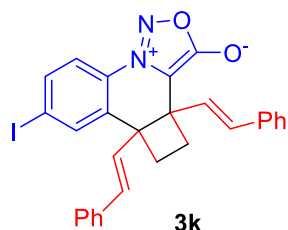

**7-Iodo-3b,5a-di((E)-styryl)-3b,4,5,5a-tetrahydrocyclobuta[c][1,2,3]oxadiazolo[3,4-a]quinolin-10-ium-3-olate (3k)**

Eluent: petroleum ether/ethyl acetate (5:1). Yellow solid (50.1 mg, 46%), mp 146.3-146.8 °C.  $^1\text{H}$  NMR ( $\text{CDCl}_3$ , 600 MHz):  $\delta$  7.87 (d,  $J = 8.4$  Hz, 1H), 7.81 (dd,  $J_1 = 9.0$  Hz,  $J_2 = 1.8$  Hz, 1H), 7.64 (d,  $J = 1.8$  Hz, 1H), 7.44 (d,  $J = 7.2$  Hz, 2H), 7.36 (t,  $J = 7.2$  Hz, 2H), 7.32-7.29 (m, 3H), 7.26-7.23 (m, 2H), 7.21-7.19 (m, 1H), 6.80 (d,  $J = 16.2$  Hz, 1H), 6.40 (d,  $J = 16.2$  Hz, 1H), 6.29 (d,  $J = 16.2$  Hz, 1H), 6.18 (d,  $J = 16.2$  Hz, 1H), 2.79-2.72 (m, 2H), 2.57-2.53 (m, 1H), 2.35-2.27 (m, 1H).  $^{13}\text{C}\{^1\text{H}\}$  NMR ( $\text{CDCl}_3$ , 150 MHz):  $\delta$  166.6, 138.2, 137.8, 136.2, 136.04, 135.99, 133.1, 132.9, 129.2, 129.0, 128.6, 128.4, 128.03, 128.01, 126.9, 126.8, 126.7, 118.8, 104.5, 98.4, 49.9, 45.5, 31.4, 31.0. HRMS (ESI)  $m/z$ :  $[\text{M}+\text{Na}]^+$  Calcd for  $\text{C}_{28}\text{H}_{21}\text{IN}_2\text{NaO}_2$  567.0540; Found 567.0536.

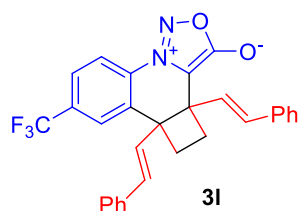

**3b,5a-Di((E)-styryl)-7-(trifluoromethyl)-3b,4,5,5a-tetrahydrocyclobuta[c][1,2,3]oxadiazolo[3,4-a]quinolin-10-ium-3-olate (3l)**

Eluent: petroleum ether/ethyl acetate (5:1). Yellow solid (59.4 mg, 61%), mp 122.4-123.9 °C.  $^1\text{H}$  NMR ( $\text{CDCl}_3$ , 600 MHz):  $\delta$  8.30 (d,  $J = 9.0$  Hz, 1H), 7.75 (dd,  $J_1 = 9.0$  Hz,  $J_2 = 1.8$  Hz, 1H), 7.59 (s, 1H), 7.44 (d,  $J = 7.8$  Hz, 2H), 7.36 (t,  $J = 7.8$  Hz, 2H), 7.32-7.30 (m, 3H), 7.26-7.24 (m, 2H), 7.22-7.19 (m, 1H), 6.85 (d,  $J = 16.2$  Hz, 1H), 6.43 (d,  $J = 16.2$  Hz, 1H), 6.32 (d,  $J = 16.2$  Hz, 1H), 6.20 (d,  $J = 16.2$  Hz, 1H), 2.84-2.77 (m, 2H), 2.61-2.56 (m, 1H), 2.38-2.33 (m, 1H).  $^{13}\text{C}\{^1\text{H}\}$  NMR ( $\text{CDCl}_3$ , 150 MHz):  $\delta$  166.6, 136.1, 135.9, 135.3, 134.0 (q,  $^2J_{\text{C-F}} = 34.1$  Hz), 133.38, 133.35, 131.9, 129.0, 128.6, 128.5, 128.1, 127.7, 126.8, 126.7, 126.62,

126.57, 125.7 (q,  $^3J_{C-F} = 3.3$  Hz), 123.0 (q,  $^1J_{C-F} = 271.4$  Hz), 118.2, 105.1, 50.2, 45.5, 31.4, 31.1.  $^{19}\text{F}$  NMR (565 MHz,  $\text{CDCl}_3$ )  $\delta$ : -62.9 (s). HRMS (ESI)  $m/z$ :  $[\text{M}+\text{Na}]^+$  Calcd for  $\text{C}_{29}\text{H}_{21}\text{F}_3\text{N}_2\text{NaO}_2$  509.1447; Found 509.1447.

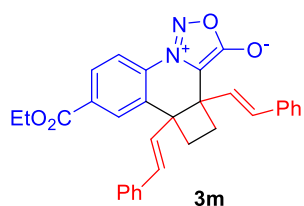

**7-(Ethoxycarbonyl)-3b,5a-di((E)-styryl)-3b,4,5,5a-tetrahydrocyclobuta[c][1,2,3]oxadiazolo[3,4-a]quinolin-10-ium-3-olate (3m)**

Eluent: petroleum ether/ethyl acetate (5:1). Yellow solid (83.4 mg, 85%), mp 92.9-93.8 °C.  $^1\text{H}$  NMR ( $\text{CDCl}_3$ , 600 MHz):  $\delta$  8.23 (d,  $J = 8.4$  Hz, 1H), 8.14 (dd,  $J_1 = 9.0$  Hz,  $J_2 = 1.8$  Hz, 1H), 8.01 (d,  $J = 1.8$  Hz, 1H), 7.43-7.42 (m, 2H), 7.34-7.31 (m, 4H), 7.29-7.27 (m, 1H), 7.25-7.23 (m, 2H), 7.20-7.18 (m, 1H), 6.80 (d,  $J = 16.2$  Hz, 1H), 6.46 (d,  $J = 16.2$  Hz, 1H), 6.33 (d,  $J = 16.2$  Hz, 1H), 6.22 (d,  $J = 16.2$  Hz, 1H), 4.39-4.33 (m, 2H), 2.82-2.77 (m, 2H), 2.58-2.55 (m, 1H), 2.38-2.32 (m, 1H), 1.35 (t,  $J = 7.2$  Hz, 3H).  $^{13}\text{C}\{^1\text{H}\}$  NMR ( $\text{CDCl}_3$ , 150 MHz):  $\delta$  166.6, 164.8, 136.3, 136.2, 134.7, 133.9, 133.1, 133.0, 132.4, 130.9, 129.7, 128.9, 128.6, 128.5, 128.3, 128.0, 126.9, 126.8, 117.5, 105.0, 61.9, 50.2, 45.4, 31.33, 31.25, 14.3. HRMS (ESI)  $m/z$ :  $[\text{M}+\text{Na}]^+$  Calcd for  $\text{C}_{31}\text{H}_{26}\text{N}_2\text{NaO}_4$  513.1785; Found 513.1765.

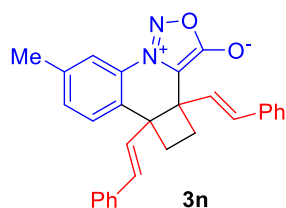

**8-Methyl-3b,5a-di((E)-styryl)-3b,4,5,5a-tetrahydrocyclobuta[c][1,2,3]oxadiazolo[3,4-a]quinolin-10-ium-3-olate (3n)**

Eluent: petroleum ether/ethyl acetate (5:1). Yellow solid (58.8 mg, 68%), mp 190.9-191.4 °C.  $^1\text{H}$  NMR ( $\text{CDCl}_3$ , 600 MHz):  $\delta$  7.97 (s, 1H), 7.42 (d,  $J = 7.2$  Hz, 2H), 7.35-7.29 (m, 6H), 7.28-7.23 (m, 2H), 7.21-7.18 (m, 2H), 6.76 (d,  $J = 16.2$  Hz, 1H), 6.41 (d,  $J = 16.2$  Hz, 1H), 6.32 (d,  $J = 16.2$  Hz, 1H), 6.22 (d,  $J = 16.2$  Hz,

1H), 2.77-2.70 (m, 2H), 2.57-2.53 (m, 1H), 2.45 (s, 3H), 2.33-2.28 (m, 1H).  $^{13}\text{C}\{^1\text{H}\}$  NMR ( $\text{CDCl}_3$ , 150 MHz):  $\delta$  167.0, 139.1, 136.4, 136.3, 132.9, 132.7, 132.1, 131.2, 129.5, 129.23, 129.18, 128.9, 128.5, 128.2, 127.9, 127.3, 126.7, 126.6, 117.6, 104.6, 50.1, 45.4, 31.2, 31.1, 21.2. HRMS (ESI)  $m/z$ :  $[\text{M}+\text{Na}]^+$  Calcd for  $\text{C}_{29}\text{H}_{24}\text{N}_2\text{NaO}_2$  455.1730; Found 455.1726.

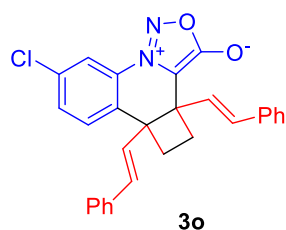

**8-Chloro-3b,5a-di((E)-styryl)-3b,4,5,5a-tetrahydrocyclobuta[c][1,2,3]oxadiazolo[3,4-a]quinolin-10-ium-3-olate (3o)**

Eluent: petroleum ether/ethyl acetate (5:1). Yellow solid (59.8 mg, 66%), mp 111.1-112.2 °C.  $^1\text{H}$  NMR ( $\text{CDCl}_3$ , 600 MHz):  $\delta$  8.17 (d,  $J = 2.4$  Hz, 1H), 7.47 (dd,  $J_1 = 8.4$  Hz,  $J_2 = 1.8$  Hz, 1H), 7.42 (d,  $J = 7.2$  Hz, 2H), 7.35 (t,  $J = 7.2$  Hz, 2H), 7.32-7.29 (m, 4H), 7.28-7.24 (m, 2H), 7.21 (t,  $J = 7.2$  Hz, 1H), 6.78 (d,  $J = 16.2$  Hz, 1H), 6.41 (d,  $J = 16.2$  Hz, 1H), 6.29 (d,  $J = 16.2$  Hz, 1H), 6.19 (d,  $J = 16.2$  Hz, 1H), 2.79-2.72 (m, 2H), 2.59-2.54 (m, 1H), 2.35-2.29 (m, 1H).  $^{13}\text{C}\{^1\text{H}\}$  NMR ( $\text{CDCl}_3$ , 150 MHz):  $\delta$  166.6, 136.2, 136.0, 134.7, 133.1, 132.8, 132.6, 132.1, 130.7, 130.3, 128.9, 128.6, 128.4, 128.3, 128.0, 126.8, 126.7, 126.6, 117.7, 104.8, 50.0, 45.4, 31.3, 31.1. HRMS (ESI)  $m/z$ :  $[\text{M}+\text{Na}]^+$  Calcd for  $\text{C}_{28}\text{H}_{21}\text{ClN}_2\text{NaO}_2$  475.1184; Found 475.1174.

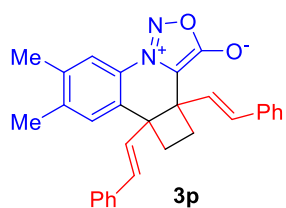

**7,8-Dimethyl-3b,5a-di((E)-styryl)-3b,4,5,5a-tetrahydrocyclobuta[c][1,2,3]oxadiazolo[3,4-a]quinolin-10-ium-3-olate (3p)**

Eluent: petroleum ether/ethyl acetate (5:1). Yellow solid (67.9 mg, 76%), mp 99.1-99.7 °C.  $^1\text{H}$  NMR ( $\text{CDCl}_3$ , 600 MHz):  $\delta$  7.92 (s, 1H), 7.44-7.43 (m, 2H), 7.34 (t,  $J = 7.8$  Hz, 2H), 7.31-7.27 (m, 3H), 7.25-7.22 (m, 2H), 7.19-7.17 (m, 1H), 7.03 (s, 1H), 6.76 (d,  $J = 16.2$  Hz, 1H), 6.40 (d,  $J = 16.2$  Hz, 1H), 6.32 (d,  $J = 16.2$  Hz, 1H),



6.21 (d,  $J = 16.2$  Hz, 1H), 2.76-2.69 (m, 2H), 2.56-2.51 (m, 1H), 2.34 (s, 3H), 2.32-2.27 (m, 1H), 2.26 (s, 3H).

$^{13}\text{C}\{^1\text{H}\}$  NMR ( $\text{CDCl}_3$ , 150 MHz):  $\delta$  167.0, 141.7, 137.7, 136.5, 136.4, 132.6, 131.9, 131.4, 129.9, 129.4, 128.9, 128.5, 128.1, 127.8, 127.5, 127.4, 126.7, 126.6, 117.9, 104.2, 50.0, 45.5, 31.14, 31.08, 20.0, 19.7.

HRMS (ESI)  $m/z$ :  $[\text{M}+\text{Na}]^+$  Calcd for  $\text{C}_{30}\text{H}_{26}\text{N}_2\text{NaO}_2$  469.1886; Found 469.1875.

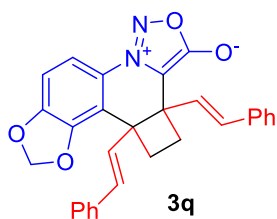

**9c,11a-Di((E)-styryl)-9c,10,11,11a-tetrahydrocyclobuta[*c*][1,3]dioxolo[4,5-*f*][1,2,3]oxadiazolo[3,4-*a*]quinolin-4-ium-1-olate (3q)**

Eluent: petroleum ether/ethyl acetate (5:1). Yellow solid (64.8 mg, 70%), mp 198.5-199.4 °C.  $^1\text{H}$  NMR ( $\text{CDCl}_3$ , 600 MHz):  $\delta$  7.75 (d,  $J = 9.0$  Hz, 1H), 7.38 (d,  $J = 7.2$  Hz, 2H), 7.30-7.25 (m, 6H), 7.22-7.20 (m, 2H), 6.94 (d,  $J = 8.4$  Hz, 1H), 6.74 (d,  $J = 16.2$  Hz, 1H), 6.31-6.23 (m, 3H), 6.03 (d,  $J = 30.0$  Hz, 2H), 2.87-2.81 (m, 1H), 2.72-2.68 (m, 1H), 2.46-2.41 (m, 2H).  $^{13}\text{C}\{^1\text{H}\}$  NMR ( $\text{CDCl}_3$ , 150 MHz):  $\delta$  166.4, 150.6, 146.2, 136.6, 136.5, 132.7, 131.8, 129.1, 128.7, 128.6, 127.9, 127.8, 126.9, 126.5, 126.1, 124.3, 117.6, 111.7, 108.1, 103.3, 102.8, 48.1, 45.2, 31.2, 29.9. HRMS (ESI)  $m/z$ :  $[\text{M}+\text{Na}]^+$  Calcd for  $\text{C}_{29}\text{H}_{22}\text{N}_2\text{NaO}_4$  485.1472; Found 485.1463.

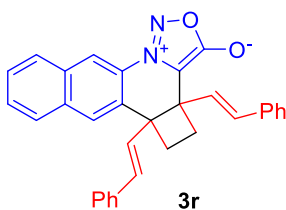

**3b,5a-Di((E)-styryl)-3b,4,5,5a-tetrahydrobenzo[*g*]cyclobuta[*c*][1,2,3]oxadiazolo[3,4-*a*]quinolin-12-ium-3-olate (3r)**

Eluent: petroleum ether/ethyl acetate (5:1). Yellow solid (70.3 mg, 75%), mp 116.1-116.7 °C.  $^1\text{H}$  NMR ( $\text{CDCl}_3$ , 600 MHz):  $\delta$  8.70 (s, 1H), 7.97-7.96 (m, 1H), 7.79-7.77 (m, 1H), 7.74 (s, 1H), 7.59-7.55 (m, 2H), 7.51 (d,  $J = 7.8$  Hz, 2H), 7.38 (t,  $J = 7.8$  Hz, 2H), 7.33-7.29 (m, 3H), 7.24-7.22 (m, 2H), 7.18 (t,  $J = 7.2$  Hz,

1H), 6.95 (d,  $J = 16.2$  Hz, 1H), 6.46 (d,  $J = 16.2$  Hz, 1H), 6.40 (d,  $J = 16.2$  Hz, 1H), 6.25 (d,  $J = 16.2$  Hz, 1H), 2.83-2.73 (m, 2H), 2.60-2.57 (m, 1H), 2.38-2.33 (m, 1H).  $^{13}\text{C}\{^1\text{H}\}$  NMR ( $\text{CDCl}_3$ , 150 MHz):  $\delta$  167.1, 136.4, 136.3, 134.5, 132.9, 132.2, 131.8, 131.0, 129.0, 128.88, 128.86, 128.8, 128.7, 128.6, 128.3, 128.2, 128.0, 127.9, 127.44, 127.36, 126.75, 126.73, 117.0, 105.7, 50.4, 45.9, 31.1, 30.8. HRMS (ESI)  $m/z$ :  $[\text{M}+\text{Na}]^+$  Calcd for  $\text{C}_{32}\text{H}_{24}\text{N}_2\text{NaO}_2$  491.1730; Found 491.1727.

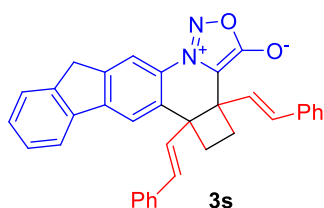

**3b,5a-Di(*E*)-styryl)-3b,4,5a,11-tetrahydro-5*H*-cyclobuta[*c*]indeno[1,2-*g*][1,2,3]oxadiazolo[3,4-*a*]quinolin-13-ium-3-olate (3s)**

Eluent: petroleum ether/ethyl acetate (5:1). Yellow solid (70.9 mg, 70%), mp 141.1-142.5 °C.  $^1\text{H}$  NMR ( $\text{CDCl}_3$ , 600 MHz):  $\delta$  8.33 (s, 1H), 7.74-7.73 (m, 1H), 7.65 (s, 1H), 7.59-7.57 (m, 1H), 7.47 (d,  $J = 7.2$  Hz, 2H), 7.37-7.35 (m, 4H), 7.33-7.30 (m, 3H), 7.26-7.23 (m, 2H), 7.20-7.18 (m, 1H), 6.85 (d,  $J = 16.2$  Hz, 1H), 6.46-6.41 (m, 2H), 6.25 (d,  $J = 16.2$  Hz, 1H), 4.01 (s, 2H), 2.82-2.76 (m, 2H), 2.62-2.58 (m, 1H), 2.41-2.36 (m, 1H).  $^{13}\text{C}\{^1\text{H}\}$  NMR ( $\text{CDCl}_3$ , 150 MHz):  $\delta$  167.0, 145.7, 144.0, 143.5, 139.7, 136.41, 136.40, 133.4, 132.8, 132.2, 129.4, 128.9, 128.54, 128.51, 128.2, 128.0, 127.9, 127.4, 127.3, 126.7, 125.4, 121.0, 120.0, 114.1, 104.4, 50.7, 45.5, 36.9, 31.3, 31.2. HRMS (ESI)  $m/z$ :  $[\text{M}+\text{Na}]^+$  Calcd for  $\text{C}_{35}\text{H}_{26}\text{N}_2\text{NaO}_2$  529.1886; Found 529.1885.

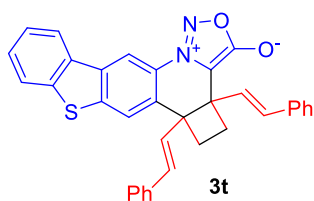

**3b,5a-Di(*E*)-styryl)-3b,4,5,5a-tetrahydrobenzo[4,5]thieno[2,3-*g*]cyclobuta[*c*][1,2,3]oxadiazolo[3,4-*a*]quinolin-13-ium-3-olate (3t)**

Eluent: petroleum ether/ethyl acetate (5:1). Yellow solid (75.5 mg, 72%), mp 154.2-155.8 °C. <sup>1</sup>H NMR (CDCl<sub>3</sub>, 600 MHz): δ 8.91 (s, 1H), 8.24-8.21 (m, 1H), 7.87-7.84 (m, 1H), 7.76 (s, 1H), 7.55-7.53 (m, 2H), 7.49 (d, *J* = 7.2 Hz, 2H), 7.38 (t, *J* = 7.8 Hz, 2H), 7.33-7.31 (m, 3H), 7.26-7.23 (m, 2H), 7.19 (t, *J* = 7.2 Hz, 1H), 6.91 (d, *J* = 16.8 Hz, 1H), 6.45-6.42 (m, 2H), 6.25 (d, *J* = 16.2 Hz, 1H), 2.83-2.76 (m, 2H), 2.63-2.59 (m, 1H), 2.43-2.37 (m, 1H). <sup>13</sup>C{<sup>1</sup>H} NMR (CDCl<sub>3</sub>, 150 MHz): δ 167.0, 143.2, 140.3, 136.3, 136.2, 135.5, 134.4, 133.0, 132.5, 132.3, 129.0, 128.7, 128.6, 128.4, 128.2, 128.0, 127.2, 126.8, 126.7, 125.3, 123.10, 123.08, 122.3, 110.5, 105.0, 50.7, 45.8, 31.3, 31.0. HRMS (ESI) *m/z*: [M+Na]<sup>+</sup> Calcd for C<sub>34</sub>H<sub>24</sub>N<sub>2</sub>NaO<sub>2</sub>S 547.1451; Found 547.1444.

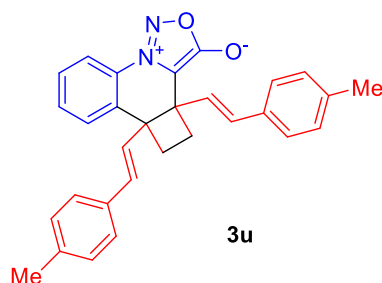

**3b,5a-Bis((*E*)-4-methylstyryl)-3b,4,5,5a-tetrahydrocyclobuta[*c*][1,2,3]oxadiazolo[3,4-*a*]quinolin-10-ium-3-olate (3u)**

Eluent: petroleum ether/ethyl acetate (5:1). Yellow solid (72.3 mg, 81%), mp 187.2-187.7 °C. <sup>1</sup>H NMR (CDCl<sub>3</sub>, 600 MHz): δ 8.15 (dd, *J*<sub>1</sub> = 7.8 Hz, *J*<sub>2</sub> = 1.8 Hz, 1H), 7.50-7.45 (m, 2H), 7.33-7.32 (m, 3H), 7.20 (d, *J* = 8.4 Hz, 2H), 7.15 (d, *J* = 7.8 Hz, 2H), 7.05 (d, *J* = 7.8 Hz, 2H), 6.75 (d, *J* = 16.2 Hz, 1H), 6.36 (d, *J* = 15.6 Hz, 1H), 6.27 (d, *J* = 16.2 Hz, 1H), 6.16 (d, *J* = 15.6 Hz, 1H), 2.77-2.69 (m, 2H), 2.57-2.54 (m, 1H), 2.35 (s, 3H), 2.33-2.30 (m, 4H). <sup>13</sup>C{<sup>1</sup>H} NMR (CDCl<sub>3</sub>, 150 MHz): δ 167.0, 138.2, 137.7, 134.3, 133.6, 133.5, 132.6, 132.1, 132.0, 129.7, 129.6, 129.4, 129.2, 128.5, 127.9, 126.6, 126.5, 126.3, 117.3, 104.7, 50.2, 45.4, 31.4, 31.0, 21.22, 21.21. HRMS (ESI) *m/z*: [M+Na]<sup>+</sup> Calcd for C<sub>30</sub>H<sub>26</sub>N<sub>2</sub>NaO<sub>2</sub> 469.1886; Found 469.1880.

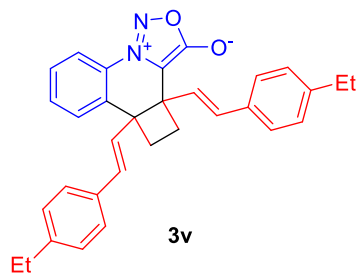

**3b,5a-Bis((E)-4-ethylstyryl)-3b,4,5,5a-tetrahydrocyclobuta[c][1,2,3]oxadiazolo[3,4-a]quinolin-10-ium-3-olate (3v)**

Eluent: petroleum ether/ethyl acetate (5:1). Yellow solid (78.8 mg, 83%), mp 155.5-156.9 °C. <sup>1</sup>H NMR (CDCl<sub>3</sub>, 600 MHz): δ 8.15-8.14 (m, 1H), 7.49-7.45 (m, 2H), 7.36 (d, *J* = 7.8 Hz, 2H), 7.33 (dd, *J*<sub>1</sub> = 7.8 Hz, *J*<sub>2</sub> = 1.8 Hz, 1H), 7.24-7.23 (m, 2H), 7.18 (d, *J* = 7.8 Hz, 2H), 7.08 (d, *J* = 8.4 Hz, 2H), 6.76 (d, *J* = 16.2 Hz, 1H), 6.38 (d, *J* = 16.2 Hz, 1H), 6.29 (d, *J* = 16.2 Hz, 1H), 6.18 (d, *J* = 16.2 Hz, 1H), 2.77-2.70 (m, 2H), 2.65 (q, *J* = 7.8 Hz, 2H), 2.61-2.54 (m, 3H), 2.34-2.28 (m, 1H), 1.24 (t, *J* = 7.8 Hz, 3H), 1.19 (t, *J* = 7.8 Hz, 3H). <sup>13</sup>C{<sup>1</sup>H} NMR (CDCl<sub>3</sub>, 150 MHz): δ 167.0, 144.6, 144.1, 134.3, 133.9, 133.8, 132.7, 132.1, 132.0, 129.7, 129.4, 128.5, 128.4, 128.1, 128.0, 126.74, 126.65, 126.3, 117.3, 104.7, 50.3, 45.4, 31.4, 31.0, 28.7, 28.6, 15.6, 15.5. HRMS (ESI) *m/z*: [M+Na]<sup>+</sup> Calcd for C<sub>32</sub>H<sub>30</sub>N<sub>2</sub>NaO<sub>2</sub> 497.2199; Found 497.2190.

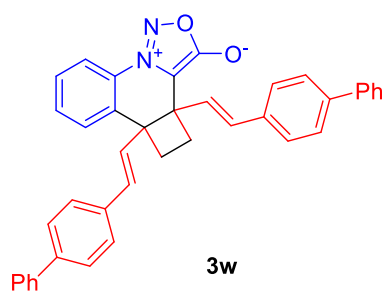

**3b,5a-Bis((E)-2-([1,1'-biphenyl]-4-yl)vinyl)-3b,4,5,5a-tetrahydrocyclobuta[c][1,2,3]oxadiazolo[3,4-a]quinolin-10-ium-3-olate (3w)**

Eluent: petroleum ether/ethyl acetate (5:1). Yellow solid (77.6 mg, 68%), mp 239.8-240.3 °C. <sup>1</sup>H NMR (CDCl<sub>3</sub>, 600 MHz): δ 8.17 (dd, *J*<sub>1</sub> = 8.4 Hz, *J*<sub>2</sub> = 1.8 Hz, 1H), 7.59-7.54 (m, 6H), 7.52-7.47 (m, 6H), 7.44-7.38 (m, 6H), 7.36-7.29 (m, 3H), 6.82 (d, *J* = 16.2 Hz, 1H), 6.48 (d, *J* = 16.2 Hz, 1H), 6.39 (d, *J* = 16.2 Hz, 1H), 6.28 (d, *J* = 16.2 Hz, 1H), 2.82-2.74 (m, 2H), 2.61-2.58 (m, 1H), 2.38-2.33 (m, 1H). <sup>13</sup>C{<sup>1</sup>H} NMR (CDCl<sub>3</sub>,

150 MHz):  $\delta$  166.9, 141.1, 140.65, 140.60, 140.5, 135.4, 135.3, 134.2, 132.4, 132.1, 131.9, 129.7, 129.4, 129.1, 128.9, 128.8, 128.7, 127.59, 127.57, 127.4, 127.3, 127.24, 127.19, 127.1, 127.00, 126.95, 117.4, 104.5, 50.4, 45.5, 31.3, 31.1. HRMS (ESI)  $m/z$ :  $[M+Na]^+$  Calcd for  $C_{40}H_{30}N_2NaO_2$  593.2199; Found 593.2192.

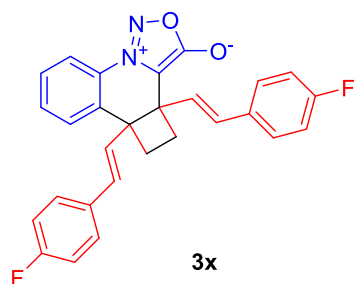

**3b,5a-Bis((E)-4-fluorostyryl)-3b,4,5,5a-tetrahydrocyclobuta[*c*][1,2,3]oxadiazolo[3,4-*a*]quinolin-10-ium-3-olate (3x)**

Eluent: petroleum ether/ethyl acetate (5:1). Yellow solid (64.5 mg, 71%), mp 220.1-220.9 °C.  $^1H$  NMR ( $CDCl_3$ , 600 MHz):  $\delta$  8.17 (dd,  $J_1 = 8.4$  Hz,  $J_2 = 1.8$  Hz, 1H), 7.54-7.48 (m, 2H), 7.39-7.36 (m, 2H), 7.33 (dd,  $J_1 = 7.8$  Hz,  $J_2 = 1.8$  Hz, 1H), 7.29-7.26 (m, 2H), 7.05-7.01 (m, 2H), 6.96-6.93 (m, 2H), 6.72 (d,  $J = 16.2$  Hz, 1H), 6.40 (d,  $J = 16.2$  Hz, 1H), 6.23 (d,  $J = 16.2$  Hz, 1H), 6.12 (d,  $J = 15.6$  Hz, 1H), 2.77-2.71 (m, 2H), 2.58-2.54 (m, 1H), 2.37-2.32 (m, 1H).  $^{13}C\{^1H\}$  NMR ( $CDCl_3$ , 150 MHz):  $\delta$  166.8, 162.7 (d,  $^1J_{C-F} = 247.2$  Hz), 162.5 (d,  $^1J_{C-F} = 246.2$  Hz), 134.1, 132.47 (d,  $^4J_{C-F} = 3.3$  Hz), 132.37 (d,  $^4J_{C-F} = 3.3$  Hz), 132.1, 131.7, 131.2, 129.6, 129.3, 128.8, 128.7, 128.2 (d,  $^3J_{C-F} = 7.7$  Hz), 128.1 (d,  $^3J_{C-F} = 7.7$  Hz), 126.9 (d,  $^5J_{C-F} = 2.3$  Hz), 117.4, 115.8 (d,  $^2J_{C-F} = 21.9$  Hz), 115.5 (d,  $^2J_{C-F} = 20.9$  Hz), 104.3, 50.1, 45.3, 31.15, 31.12.  $^{19}F$  NMR (565 MHz,  $CDCl_3$ )  $\delta$ : -113.25 – -113.30, -113.78 – -113.83 (m). HRMS (ESI)  $m/z$ :  $[M+Na]^+$  Calcd for  $C_{28}H_{20}F_2N_2NaO_2$  477.1385; Found 477.1379.

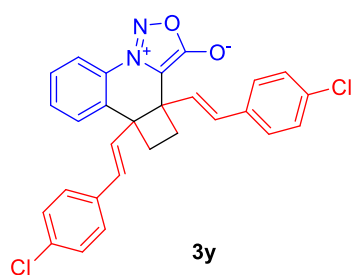

**3b,5a-Bis((E)-4-chlorostyryl)-3b,4,5,5a-tetrahydrocyclobuta[*c*][1,2,3]oxadiazolo[3,4-*a*]quinolin-10-ium-3-olate (3y)**

Eluent: petroleum ether/ethyl acetate (5:1). Yellow solid (74.1 mg, 76%), mp 204.5-205.3 °C. <sup>1</sup>H NMR (CDCl<sub>3</sub>, 600 MHz): 8.16 (d, *J*<sub>1</sub> = 8.4 Hz, *J*<sub>2</sub> = 1.8 Hz, 1H), 7.54-7.48 (m, 2H), 7.33-7.29 (m, 5H), 7.24-7.21 (m, 4H), 6.71 (d, *J* = 15.6 Hz, 1H), 6.40 (d, *J* = 15.6 Hz, 1H), 6.28 (d, *J* = 16.2 Hz, 1H), 6.17 (d, *J* = 16.2 Hz, 1H), 2.76-2.71 (m, 2H), 2.58-2.53 (m, 1H), 2.38-2.31 (m, 1H). <sup>13</sup>C{<sup>1</sup>H} NMR (CDCl<sub>3</sub>, 150 MHz): δ 166.8, 134.8, 134.6, 134.0, 133.9, 133.7, 132.2, 131.7, 131.2, 129.7, 129.6, 129.3, 129.1, 128.8, 128.7, 127.9, 127.74, 127.71, 117.4, 104.1, 50.2, 45.3, 31.2, 31.0. HRMS (ESI) *m/z*: [M+Na]<sup>+</sup> Calcd for C<sub>28</sub>H<sub>20</sub>Cl<sub>2</sub>N<sub>2</sub>NaO<sub>2</sub> 509.0794; Found 509.0788.

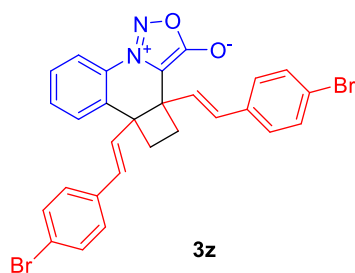

**3b,5a-Bis((E)-4-bromostyryl)-3b,4,5,5a-tetrahydrocyclobuta[*c*][1,2,3]oxadiazolo[3,4-*a*]quinolin-10-ium-3-olate (3z)**

Eluent: petroleum ether/ethyl acetate (5:1). Yellow solid (76.1 mg, 66%), mp 204.5-205.3 °C. <sup>1</sup>H NMR (CDCl<sub>3</sub>, 600 MHz): δ 8.16 (dd, *J*<sub>1</sub> = 8.4 Hz, *J*<sub>2</sub> = 1.8 Hz, 1H), 7.54-7.48 (m, 2H), 7.45 (d, *J* = 8.4 Hz, 2H), 7.37 (d, *J* = 8.4 Hz, 2H), 7.31 (dd, *J*<sub>1</sub> = 7.8 Hz, *J*<sub>2</sub> = 1.8 Hz, 1H), 7.27-7.25 (m, 2H), 7.16 (d, *J* = 8.4 Hz, 2H), 6.69 (d, *J* = 16.2 Hz, 1H), 6.38 (d, *J* = 16.2 Hz, 1H), 6.29 (d, *J* = 16.2 Hz, 1H), 6.18 (d, *J* = 16.2 Hz, 1H), 2.76-2.71 (m, 2H), 2.57-2.53 (m, 1H), 2.38-2.31 (m, 1H). <sup>13</sup>C{<sup>1</sup>H} NMR (CDCl<sub>3</sub>, 150 MHz): δ 166.8, 135.2, 135.1, 133.9, 132.2, 132.0, 131.8, 131.7, 131.3, 129.8, 129.6, 129.3, 128.8, 128.2, 128.0, 127.8, 122.2, 121.8, 117.4, 104.0, 50.2, 45.3, 31.2, 31.0. HRMS (ESI) *m/z*: [M+Na]<sup>+</sup> Calcd for C<sub>28</sub>H<sub>20</sub>Br<sub>2</sub>N<sub>2</sub>NaO<sub>2</sub> 596.9784; Found 596.9782.

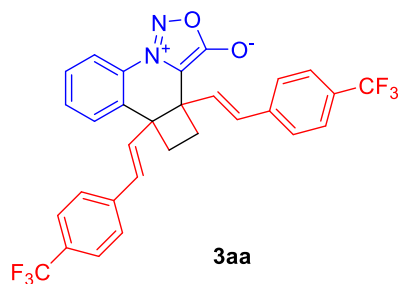

**3b,5a-Bis((E)-4-(trifluoromethyl)styryl)-3b,4,5,5a-tetrahydrocyclobuta[c][1,2,3]oxadiazolo[3,4-a]quinolin-10-ium-3-olate (3aa)**

Eluent: petroleum ether/ethyl acetate (5:1). Yellow solid (58.8 mg, 53%), mp 96.9-97.5 °C. <sup>1</sup>H NMR (CDCl<sub>3</sub>, 600 MHz): δ 8.20-8.18 (m, 1H), 7.59 (d, *J* = 8.4 Hz, 2H), 7.56-7.49 (m, 6H), 7.41 (d, *J* = 7.8 Hz, 2H), 7.33-7.31 (m, 1H), 6.80 (d, *J* = 16.2 Hz, 1H), 6.52 (d, *J* = 16.2 Hz, 1H), 6.42 (d, *J* = 16.2 Hz, 1H), 6.30 (d, *J* = 16.2 Hz, 1H), 2.81-2.75 (m, 2H), 2.62-2.58 (m, 1H), 2.42-2.37 (m, 1H). <sup>13</sup>C{<sup>1</sup>H} NMR (CDCl<sub>3</sub>, 150 MHz): δ 166.7, 139.6, 139.5, 133.6, 132.3, 131.74, 131.68, 131.2, 130.2 (q, <sup>2</sup>*J*<sub>C-F</sub> = 32.9), 129.8 (q, <sup>2</sup>*J*<sub>C-F</sub> = 31.8 Hz), 129.5, 129.4, 129.3, 128.9, 126.8, 126.7, 125.9 (q, <sup>3</sup>*J*<sub>C-F</sub> = 4.4 Hz), 125.6 (q, <sup>3</sup>*J*<sub>C-F</sub> = 4.4 Hz), 124.1 (q, <sup>1</sup>*J*<sub>C-F</sub> = 270.2 Hz), 124.0 (q, <sup>1</sup>*J*<sub>C-F</sub> = 270.2 Hz), 117.5, 103.7, 50.2, 45.4, 31.2, 30.9. <sup>19</sup>F NMR (565 MHz, CDCl<sub>3</sub>) δ: -62.56 (s), -62.60 (s). HRMS (ESI) *m/z*: [M+Na]<sup>+</sup> Calcd for C<sub>30</sub>H<sub>20</sub>F<sub>6</sub>N<sub>2</sub>NaO<sub>2</sub> 577.1321; Found 577.1317.

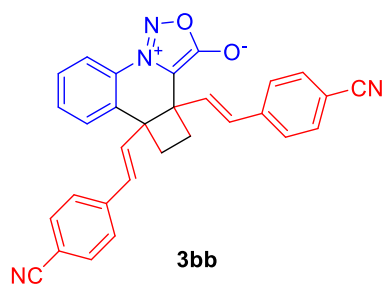

**3b,5a-Bis((E)-4-cyanostyryl)-3b,4,5,5a-tetrahydrocyclobuta[c][1,2,3]oxadiazolo[3,4-a]quinolin-10-ium-3-olate (3bb)**

Eluent: petroleum ether/ethyl acetate (5:1). Yellow solid (57.2 mg, 61%), mp 145.4-146.2 °C. <sup>1</sup>H NMR (CDCl<sub>3</sub>, 600 MHz): δ 8.19 (dd, *J*<sub>1</sub> = 7.8 Hz, *J*<sub>2</sub> = 1.2 Hz, 1H), 7.62 (d, *J* = 8.4 Hz, 2H), 7.58-7.53 (m, 4H), 7.48 (d, *J* = 8.4 Hz, 2H), 7.39 (d, *J* = 8.4 Hz, 2H), 7.31 (dd, *J*<sub>1</sub> = 7.8 Hz, *J*<sub>2</sub> = 1.8 Hz, 1H), 6.76 (d, *J* = 16.2 Hz, 1H), 6.53 (d, *J* = 16.2 Hz, 1H), 6.44 (d, *J* = 16.2 Hz, 1H), 6.34 (d, *J* = 16.2 Hz, 1H), 2.82-2.74 (m, 2H), 2.61-2.57

(m, 1H), 2.44-2.40 (m, 1H).  $^{13}\text{C}\{^1\text{H}\}$  NMR ( $\text{CDCl}_3$ , 150 MHz):  $\delta$  166.6, 140.5, 140.3, 133.4, 133.0, 132.7, 132.5, 132.4, 131.5, 131.1, 130.5, 129.5, 129.3, 129.1, 127.1, 127.0, 118.7, 118.6, 117.5, 111.7, 111.3, 103.3, 50.3, 45.4, 31.4, 30.8. HRMS (ESI)  $m/z$ :  $[\text{M}+\text{Na}]^+$  Calcd for  $\text{C}_{30}\text{H}_{20}\text{N}_4\text{NaO}_2$  491.1478; Found 491.1472.

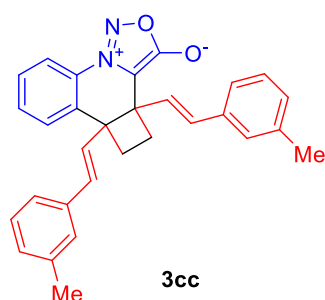

**3b,5a-Bis((E)-3-methylstyryl)-3b,4,5,5a-tetrahydrocyclobuta[c][1,2,3]oxadiazolo[3,4-a]quinolin-10-ium-3-olate (3cc)**

Eluent: petroleum ether/ethyl acetate (5:1). Yellow solid (69.7 mg, 78%), mp 175.2-176.9 °C.  $^1\text{H}$  NMR ( $\text{CDCl}_3$ , 600 MHz):  $\delta$  8.15-8.14 (m, 1H), 7.51-7.45 (m, 2H), 7.33 (dd,  $J_1 = 7.8$  Hz,  $J_2 = 1.8$  Hz, 1H), 7.25-7.21 (m, 3H), 7.15-7.10 (m, 4H), 7.01 (d,  $J = 6.6$  Hz, 1H), 6.76 (d,  $J = 16.2$  Hz, 1H), 6.39 (d,  $J = 16.2$  Hz, 1H), 6.32 (d,  $J = 15.6$  Hz, 1H), 6.21 (d,  $J = 15.6$  Hz, 1H), 2.78-2.71 (m, 2H), 2.58-2.54 (m, 1H), 2.35-2.30 (m, 4H), 2.27 (s, 3H).  $^{13}\text{C}\{^1\text{H}\}$  NMR ( $\text{CDCl}_3$ , 150 MHz):  $\delta$  166.9, 138.5, 138.1, 136.4, 136.3, 134.2, 132.9, 132.3, 132.1, 129.7, 129.4, 129.01, 128.96, 128.8, 128.7, 128.6, 128.4, 127.5, 127.4, 127.2, 123.92, 123.87, 117.3, 104.6, 50.3, 45.4, 31.2, 31.0, 21.40, 21.35. HRMS (ESI)  $m/z$ :  $[\text{M}+\text{Na}]^+$  Calcd for  $\text{C}_{30}\text{H}_{26}\text{N}_2\text{NaO}_2$  469.1886; Found 469.1877.

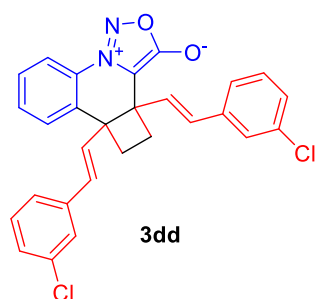

**3b,5a-Bis((E)-3-chlorostyryl)-3b,4,5,5a-tetrahydrocyclobuta[c][1,2,3]oxadiazolo[3,4-a]quinolin-10-ium-3-olate (3dd)**



Eluent: petroleum ether/ethyl acetate (5:1). Yellow solid (69.2 mg, 71%), mp 184.2-185.3 °C. <sup>1</sup>H NMR (CDCl<sub>3</sub>, 600 MHz): δ 8.16 (dd, *J*<sub>1</sub> = 7.8 Hz, *J*<sub>2</sub> = 1.2 Hz, 1H), 7.55-7.49 (m, 2H), 7.39 (s, 1H), 7.32-7.30 (m, 2H), 7.28-7.24 (m, 3H), 7.19-7.17 (m, 3H), 6.71 (d, *J* = 16.2 Hz, 1H), 6.41 (d, *J* = 16.2 Hz, 1H), 6.32 (d, *J* = 16.2 Hz, 1H), 6.21 (d, *J* = 16.2 Hz, 1H), 2.77-2.72 (m, 2H), 2.58-2.55 (m, 1H), 2.39-2.33 (m, 1H). <sup>13</sup>C{<sup>1</sup>H} NMR (CDCl<sub>3</sub>, 150 MHz): δ 166.7, 138.1, 138.0, 134.9, 134.5, 133.8, 132.2, 131.7, 131.2, 130.6, 130.1, 129.8, 129.5, 129.3, 128.8, 128.5, 128.2, 127.9, 126.7, 126.6, 124.9, 124.7, 117.4, 103.9, 50.2, 45.3, 31.2, 30.9. HRMS (ESI) *m/z*: [M+Na]<sup>+</sup> Calcd for C<sub>28</sub>H<sub>20</sub>Cl<sub>2</sub>N<sub>2</sub>NaO<sub>2</sub> 509.0794; Found 509.0788.

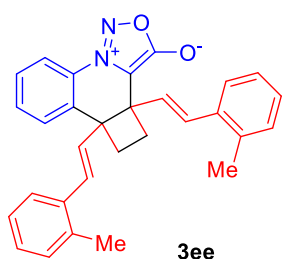

**3b,5a-Bis((*E*)-2-methylstyryl)-3b,4,5,5a-tetrahydrocyclobuta[*c*][1,2,3]oxadiazolo[3,4-*a*]quinolin-10-ium-3-olate (3ee)**

Eluent: petroleum ether/ethyl acetate (5:1). Yellow solid (62.5 mg, 70%), mp 180.2-181.5 °C. <sup>1</sup>H NMR (CDCl<sub>3</sub>, 600 MHz): δ 8.16 (dd, *J*<sub>1</sub> = 7.8 Hz, *J*<sub>2</sub> = 1.2 Hz, 1H), 7.53 (td, *J*<sub>1</sub> = 7.8 Hz, *J*<sub>2</sub> = 1.8 Hz, 1H), 7.48 (td, *J*<sub>1</sub> = 8.4 Hz, *J*<sub>2</sub> = 1.8 Hz, 1H), 7.43 (d, *J* = 7.2 Hz, 1H), 7.38 (dd, *J*<sub>1</sub> = 7.8 Hz, *J*<sub>2</sub> = 1.8 Hz, 1H), 7.33 (d, *J* = 7.8 Hz, 1H), 7.20-7.18 (m, 2H), 7.16-7.06 (m, 4H), 6.99 (d, *J* = 16.2 Hz, 1H), 6.70 (d, *J* = 16.2 Hz, 1H), 6.21 (d, *J* = 16.2 Hz, 1H), 6.07 (d, *J* = 15.6 Hz, 1H), 2.81-2.76 (m, 2H), 2.60-2.57 (m, 1H), 2.39 (s, 3H), 2.38-2.34 (m, 1H), 2.27 (s, 3H). <sup>13</sup>C{<sup>1</sup>H} NMR (CDCl<sub>3</sub>, 150 MHz): δ 166.8, 135.9, 135.61, 135.58, 134.3, 132.1, 131.2, 130.8, 130.5, 130.3, 130.2, 129.7, 129.4, 128.6, 128.4, 128.1, 127.8, 126.4, 126.06, 126.03, 125.98, 117.3, 104.4, 50.2, 45.5, 31.4, 31.1, 19.9, 19.8. HRMS (ESI) *m/z*: [M+Na]<sup>+</sup> Calcd for C<sub>30</sub>H<sub>26</sub>N<sub>2</sub>NaO<sub>2</sub> 469.1886; Found 469.1884.

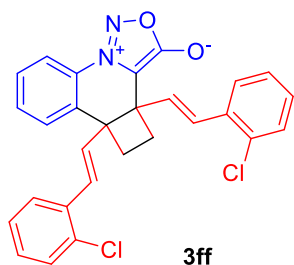

**3b,5a-Bis((E)-2-chlorostyryl)-3b,4,5,5a-tetrahydrocyclobuta[*c*][1,2,3]oxadiazolo[3,4-*a*]quinolin-10-ium-3-olate (3ff)**

Eluent: petroleum ether/ethyl acetate (5:1). Yellow solid (74.1 mg, 76%), mp 170.3-171.4 °C. <sup>1</sup>H NMR (CDCl<sub>3</sub>, 600 MHz): δ 8.17 (dd, *J*<sub>1</sub> = 8.4 Hz, *J*<sub>2</sub> = 1.2 Hz, 1H), 7.55 (td, *J*<sub>1</sub> = 7.8 Hz, *J*<sub>2</sub> = 1.2 Hz, 1H), 7.51-7.49 (m, 1H), 7.47-7.45 (m, 2H), 7.38 (td, *J*<sub>1</sub> = 7.2 Hz, *J*<sub>2</sub> = 1.2 Hz, 2H), 7.30-7.29 (m, 1H), 7.22-7.17 (m, 2H), 7.16-7.11 (m, 3H), 6.90 (d, *J* = 16.2 Hz, 1H), 6.27 (d, *J* = 16.2 Hz, 1H), 6.21 (d, *J* = 15.6 Hz, 1H), 2.87-2.80 (m, 2H), 2.59-2.55 (m, 1H), 2.41-2.37 (m, 1H). <sup>13</sup>C{<sup>1</sup>H} NMR (CDCl<sub>3</sub>, 150 MHz): δ 166.8, 134.8, 134.7, 134.0, 133.3, 132.3, 132.2, 129.9, 129.8, 129.63, 129.58, 129.5, 129.2, 129.0, 128.9, 128.7, 127.5, 127.2, 127.1, 126.9, 117.3, 104.0, 50.4, 45.4, 31.6, 30.7. HRMS (ESI) *m/z*: [M+Na]<sup>+</sup> Calcd for C<sub>28</sub>H<sub>20</sub>Cl<sub>2</sub>N<sub>2</sub>NaO<sub>2</sub> 509.0794; Found 509.0795.

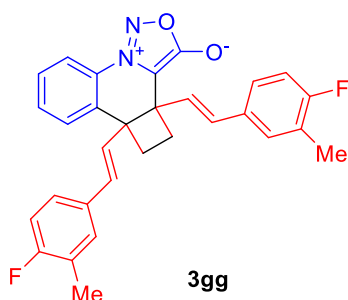

**3b,5a-Bis((E)-4-fluoro-3-methylstyryl)-3b,4,5,5a-tetrahydrocyclobuta[*c*][1,2,3]oxadiazolo[3,4-*a*]quinolin-10-ium-3-olate (3gg)**

Eluent: petroleum ether/ethyl acetate (5:1). Yellow solid (70.4 mg, 73%), mp 209.1-210.0 °C. <sup>1</sup>H NMR (CDCl<sub>3</sub>, 600 MHz): δ 8.15-8.14 (m, 1H), 7.53-7.47 (m, 2H), 7.34 (d, *J*<sub>1</sub> = 7.8 Hz, *J*<sub>2</sub> = 1.2 Hz, 1H), 7.25-7.19 (m, 2H), 7.14 (d, *J* = 7.2 Hz, 1H), 7.11-7.09 (m, 1H), 6.96 (t, *J* = 9.0 Hz, 1H), 6.87 (t, *J* = 9.0 Hz, 1H), 6.70 (d, *J* = 16.2 Hz, 1H), 6.37 (d, *J* = 16.2 Hz, 1H), 6.22 (d, *J* = 16.2 Hz, 1H), 6.11 (d, *J* = 16.2 Hz, 1H), 2.77-2.71 (m,

2H), 2.57-2.52 (m, 1H), 2.36-2.31 (m, 1H), 2.23 (s, 3H), 2.19 (s, 3H).  $^{13}\text{C}\{^1\text{H}\}$  NMR ( $\text{CDCl}_3$ , 150 MHz):  $\delta$  166.9, 161.3 (d,  $^1J_{\text{C-F}} = 245.1$  Hz), 161.1 (d,  $^1J_{\text{C-F}} = 245.1$  Hz), 134.2, 132.3 (d,  $^4J_{\text{C-F}} = 3.3$  Hz), 132.2 (d,  $^4J_{\text{C-F}} = 4.4$  Hz), 132.1, 131.8, 131.3, 129.8 (d,  $^3J_{\text{C-F}} = 5.4$  Hz), 129.7 (d,  $^3J_{\text{C-F}} = 5.6$  Hz), 129.6, 129.4, 128.7, 128.6, 126.8, 125.6 (d,  $^3J_{\text{C-F}} = 7.7$  Hz), 125.5 (d,  $^3J_{\text{C-F}} = 7.7$  Hz), 125.3 (d,  $^2J_{\text{C-F}} = 17.4$  Hz), 124.8 (d,  $^2J_{\text{C-F}} = 17.6$  Hz), 117.3, 115.4 (d,  $^2J_{\text{C-F}} = 23.1$  Hz), 115.1 (d,  $^2J_{\text{C-F}} = 23.0$  Hz), 104.4, 50.2, 45.3, 31.12, 31.05, 14.6 (d,  $^3J_{\text{C-F}} = 3.3$  Hz), 14.5 (d,  $^3J_{\text{C-F}} = 3.3$  Hz).  $^{19}\text{F}$  NMR (565 MHz,  $\text{CDCl}_3$ )  $\delta$ : -117.59 – -117.60 (m), -118.12 – -118.16 (m).

HRMS (ESI)  $m/z$ :  $[\text{M}+\text{Na}]^+$  Calcd for  $\text{C}_{30}\text{H}_{24}\text{F}_2\text{N}_2\text{NaO}_2$  505.1698; Found 505.1697.

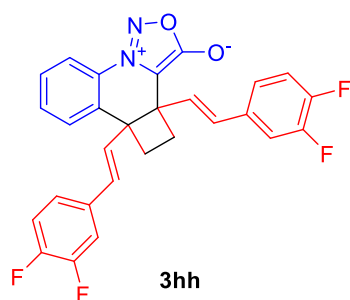

**3b,5a-Bis((E)-3,4-difluorostyryl)-3b,4,5,5a-tetrahydrocyclobuta[*c*][1,2,3]oxadiazolo[3,4-*a*]quinolin-10-ium-3-olate (3hh)**

Eluent: petroleum ether/ethyl acetate (5:1). Yellow solid (54.0 mg, 55%), mp 224.2-225.9 °C.  $^1\text{H}$  NMR ( $\text{DMSO-}d_6$ , 600 MHz):  $\delta$  8.16-8.14 (m, 1H), 7.67-7.64 (m, 1H), 7.62-7.58 (m, 2H), 7.54-7.50 (m, 1H), 7.40-7.32 (m, 4H), 7.25 (br s, 1H), 6.86 (d,  $J = 16.2$  Hz, 1H), 6.54-6.49 (m, 2H), 6.44 (d,  $J = 16.2$  Hz, 1H), 2.76-2.69 (m, 2H), 2.42-2.37 (m, 2H).  $^{13}\text{C}\{^1\text{H}\}$  NMR ( $\text{DMSO-}d_6$ , 150 MHz):  $\delta$  166.3, 150.2 (dd,  $^1J_{\text{C-F}} = 243.9$  Hz,  $^2J_{\text{C-F}} = 21.9$  Hz), 150.1 (d,  $^1J_{\text{C-F}} = 240.6$  Hz), 149.34 (d,  $^1J_{\text{C-F}} = 243.9$  Hz), 149.27 (d,  $^1J_{\text{C-F}} = 245.1$  Hz), 134.9, 134.3, 132.9, 131.5, 129.9, 129.8, 129.72, 129.69, 129.5, 129.2, 124.01, 123.98, 118.1 (d,  $^2J_{\text{C-F}} = 17.6$  Hz), 118.0 (d,  $^2J_{\text{C-F}} = 17.6$  Hz), 117.4, 115.4 (d,  $^2J_{\text{C-F}} = 21.9$  Hz), 115.3 (d,  $^2J_{\text{C-F}} = 21.9$  Hz), 104.4, 50.0, 45.0, 30.8, 29.8.  $^{19}\text{F}$  NMR (565 MHz,  $\text{DMSO-}d_6$ )  $\delta$ : -138.63 – -138.70 (m), -138.76 – -138.84 (m), -139.70 – -139.78(m), -139.84 – -139.92 (m). HRMS (ESI)  $m/z$ :  $[\text{M}+\text{Na}]^+$  Calcd for  $\text{C}_{28}\text{H}_{18}\text{F}_4\text{N}_2\text{NaO}_2$  513.1197; Found 513.1195.

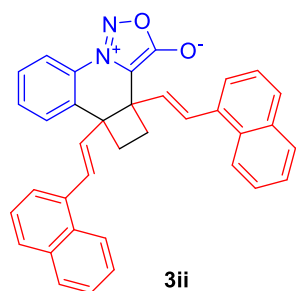

**3b,5a-Bis((E)-2-(naphthalen-1-yl)vinyl)-3b,4,5,5a-tetrahydrocyclobuta[c][1,2,3]oxadiazolo[3,4-a]quinolin-10-ium-3-olate (3ii)**

Eluent: petroleum ether/ethyl acetate (5:1). Yellow solid (98.5 mg, 95%), mp 169.3-170.9 °C. <sup>1</sup>H NMR (CDCl<sub>3</sub>, 600 MHz): δ 8.16 (d, *J* = 7.8 Hz, 1H), 8.09 (d, *J* = 8.4 Hz, 1H), 8.04 (d, *J* = 8.4 Hz, 1H), 7.83 (d, *J* = 8.4 Hz, 1H), 7.77-7.75 (m, 2H), 7.69 (d, *J* = 8.4 Hz, 1H), 7.56-7.44 (m, 7H), 7.41-7.38 (m, 2H), 7.34-7.27 (m, 4H), 6.39 (d, *J* = 15.6 Hz, 1H), 6.26 (d, *J* = 15.6 Hz, 1H), 2.96-2.90 (m, 2H), 2.69-2.64 (m, 1H), 2.46-2.41 (m, 1H). <sup>13</sup>C{<sup>1</sup>H} NMR (CDCl<sub>3</sub>, 150 MHz): δ 167.0, 134.7, 134.4, 134.2, 133.7, 133.5, 132.9, 132.2, 131.3, 131.2, 130.9, 130.4, 130.0, 129.7, 129.5, 128.8, 128.7, 128.6, 128.4, 128.3, 126.5, 126.3, 126.1, 125.9, 125.7, 125.5, 124.5, 124.4, 124.3, 123.7, 117.4, 104.3, 50.5, 45.7, 31.7, 31.2. HRMS (ESI) *m/z*: [M+Na]<sup>+</sup> Calcd for C<sub>36</sub>H<sub>26</sub>N<sub>2</sub>NaO<sub>2</sub> 541.1886; Found 541.1873.

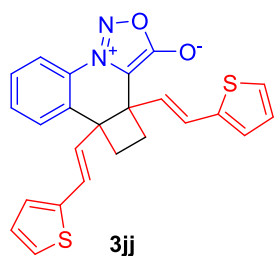

**3b,5a-Bis((E)-2-(thiophen-2-yl)vinyl)-3b,4,5,5a-tetrahydrocyclobuta[c][1,2,3]oxadiazolo[3,4-a]quinolin-10-ium-3-olate (3jj)**

Eluent: petroleum ether/ethyl acetate (5:1). Yellow solid (41.3 mg, 48%), mp 110.0-111.9 °C. <sup>1</sup>H NMR (CDCl<sub>3</sub>, 600 MHz): δ 8.15 (dd, *J*<sub>1</sub> = 8.4 Hz, *J*<sub>2</sub> = 1.8 Hz, 1H), 7.53-7.47 (m, 2H), 7.34 (dd, *J*<sub>1</sub> = 7.8 Hz, *J*<sub>2</sub> = 1.2 Hz, 1H), 7.21 (d, *J* = 4.8 Hz, 1H), 7.12 (dd, *J*<sub>1</sub> = 5.4 Hz, *J*<sub>2</sub> = 1.2 Hz, 1H), 7.06 (d, *J* = 3.6 Hz, 1H), 7.02-7.01 (m, 1H), 6.92-6.89 (m, 3H), 6.52 (d, *J* = 15.6 Hz, 1H), 6.17 (d, *J* = 16.2 Hz, 1H), 6.05 (d, *J* = 16.2 Hz, 1H), 2.74-2.69 (m, 1H), 2.67-2.63 (m, 1H), 2.57-2.53 (m, 1H), 2.34-2.29 (m, 1H). <sup>13</sup>C{<sup>1</sup>H} NMR (CDCl<sub>3</sub>,

150 MHz):  $\delta$  166.9, 141.4, 133.8, 132.1, 129.6, 129.3, 128.7, 128.4, 127.7, 127.4, 126.7, 126.4, 126.0, 125.7, 125.1, 124.8, 117.4, 104.1, 50.3, 45.4, 31.3, 30.9. HRMS (ESI)  $m/z$ :  $[M+Na]^+$  Calcd for  $C_{24}H_{18}N_2NaO_2S_2$  453.0702; Found 453.0699.

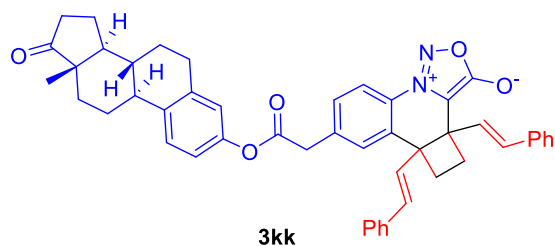

**7-(2-(((8*R*,9*S*,13*S*,14*S*)-13-Methyl-17-oxo-7,8,9,11,12,13,14,15,16,17-decahydro-6*H*-cyclopenta[*a*]phenanthren-3-yl)oxy)-2-oxoethyl)-3*b*,5*a*-di((*E*)-styryl)-3*b*,4,5,5*a*-tetrahydrocyclobuta[*c*][1,2,3]oxadiazolo[3,4-*a*]quinolin-10-ium-3-olate (3kk)**

Eluent: petroleum ether/ethyl acetate (3:1). Yellow solid (99.1 mg, 68%), mp 141.6-142.4 °C.  $^1H$  NMR ( $CDCl_3$ , 600 MHz):  $\delta$  8.16 (d,  $J = 8.4$  Hz, 1H), 7.51 (dd,  $J_1 = 8.4$  Hz,  $J_2 = 1.8$  Hz, 1H), 7.42 (d,  $J = 7.2$  Hz, 2H), 7.34-7.28 (m, 6H), 7.26-7.23 (m, 2H), 7.21-7.18 (m, 2H), 6.79 (d,  $J = 16.2$  Hz, 1H), 6.75-6.72 (m, 2H), 6.42 (d,  $J = 16.2$  Hz, 1H), 6.34 (d,  $J = 16.2$  Hz, 1H), 6.21 (d,  $J = 16.2$  Hz, 1H), 3.87 (s, 2H), 3.72 (t,  $J = 8.4$  Hz, 1H), 2.81-2.73 (m, 3H), 2.59-2.54 (m, 1H), 2.38-2.26 (m, 2H), 2.20-2.07 (m, 2H), 1.96-1.93 (m, 1H), 1.87-1.83 (m, 1H), 1.71-1.66 (m, 1H), 1.52-1.44 (m, 2H), 1.42-1.39 (m, 1H), 1.36-1.33 (m, 1H), 1.30-1.26 (m, 2H), 1.19-1.14 (m, 1H), 0.76 (s, 3H).  $^{13}C\{^1H\}$  NMR ( $CDCl_3$ , 150 MHz):  $\delta$  169.2, 166.9, 148.2, 138.42, 138.39, 138.1, 136.3, 136.2, 134.5, 132.9, 132.5, 130.3, 129.7, 128.9, 128.8, 128.5, 128.3, 127.9, 127.1, 126.73, 126.72, 126.5, 121.2, 118.2, 117.7, 104.5, 81.8, 50.3, 50.1, 45.5, 44.1, 43.2, 41.0, 38.5, 36.7, 31.2, 31.1, 30.6, 29.5, 27.0, 26.2, 23.1, 11.0. HRMS (ESI)  $m/z$ :  $[M+Na]^+$  Calcd for  $C_{48}H_{44}N_2NaO_5$  751.3142; Found 751.3169.

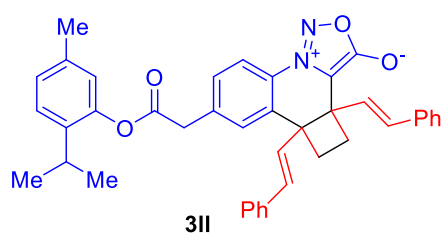

**7-(2-(2-Isopropyl-5-methylphenoxy)-2-oxoethyl)-3b,5a-di((E)-styryl)-3b,4,5,5a-tetrahydrocyclobuta[*c*][1,2,3]oxadiazolo[3,4-*a*]quinolin-10-ium-3-olate (3II)**

Eluent: petroleum ether/ethyl acetate (5:1). Yellow solid (74.3 mg, 61%), mp 86.4-87.1 °C. <sup>1</sup>H NMR (CDCl<sub>3</sub>, 600 MHz): δ 8.17 (d, *J* = 8.4 Hz, 1H), 7.53 (dd, *J*<sub>1</sub> = 8.4 Hz, *J*<sub>2</sub> = 1.8 Hz, 1H), 7.42-7.40 (m, 2H), 7.33-7.30 (m, 5H), 7.29-7.23 (m, 3H), 7.20-7.18 (m, 1H), 7.14 (d, *J* = 7.8 Hz, 1H), 7.00 (d, *J* = 7.8 Hz, 1H), 6.80 (d, *J* = 16.2 Hz, 1H), 6.74 (d, *J* = 0.6 Hz, 1H), 6.42 (d, *J* = 15.6 Hz, 1H), 6.33 (d, *J* = 16.2 Hz, 1H), 6.22 (d, *J* = 16.2 Hz, 1H), 3.90 (s, 2H), 2.80-2.73 (m, 3H), 2.59-2.56 (m, 1H), 2.37-2.32 (m, 1H), 2.26 (s, 3H), 1.05 (t, *J* = 7.2 Hz, 6H). <sup>13</sup>C{<sup>1</sup>H} NMR (CDCl<sub>3</sub>, 150 MHz): δ 169.1, 166.9, 147.7, 138.1, 136.8, 136.7, 136.3, 136.2, 134.6, 133.0, 132.6, 130.4, 129.7, 128.9, 128.8, 128.7, 128.6, 128.3, 128.0, 127.5, 127.1, 126.75, 126.71, 126.5, 122.5, 117.7, 104.5, 50.3, 45.5, 41.1, 31.3, 31.1, 27.1, 22.9, 20.8. HRMS (ESI) *m/z*: [M+Na]<sup>+</sup> Calcd for C<sub>40</sub>H<sub>36</sub>N<sub>2</sub>NaO<sub>4</sub> 631.2567; Found 631.2562.

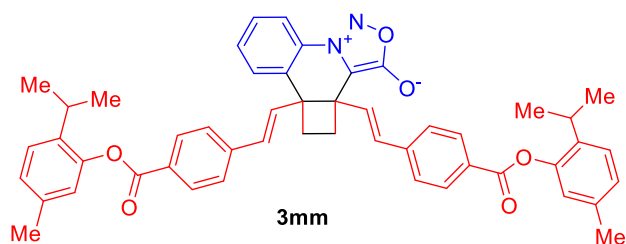

**3b,5a-Bis((E)-4-((2-isopropyl-5-methylphenoxy)carbonyl)styryl)-3b,4,5,5a-tetrahydrocyclobuta[*c*][1,2,3]oxadiazolo[3,4-*a*]quinolin-10-ium-3-olate (3mm)**

Eluent: petroleum ether/ethyl acetate (5:1). Yellow solid (100.2 mg, 65%), mp 128.5-129.9 °C. <sup>1</sup>H NMR (CDCl<sub>3</sub>, 600 MHz): δ 8.20-8.18 (m, 3H), 8.12 (d, *J* = 7.8 Hz, 2H), 7.57-7.51 (m, 4H), 7.47 (d, *J* = 8.4 Hz, 2H), 7.35 (dd, *J*<sub>1</sub> = 7.8 Hz, *J*<sub>2</sub> = 1.2 Hz, 1H), 7.24-7.21 (m, 2H), 7.07-7.04 (m, 2H), 6.92 (d, *J* = 9.0 Hz, 2H), 6.87 (d, *J* = 16.2 Hz, 1H), 6.60 (d, *J* = 16.2 Hz, 1H), 6.52 (d, *J* = 16.2 Hz, 1H), 6.41 (d, *J* = 16.2 Hz, 1H), 3.06-3.00 (m, 2H), 2.85-2.80 (m, 2H), 2.64-2.61 (m, 1H), 2.44-2.40 (m, 1H), 2.33 (s, 3H), 2.32 (s, 3H), 1.21-1.18 (m, 12H). <sup>13</sup>C{<sup>1</sup>H} NMR (CDCl<sub>3</sub>, 150 MHz): δ 166.8, 165.1, 165.0, 148.2, 148.1, 141.3, 141.1, 137.23, 137.18, 136.75, 136.67, 133.7, 132.4, 132.2, 132.1, 131.6, 130.8, 130.6, 130.0, 129.6, 129.3, 129.2, 129.0, 128.9, 137.3, 127.2,

126.9, 126.8, 126.6, 126.5, 122.93, 122.89, 117.5, 103.8, 50.4, 45.5, 31.3, 31.0, 27.4, 27.3, 23.1, 20.92, 20.91.

HRMS (ESI)  $m/z$ :  $[M+H]^+$  Calcd for  $C_{50}H_{47}N_2O_6$  771.3429; Found 771.3419.

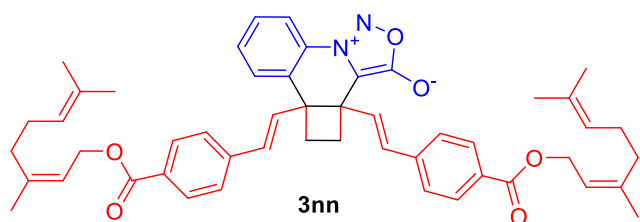

**3b,5a-Bis((E)-4-(((Z)-3,7-dimethylocta-2,6-dien-1-yl)oxy)carbonyl)styryl)-3b,4,5,5a-tetrahydrocyclobut a[c][1,2,3]oxadiazolo[3,4-a]quinolin-10-ium-3-olate (3nn)**

Eluent: petroleum ether/ethyl acetate (5:1). Yellow solid (93.5 mg, 60%), mp 55.3-56.2 °C.  $^1H$  NMR ( $CDCl_3$ , 600 MHz):  $\delta$  8.17 (dd,  $J_1 = 8.4$  Hz,  $J_2 = 1.8$  Hz, 1H), 8.01 (d,  $J = 8.4$  Hz, 2H), 7.93 (d,  $J = 8.4$  Hz, 2H), 7.55-7.49 (m, 2H), 7.45 (d,  $J = 8.4$  Hz, 2H), 7.35 (d,  $J = 9.0$  Hz, 2H), 7.33 (dd,  $J_1 = 7.8$  Hz,  $J_2 = 1.8$  Hz, 1H), 6.81 (d,  $J = 16.2$  Hz, 1H), 6.51 (d,  $J = 16.2$  Hz, 1H), 6.44 (d,  $J = 15.6$  Hz, 1H), 6.33 (d,  $J = 15.6$  Hz, 1H), 5.50-5.46 (m, 2H), 5.13-5.09 (m, 2H), 4.82-4.78 (m, 4H), 2.81-2.76 (m, 2H), 2.60-2.57 (m, 1H), 2.42-2.37 (m, 1H), 2.20-2.16 (m, 4H), 2.13-2.09 (m, 4H), 1.80 (s, 3H), 1.79 (s, 3H), 1.67 (s, 3H), 1.66 (s, 3H), 1.60 (s, 3H), 1.59 (s, 3H).  $^{13}C\{^1H\}$  NMR ( $CDCl_3$ , 150 MHz):  $\delta$  166.8, 166.3, 166.2, 142.8, 142.7, 140.5, 140.3, 133.7, 132.3, 132.22, 132.20, 132.1, 131.7, 131.6, 130.2, 130.1, 130.0, 129.8, 129.53, 129.50, 129.3, 128.8, 126.5, 126.4, 123.6, 119.3, 119.2, 117.4, 103.9, 61.7, 61.6, 50.3, 45.4, 32.25, 32.23, 31.17, 31.0, 26.7, 25.7, 23.6, 23.5, 17.7. HRMS (ESI)  $m/z$ :  $[M+H]^+$  Calcd for  $C_{50}H_{55}N_2O_6$  779.4055; Found 779.4057.

## 2. Structural elaborations of 3a

### 2.1 Synthesis of 4<sup>[5]</sup>

To a reaction tube equipped with a stir bar were charged with **3a** (41.8 mg, 0.1 mmol), toluene (1 mL) and dimethyl but-2-ynedioate (14.8  $\mu$ L, 0.12 mmol). The tube was then sealed, and the resulting mixture was stirred at 115 °C for 12 h. Upon completion, it was quenched with saturated brine and extracted with ethyl acetate for three times. The combined organic layers were dried over anhydrous  $Na_2SO_4$ , filtered and

concentrated under reduced pressure. The residue was purified by column chromatography on silica gel with petroleum ether/ethyl acetate (10:1) as the eluent to give **4** (42.9 mg, 83%).

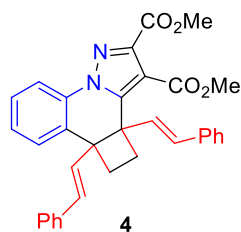

**Dimethyl 3b,5a-di((E)-styryl)-3b,4,5,5a-tetrahydrocyclobuta[c]pyrazolo[1,5-a]quinoline-2,3-dicarboxylate (4)**

Eluent: petroleum ether/ethyl acetate (10:1). Yellow solid (42.9 mg, 83%), mp 61.1-62.5 °C.  $^1\text{H}$  NMR ( $\text{CDCl}_3$ , 600 MHz):  $\delta$  8.26 (dd,  $J_1 = 8.4$  Hz,  $J_2 = 1.2$  Hz, 1H), 7.39-7.37 (m, 3H), 7.31 (t,  $J = 7.8$  Hz, 2H), 7.28-7.23 (m, 6H), 7.22-7.18 (m, 2H), 6.67 (d,  $J = 16.2$  Hz, 1H), 6.34 (d,  $J = 16.2$  Hz, 1H), 6.30-6.27 (m, 2H), 3.99 (s, 3H), 3.60 (s, 3H), 2.89-2.84 (m, 1H), 2.71-2.67 (m, 2H), 2.36-2.31 (m, 1H).  $^{13}\text{C}\{^1\text{H}\}$  NMR ( $\text{CDCl}_3$ , 150 MHz):  $\delta$  163.1, 162.7, 144.1, 144.0, 136.6, 136.5, 133.4, 131.6, 131.2, 130.8, 130.7, 129.4, 128.8, 128.61, 128.58, 128.3, 127.9, 127.8, 127.4, 126.54, 126.48, 117.2, 114.4, 52.7, 52.0, 50.2, 48.4, 32.8, 30.8. HRMS (ESI)  $m/z$ :  $[\text{M}+\text{Na}]^+$  Calcd for  $\text{C}_{33}\text{H}_{28}\text{N}_2\text{NaO}_4$  539.1941; Found 539.1932.

## 2.2 Synthesis of **5**<sup>[5]</sup>

To a reaction tube equipped with a stir bar were charged with **3a** (41.8 mg, 0.1 mmol), THF (1 mL), aryne precursor (35.8 mg, 0.12 mmol) and TBAF (0.16 mL, 1 mol/L in THF). The tube was then sealed, and the resulting mixture was stirred at room temperature under argon for 12 h. Upon completion, the reaction mixture was poured into saturated aqueous  $\text{NaHCO}_3$  and extracted with EtOAc for three times. The combined organic layers were dried over anhydrous  $\text{Na}_2\text{SO}_4$ , filtered and concentrated under reduced pressure. The residue was purified by column chromatography on silica gel with petroleum ether/ethyl acetate (30:1) as the eluent to give **5** (29.1 mg, 64%).



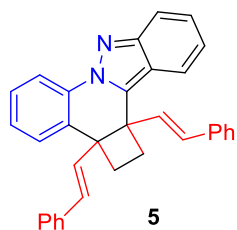

### 2a,12c-Di(*E*)-styryl)-1,2,2a,12c-tetrahydrocyclobuta[*c*]indazolo[2,3-*a*]quinoline (**5**)

Eluent: petroleum ether/ethyl acetate (30:1). White solid (29.1 mg, 64%), mp 211.7-212.1 °C. <sup>1</sup>H NMR (CDCl<sub>3</sub>, 600 MHz): δ 8.46 (d, *J* = 7.8 Hz, 1H), 7.76 (d, *J* = 9.0 Hz, 1H), 7.50 (d, *J* = 8.4 Hz, 1H), 7.44-7.41 (m, 1H), 7.38 (d, *J* = 7.2 Hz, 2H), 7.34-7.20 (m, 11H), 6.93 (t, *J* = 7.8 Hz, 1H), 6.63 (d, *J* = 15.6 Hz, 1H), 6.57-6.50 (m, 2H), 6.41 (d, *J* = 16.8 Hz, 1H), 2.90-2.86 (m, 1H), 2.80-2.76 (m, 1H), 2.62-2.57 (m, 1H), 2.42-2.38 (m, 1H). <sup>13</sup>C{<sup>1</sup>H} NMR (CDCl<sub>3</sub>, 150 MHz): δ 149.5, 136.8, 136.7, 135.0, 133.3, 132.0, 131.5, 131.4, 131.3, 130.1, 129.0, 128.8, 128.7, 128.3, 127.80, 127.78, 127.22, 127.19, 126.6, 126.5, 121.7, 121.0, 120.5, 118.0, 117.8, 50.6, 48.6, 31.6, 31.4. HRMS (ESI) *m/z*: [M+H]<sup>+</sup> Calcd for C<sub>33</sub>H<sub>27</sub>N<sub>2</sub> 451.2169; Found 451.2172.

### 2.3 Synthesis of **6**<sup>[5]</sup>

To a reaction tube equipped with a stir bar were charged with **3a** (41.8 mg, 0.1 mmol), toluene (1 mL) and *N*-methylmaleimide (22.2 mg, 0.2 mmol). The tube was then sealed, and the resulting mixture was stirred at 115 °C for 12 h. Upon completion, it was quenched with saturated brine and extracted with ethyl acetate for three times. The combined organic layers were dried over anhydrous Na<sub>2</sub>SO<sub>4</sub>, filtered and concentrated under reduced pressure. The residue was purified by column chromatography on silica gel with petroleum ether/ethyl acetate (20:1) as the eluent to give **6** (30.4 mg, 51%).

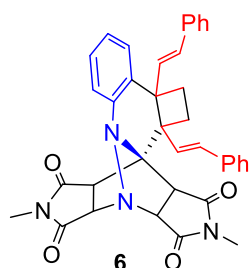

**10,14-Dimethyl-2a,11c-di(*E*-styryl)-1,2,2a,8a,11a,11c-hexahydro-9*H*-8,11b-[3,4]epipyrrolocyclobuta[*c*]pyrrolo[3',4':3,4]pyrazolo[1,5-*a*]quinoline-9,11,13,15(10*H*)-tetraone (6)**

Eluent: petroleum ether/ethyl acetate (20:1). Yellow solid (30.4 mg, 51%), mp 197.6-198.1 °C. <sup>1</sup>H NMR (CDCl<sub>3</sub>, 600 MHz): δ 7.52-7.50 (m, 4H), 7.47 (dd, *J*<sub>1</sub> = 8.4 Hz, *J*<sub>2</sub> = 1.2 Hz, 1H), 7.35 (t, *J* = 7.8 Hz, 2H), 7.29-7.23 (m, 3H), 7.22-7.16 (m, 3H), 7.11-7.09 (m, 1H), 6.97 (dd, *J*<sub>1</sub> = 7.8 Hz, *J*<sub>2</sub> = 1.2 Hz, 1H), 6.81-6.78 (m, 1H), 6.51-6.45 (m, 2H), 4.10 (d, *J* = 7.2 Hz, 1H), 4.07 (d, *J* = 6.0 Hz, 1H), 3.15 (d, *J* = 6.6 Hz, 1H), 2.99-2.97 (m, 4H), 2.81-2.75 (m, 1H), 2.54-2.50 (m, 1H), 2.30 (s, 3H), 2.07-2.02 (m, 1H), 1.61-1.58 (m, 1H). <sup>13</sup>C{<sup>1</sup>H} NMR (CDCl<sub>3</sub>, 150 MHz): δ 173.63, 173.56, 172.5, 172.1, 138.7, 137.8, 137.5, 134.4, 132.7, 132.0, 130.1, 129.1, 128.68, 128.67, 128.3, 127.6, 127.5, 127.3, 126.7, 126.5, 123.4, 117.9, 82.2, 71.1, 69.7, 54.1, 51.7, 51.5, 50.1, 30.3, 26.1, 25.3, 24.4. HRMS (ESI) *m/z*: [M+Na]<sup>+</sup> Calcd for C<sub>37</sub>H<sub>32</sub>N<sub>4</sub>NaO<sub>4</sub> 619.2316; Found 619.2320.

**2.4 Synthesis of 7<sup>[6]</sup>**

To a reaction tube equipped with a stir bar were charged with **3a** (41.8 mg, 0.1 mmol), ethyl acetate (2 mL) and Pd/C (42.6 mg, 0.04mmol). The tube was then sealed, and the resulting mixture was stirred at rt under H<sub>2</sub> (balloon) for 24 h. Upon completion, the mixture was filtered over celite. The filtrate was concentrated under reduced pressure, and the residue was purified by silica gel column chromatography with petroleum ether/ethyl acetate (10:1) as eluent to afford **7** (32.1 mg, 76%).

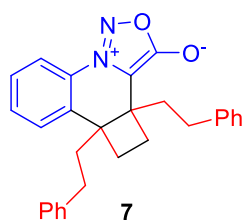

**3b,5a-Diphenethyl-3b,4,5,5a-tetrahydrocyclobuta[*c*][1,2,3]oxadiazolo[3,4-*a*]quinolin-10-ium-3-olate (7)**

Eluent: petroleum ether/ethyl acetate (10:1). White solid (32.1 mg, 76%), mp 147.6-148.3 °C. <sup>1</sup>H NMR (CDCl<sub>3</sub>, 600 MHz): δ 8.14 (dd, *J*<sub>1</sub> = 7.8 Hz, *J*<sub>2</sub> = 1.2 Hz, 1H), 7.65-7.62 (m, 1H), 7.55-7.54 (m, 1H), 7.50-7.47 (m, 1H), 7.29-7.27 (m, 4H), 7.25-7.22 (m, 2H), 7.20-7.15 (m, 2H), 7.03 (d, *J* = 7.2 Hz, 2H), 2.87-2.77 (m, 2H),

2.69-2.63 (m, 1H), 2.56-2.50 (m, 1H), 2.46-2.35 (m, 3H), 2.27-2.14 (m, 4H), 2.11-2.07 (m, 1H).  $^{13}\text{C}\{^1\text{H}\}$  NMR ( $\text{CDCl}_3$ , 150 MHz):  $\delta$  166.5, 141.9, 141.0, 136.6, 132.3, 130.6, 128.6, 128.5, 128.3, 128.1, 127.9, 126.3, 126.1, 117.1, 105.7, 47.1, 41.8, 38.7, 35.6, 35.0, 32.2, 32.0, 31.4. HRMS (ESI)  $m/z$ :  $[\text{M}+\text{Na}]^+$  Calcd for  $\text{C}_{28}\text{H}_{26}\text{N}_2\text{NaO}_2$  445.1886; Found 445.1882.

### 3. Gram-scale synthesis of **3a**

To a reaction tube equipped with a stir bar were charged with 3-phenyl-1,2,3-oxadiazol-3-ium-5-olate (**1a**, 648.6 mg, 4 mmol), DCE (40 mL),  $[\text{Cp}^*\text{RhCl}_2]_2$  (61.8 mg, 0.1 mmol), AgOAc (133.5 mg, 0.8 mmol), TEMPO (625 mg, 4 mmol) and 1-phenylbuta-2,3-dien-1-yl acetate (**2a**, 1882.3 mg, 10 mmol). The tube was then sealed, and the resulting mixture was stirred at 50 °C under argon for 24 h. Upon completion, it was cooled to room temperature, quenched with water and extracted with dichloromethane for three times. The combined organic phases were dried over anhydrous  $\text{Na}_2\text{SO}_4$ , filtered and concentrated under reduced pressure. The residue was purified by silica gel column chromatography with petroleum ether/ethyl acetate (5:1) as eluent to afford **3a** (1039.4 mg, 62%).

### III. Mechanistic studies

#### 1. H/D exchange experiment (I)

To a reaction tube equipped with a stir bar were charged with **1a** (32.4 mg, 0.2 mmol), DCE (2 mL), D<sub>2</sub>O (36  $\mu$ L, 2 mmol), [Cp\**Rh*Cl<sub>2</sub>]<sub>2</sub> (3.1 mg, 0.005 mmol), AgOAc (6.7 mg, 0.02 mmol) and TEMPO (31.3 mg, 0.2 mmol). The resulting mixture was stirred at 50 °C under argon for 5 h. Afterwards, it was cooled to room temperature, quenched with water and extracted with dichloromethane for three times. The combined organic phases were dried over anhydrous Na<sub>2</sub>SO<sub>4</sub>, filtered and concentrated under reduced pressure. The residue was purified by silica gel column chromatography using petroleum ether/ethyl acetate (3:1) as eluent to give a mixture of **1a** and **1a-d<sub>n</sub>**. Upon analyzing the <sup>1</sup>H NMR spectrum of the mixture, the deuteration ratio at the 4-position of the sydnone moiety of **1a** was determined to be about 60%. Meanwhile, H/D exchange at the *ortho*-positions of the phenyl ring of **1a** was not observed.

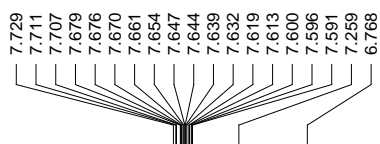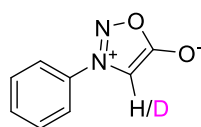

**1a/1a-d<sub>n</sub>**  
(400 MHz, CDCl<sub>3</sub>)

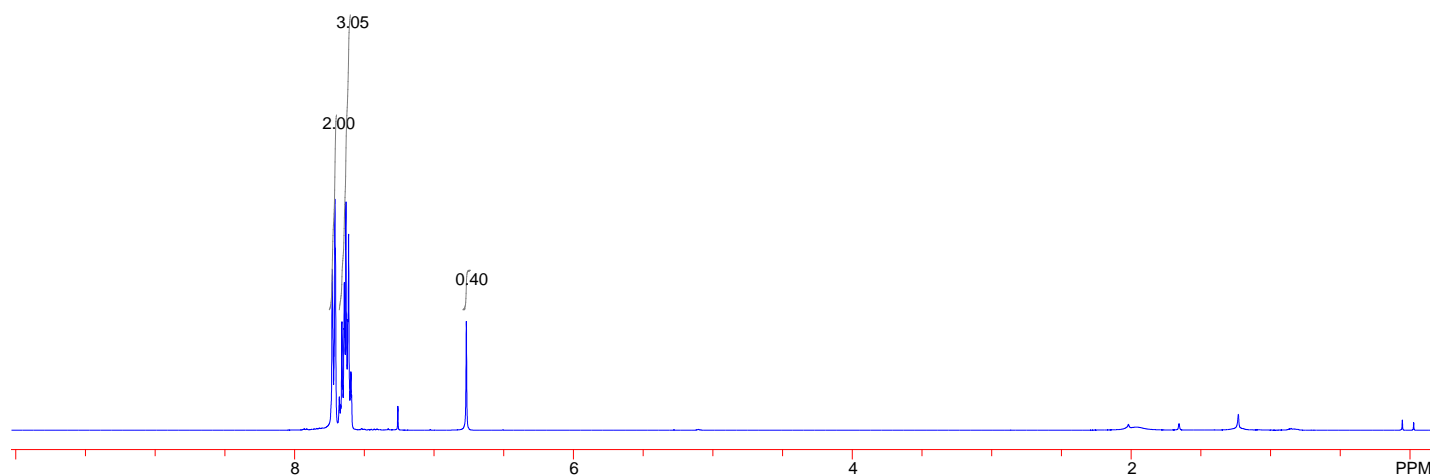

#### 2. H/D exchange experiment (II)

To a reaction tube equipped with a stir bar were charged with **1a** (32.4 mg, 0.2 mmol), **2a** (94.1 mg, 0.5 mmol), DCE (2 mL), D<sub>2</sub>O (36 μL, 2 mmol), [Cp\*RhCl<sub>2</sub>]<sub>2</sub> (3.1 mg, 0.005 mmol), AgOAc (6.7 mg, 0.02 mmol), and TEMPO (31.3 mg, 0.2 mmol). The resulting mixture was stirred at 50 °C under argon for 5 h. Afterwards, it was cooled to room temperature, quenched with water and extracted with dichloromethane for three times. The combined organic phases were dried over anhydrous Na<sub>2</sub>SO<sub>4</sub>, filtered and concentrated under reduced pressure. The residue was purified by silica gel column chromatography using petroleum ether/ethyl acetate (3:1) as eluent to give **3a** and a mixture of **1a** with **1a-d<sub>n</sub>**. Upon analyzing the <sup>1</sup>H NMR spectrum of the mixture of **1a** and **1a-d<sub>n</sub>**, the deuteration ratio at the 4-position of the sydnone moiety of **1a** was determined to be about 50%. Meanwhile, H/D exchange at the unreacted phenyl *ortho*-position of product **3a** was not observed.

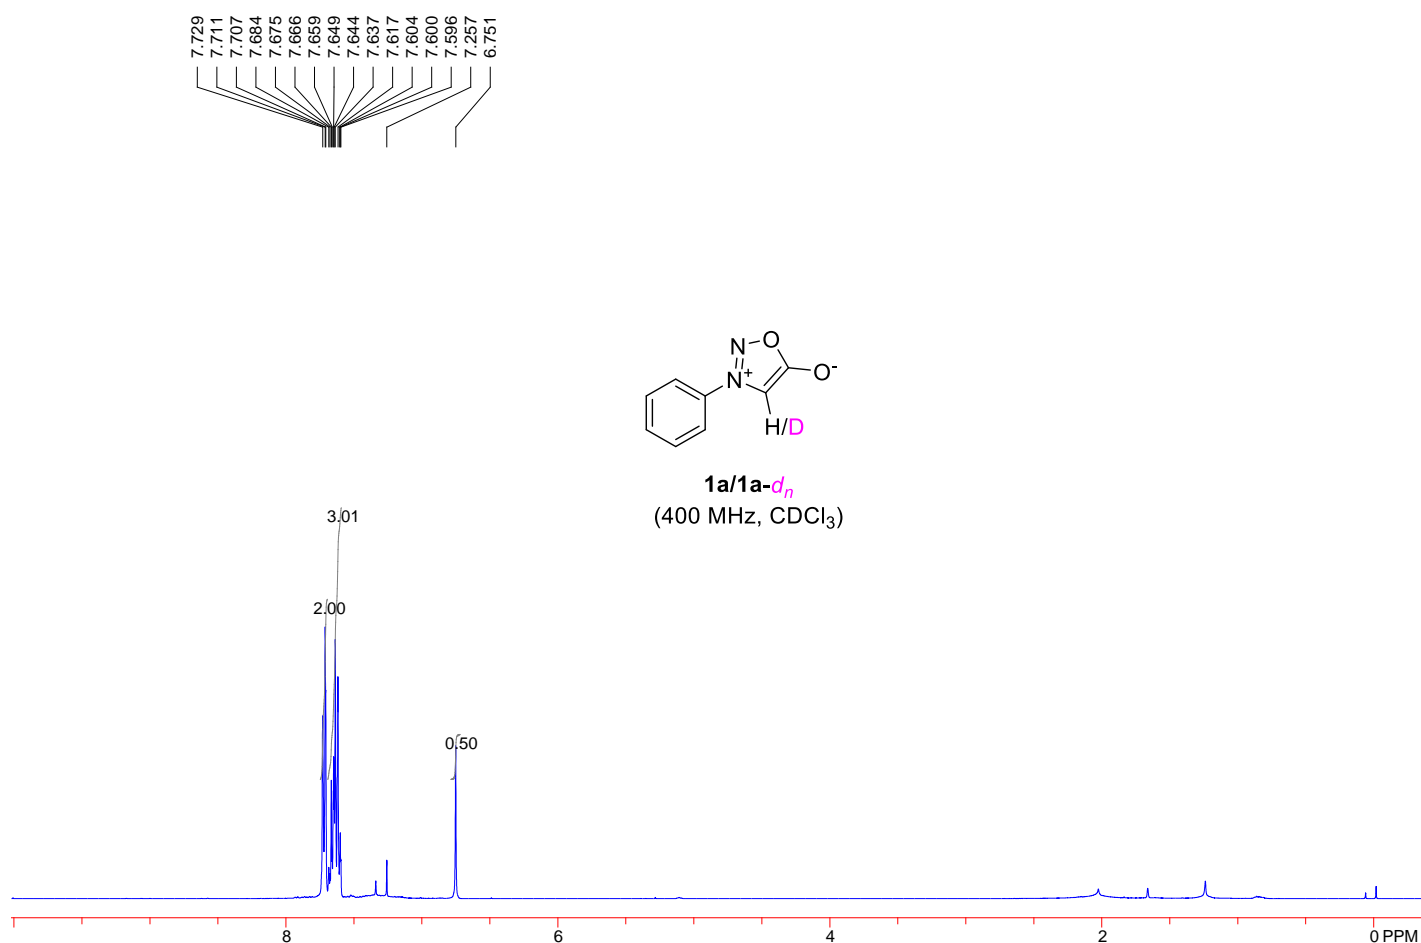

### 3. Kinetic isotope effect study

To a reaction tube equipped with a stir bar were charged with **1a** (32.4 mg, 0.2 mmol), **1a-d<sub>5</sub>** (33.4 mg, 0.2 mmol), **2a** (75.3 mg, 0.4 mmol), DCE (2 mL), [Cp\**RhCl*<sub>2</sub>]<sub>2</sub> (3.1 mg, 0.005 mmol), AgOAc (6.7 mg, 0.04 mmol) and TEMPO (31.3 mg, 0.2 mmol). The resulting mixture was stirred at 50 °C under argon for 30 min. Afterwards, it was cooled to room temperature, quenched with water and extracted with dichloromethane (10 mL × 3). The combined organic phases were dried over anhydrous Na<sub>2</sub>SO<sub>4</sub>, filtered and concentrated under reduced pressure. The residue was purified by silica gel column chromatography using petroleum ether/ethyl acetate (5:1) as eluent to give a mixture of **3a** and **3a-d<sub>4</sub>**. Upon analyzing the <sup>1</sup>H NMR spectrum of the mixture, the ratio of **3a** to **3a-d<sub>4</sub>** was determined to be about 0.63:0.37. Accordingly, the intermolecular KIE (*k<sub>H</sub>*/*k<sub>D</sub>*) was calculated to be about 1.7.

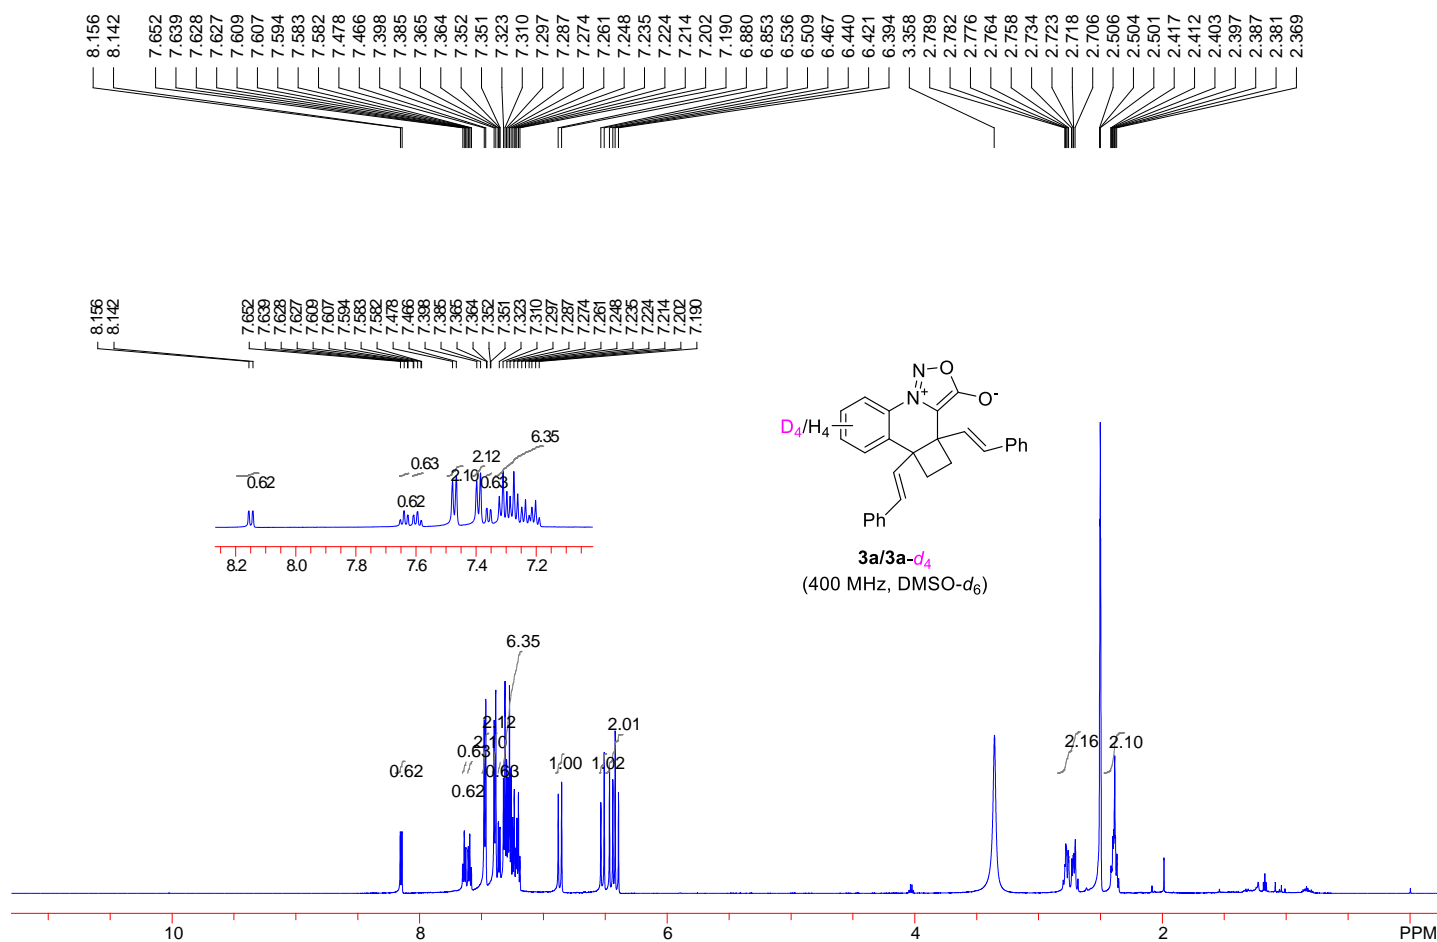

#### IV. X-ray crystal structure and data for **3a**

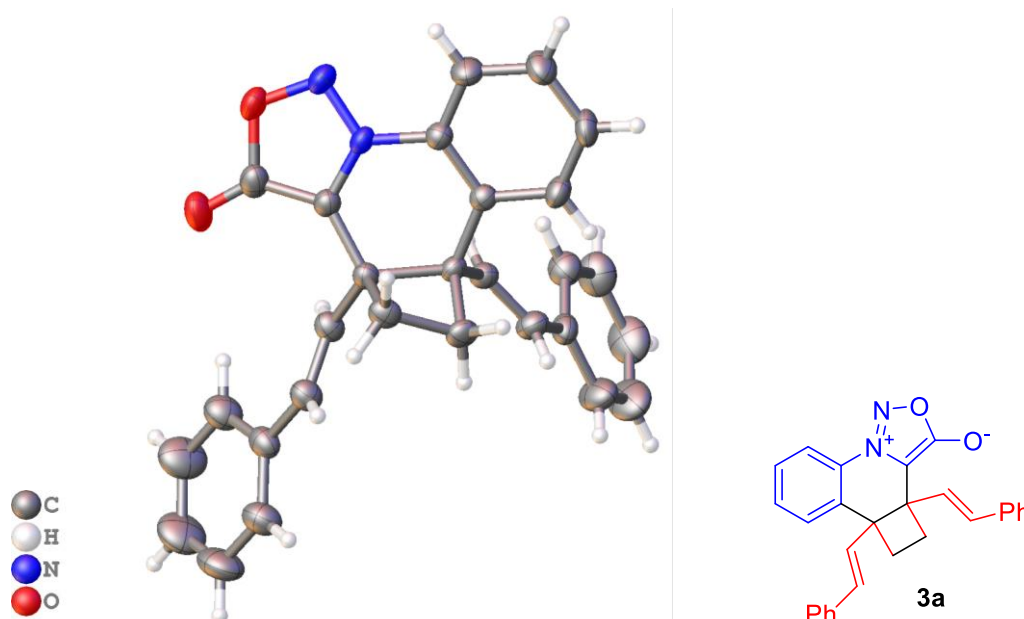

**Figure S1.** X-ray crystal structure of **3a** with 50% ellipsoid probability

**X-ray structure determination.** Single crystals suitable for X-ray diffraction were obtained by slow evaporation of the solvent from an ethyl acetate/dichloromethane (10:1) solution of **3a**. Crystal data collection and refinement parameters of **3a** are summarized in Table S1. Intensity data were collected at 293 K on a SuperNova Dual diffractometer using mirror-monochromated Cu K $\alpha$  radiation,  $\lambda = 1.54184$  Å. The data were corrected for decay, Lorentz, and polarization effects as well as absorption and beam corrections based on the multi-scan technique. Using Olex2, the structure was solved with the SHELXS structure solution program using Direct Methods and refined with the SHELXL refinement package using Least Squares minimisation. Nonhydrogen atoms were refined with anisotropic displacement parameters. The H-atoms were either located or calculated and subsequently treated with a riding model.

**Table S1.** Crystallographic data and structure refinement results of **3a**

|                   |                                                               |
|-------------------|---------------------------------------------------------------|
| Empirical formula | C <sub>28</sub> H <sub>22</sub> N <sub>2</sub> O <sub>2</sub> |
| Formula weight    | 418.47                                                        |
| Temp, K           | 293 (2)                                                       |
| Crystal system    | monoclinic                                                    |
| Space group       | P2 <sub>1</sub> /c                                            |
| <i>a</i> , Å      | 9.1597(2)                                                     |

|                                           |                |
|-------------------------------------------|----------------|
| $b$ , Å                                   | 20.6723(4)     |
| $c$ , Å                                   | 11.5149(2)     |
| $\alpha$ (°)                              | 90             |
| $\beta$ (°)                               | 100.930(2)     |
| $\gamma$ (°)                              | 90             |
| Volume, Å <sup>3</sup>                    | 2140.82(7)     |
| $Z$                                       | 4              |
| $\rho_{\text{calc}}$ , g cm <sup>-3</sup> | 1.298          |
| $\lambda$ , Å                             | 1.54184        |
| $\mu$ , mm <sup>-1</sup>                  | 0.651          |
| No. of data collected                     | 9658           |
| No. of unique data                        | 4041           |
| $R_{\text{int}}$                          | 0.0285         |
| Goodness-of-fit on $F^2$                  | 1.070          |
| $R_1$ , $wR_2$ ( $I > 2\sigma(I)$ )       | 0.0543, 0.1318 |
| $R_1$ , $wR_2$ (all data)                 | 0.0706, 0.1384 |



# V. NMR spectra of 3a-3nn

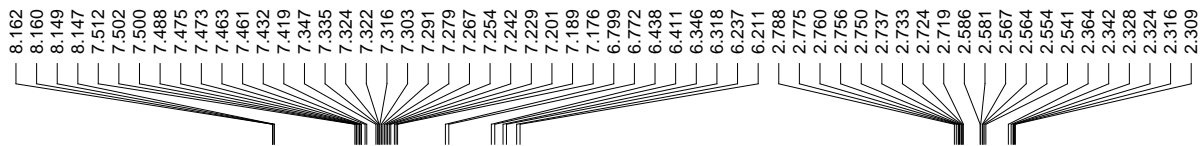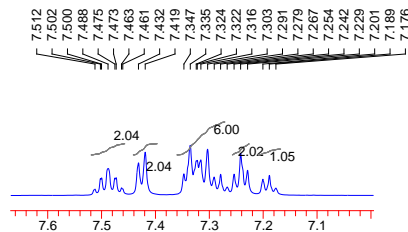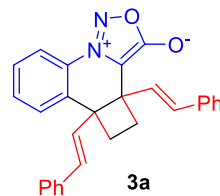

<sup>1</sup>H NMR (600 MHz, CDCl<sub>3</sub>)

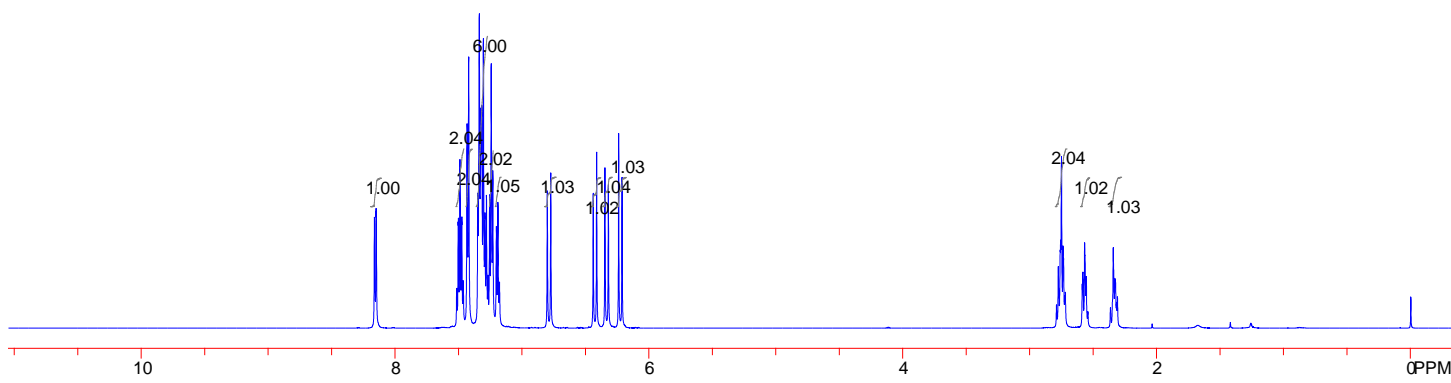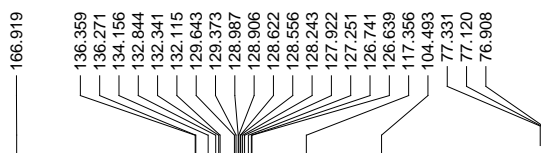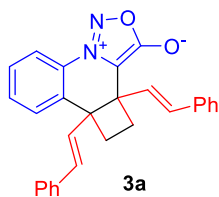

<sup>13</sup>C{<sup>1</sup>H} NMR (150 MHz, CDCl<sub>3</sub>)

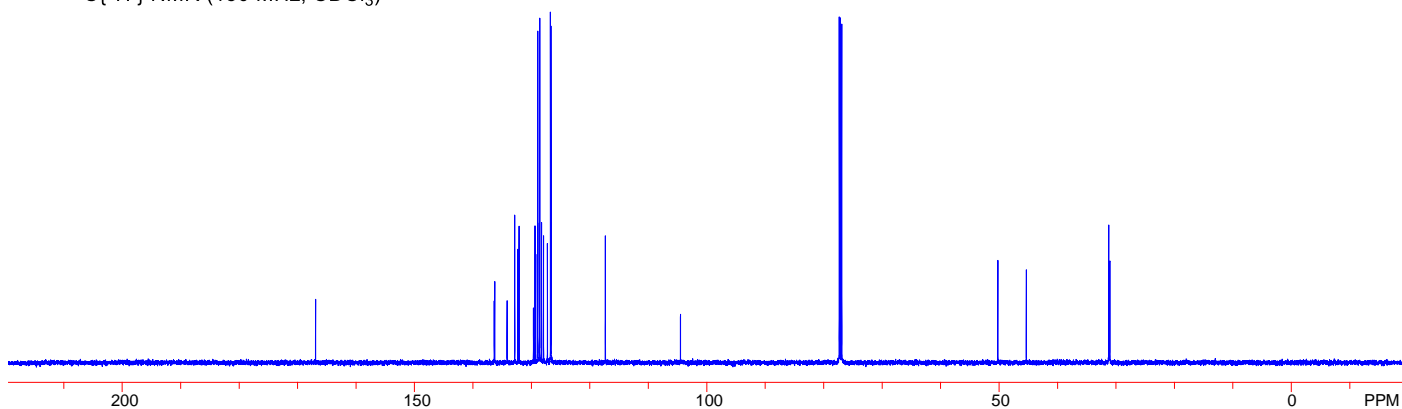

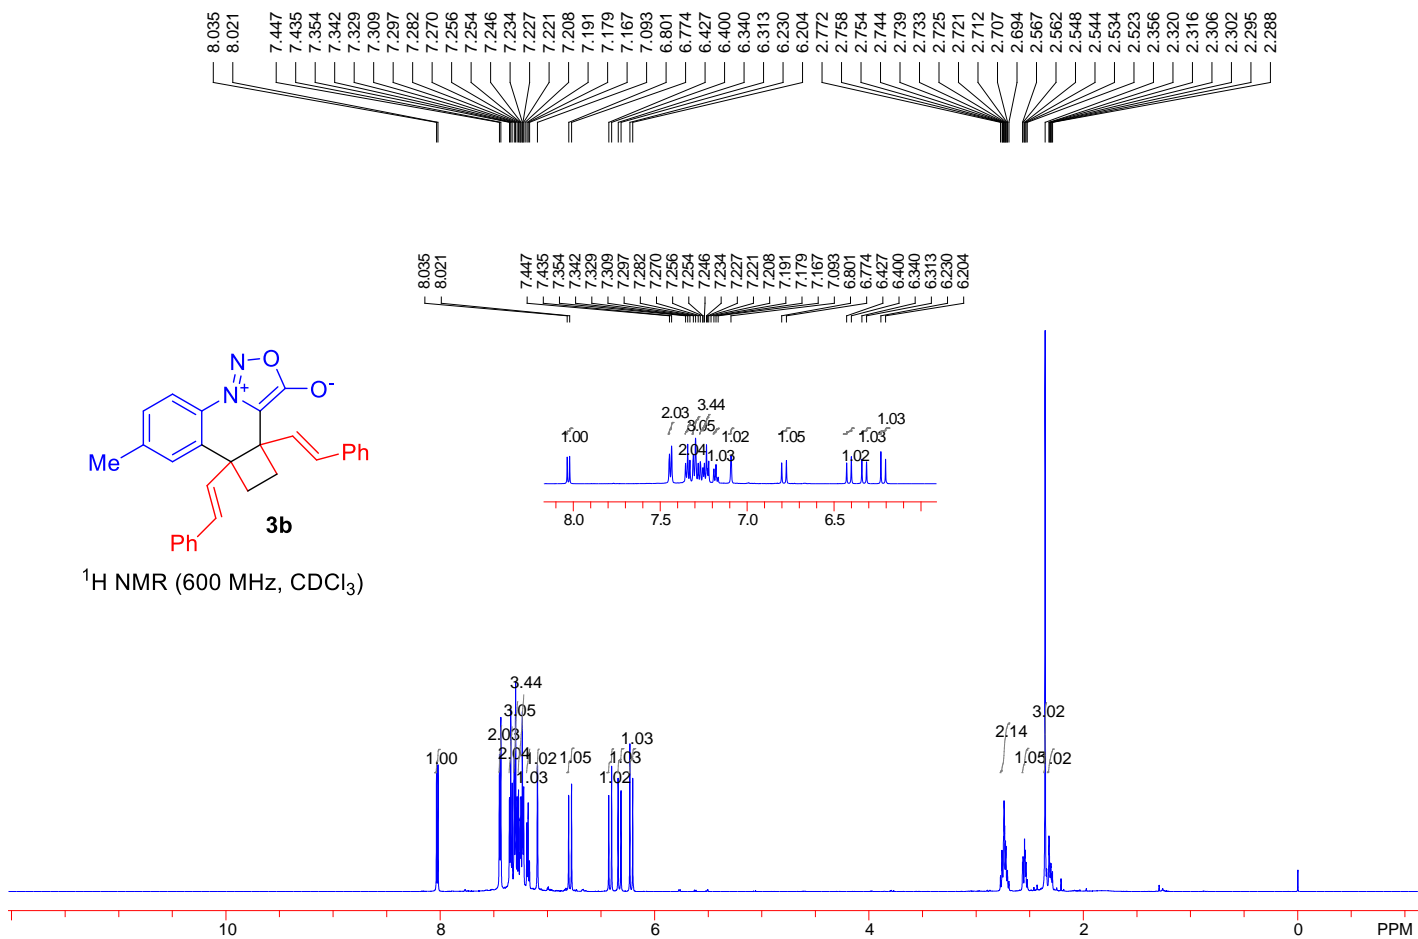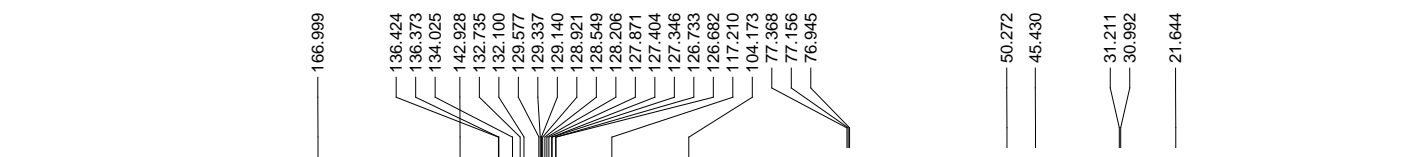

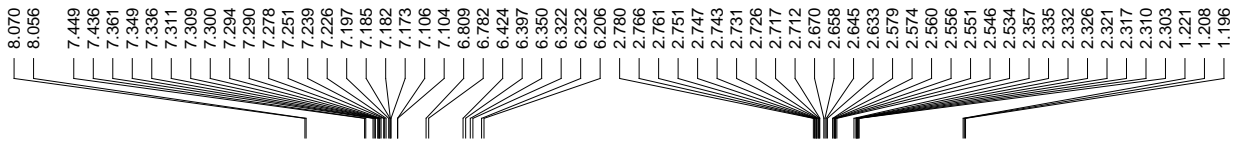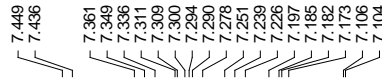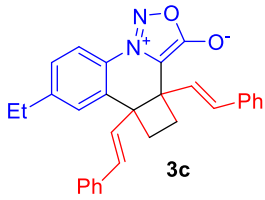

<sup>1</sup>H NMR (600 MHz, CDCl<sub>3</sub>)

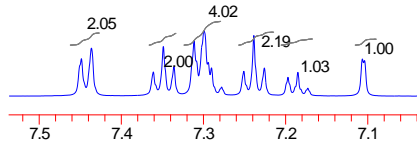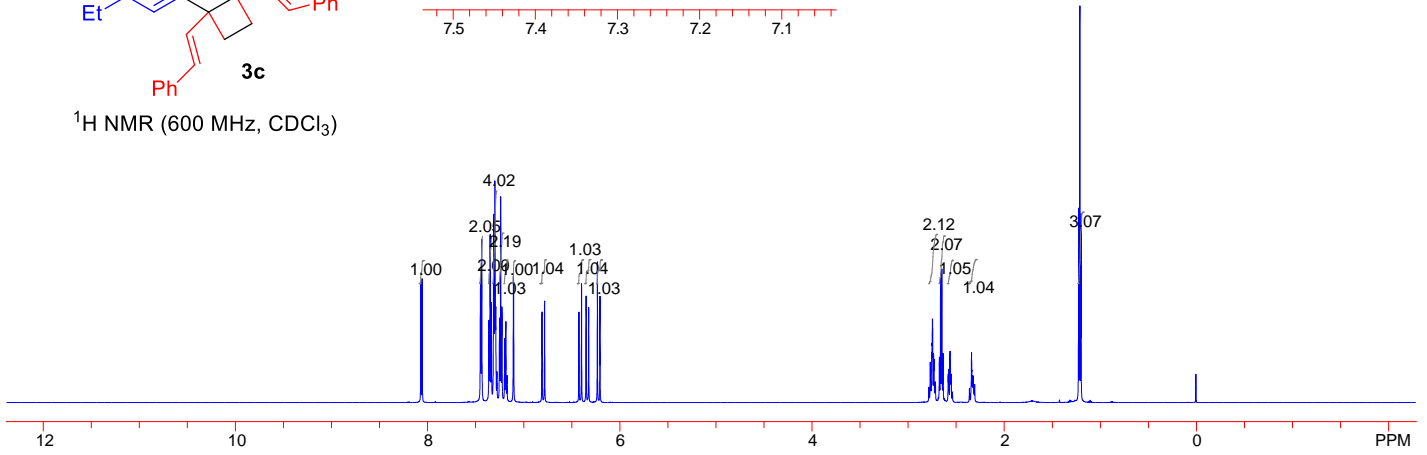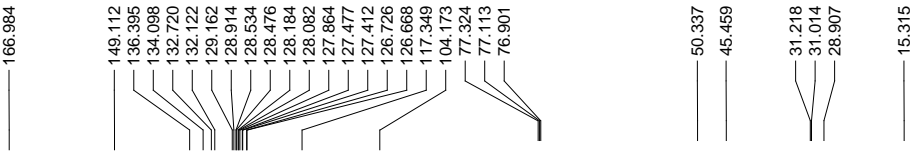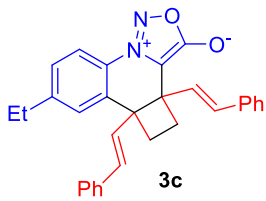

<sup>13</sup>C{<sup>1</sup>H} NMR (150 MHz, CDCl<sub>3</sub>)

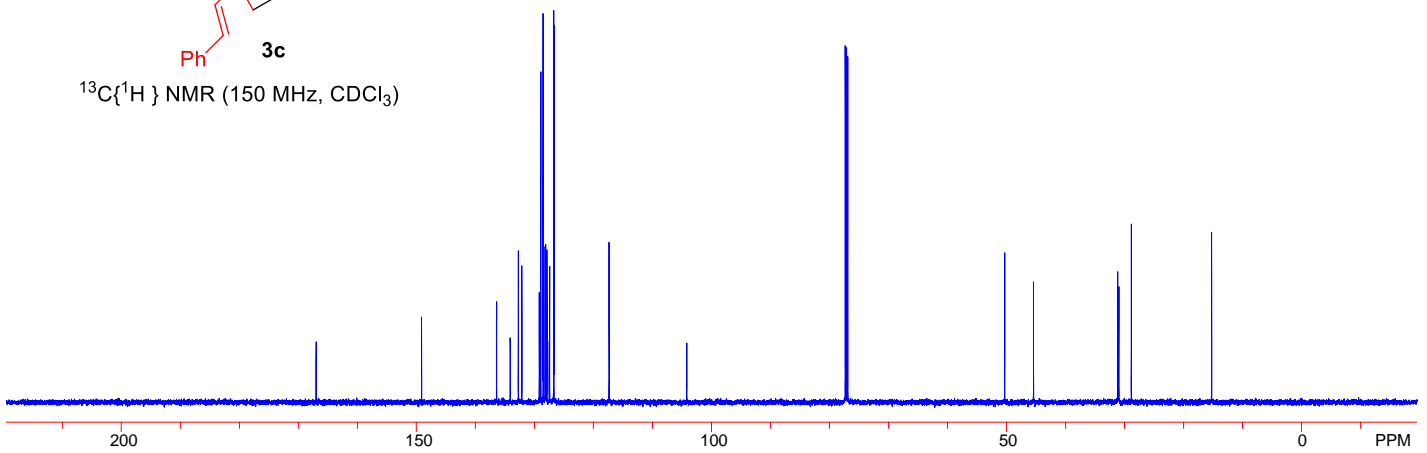

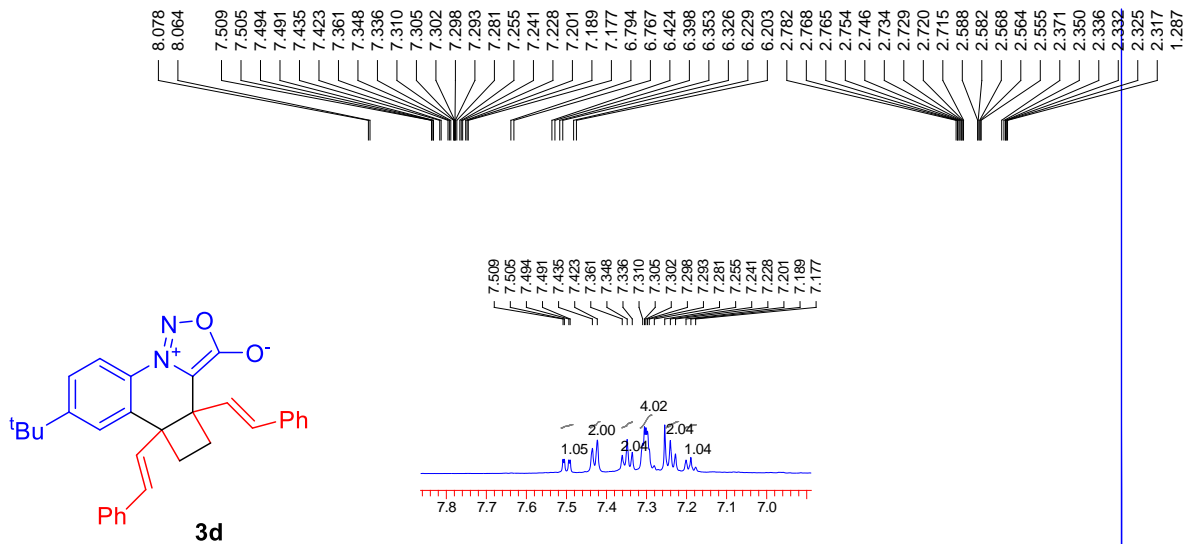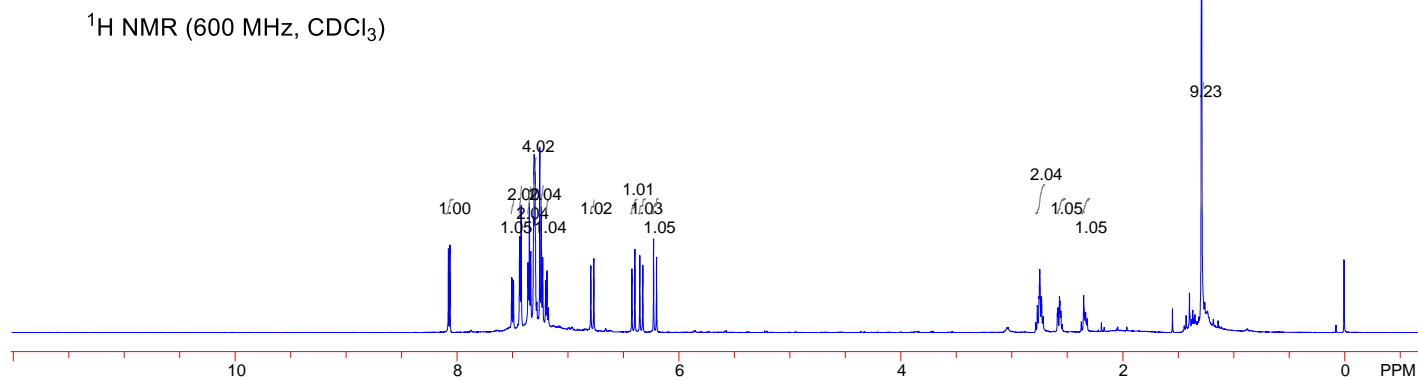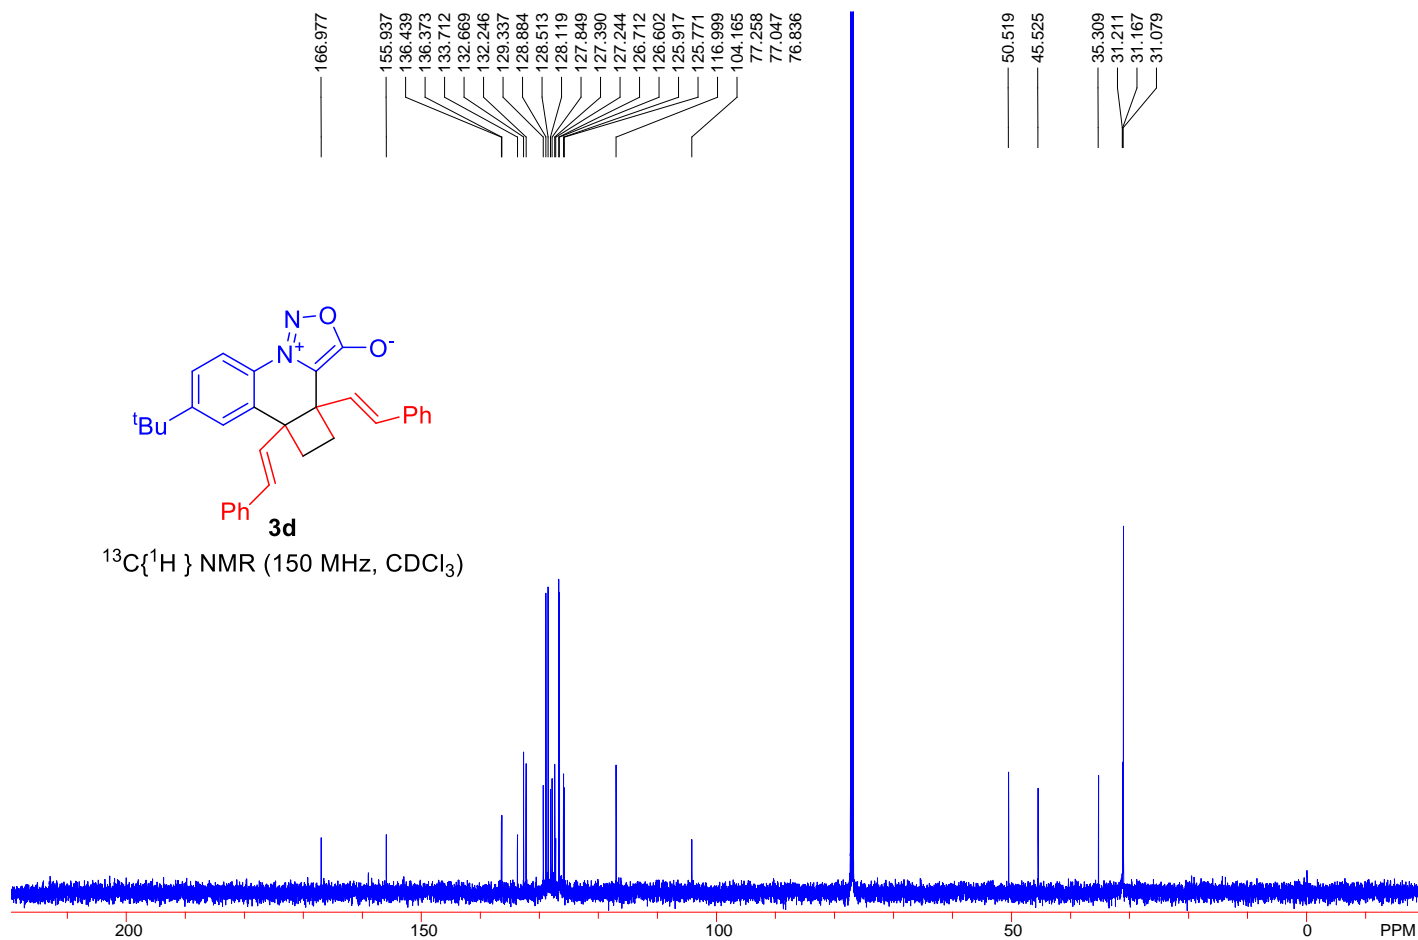

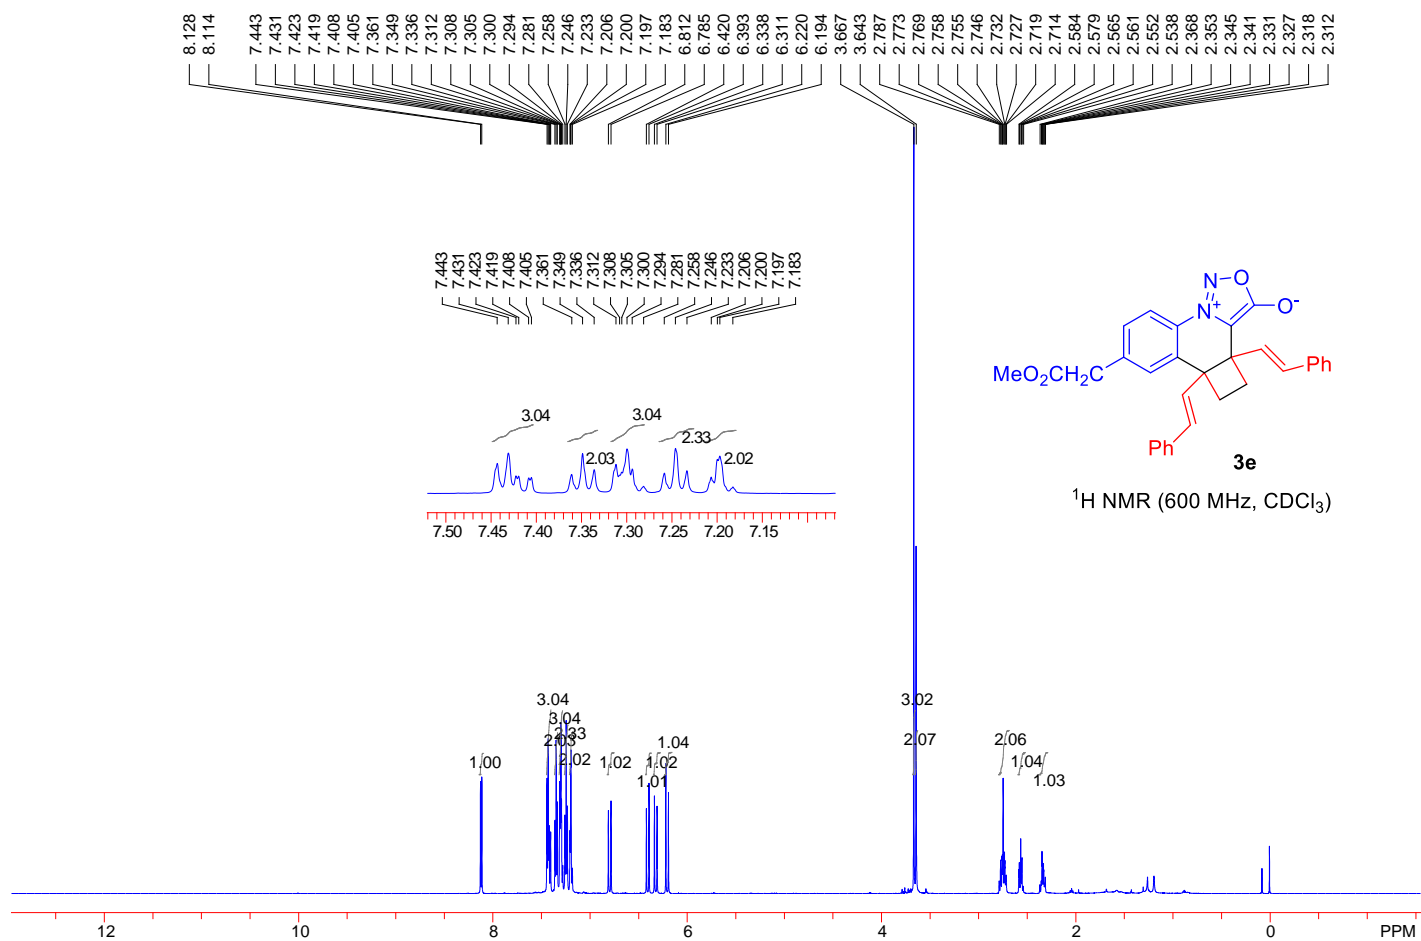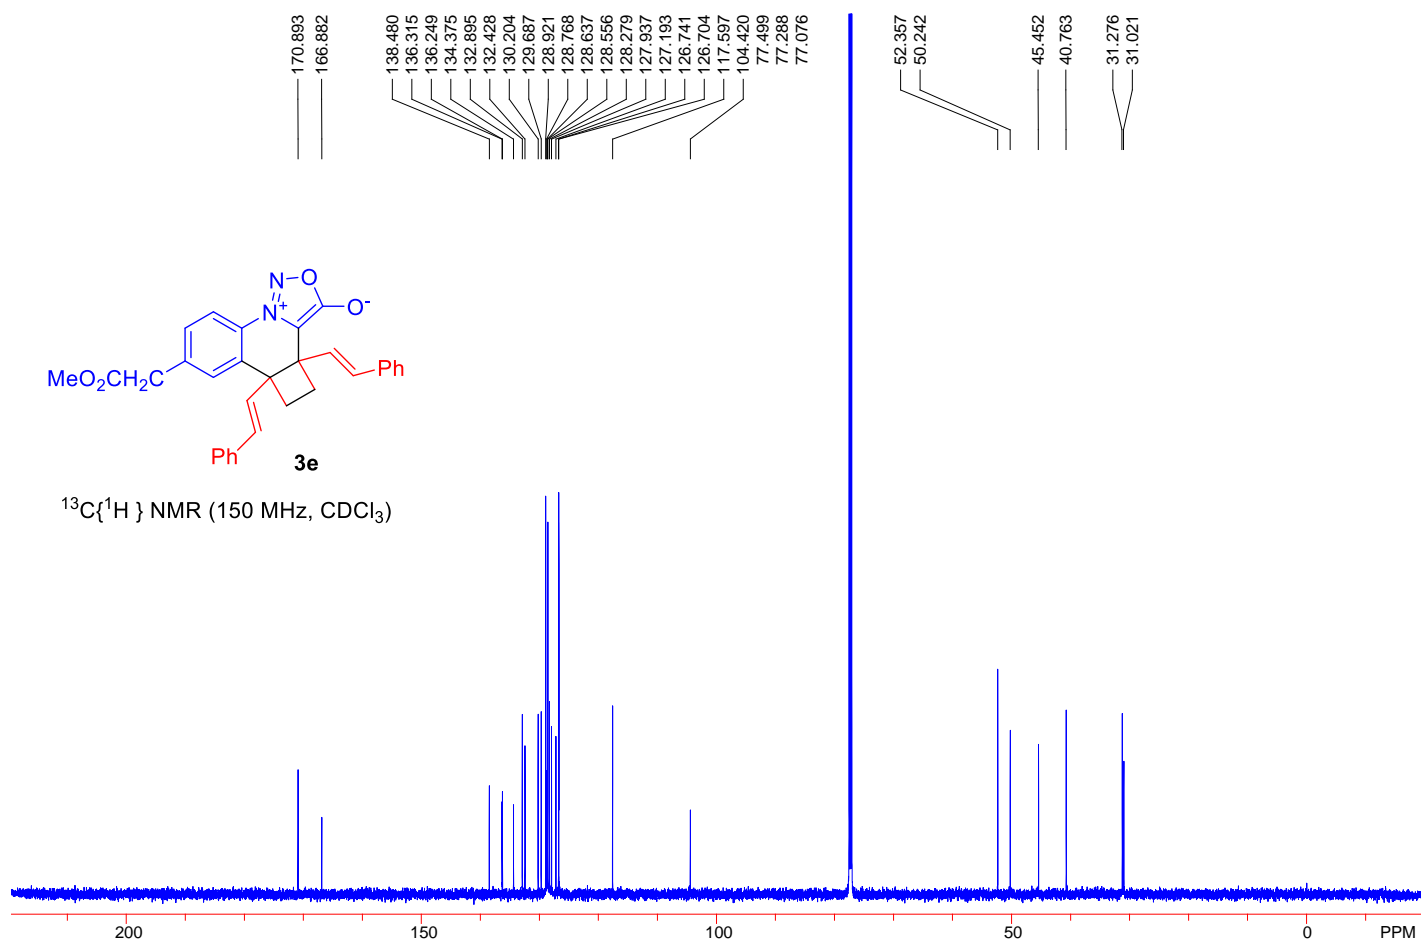

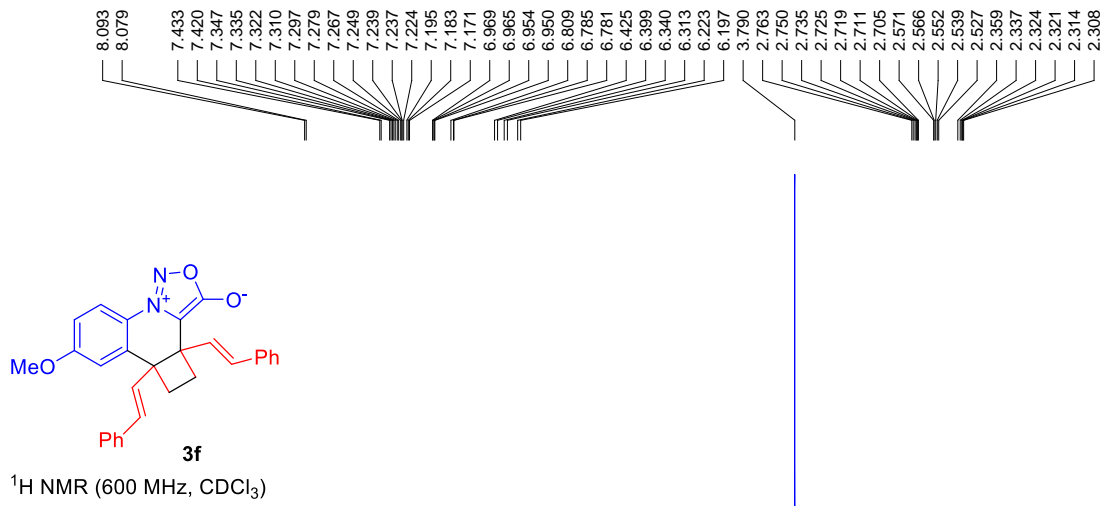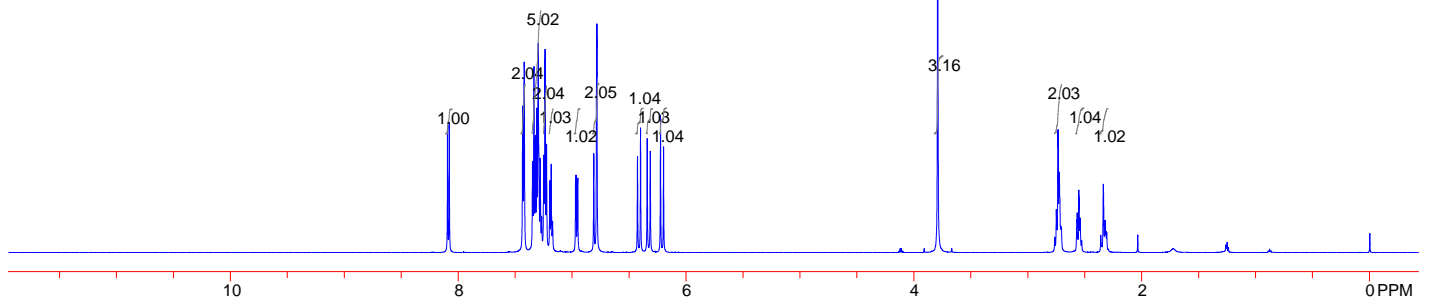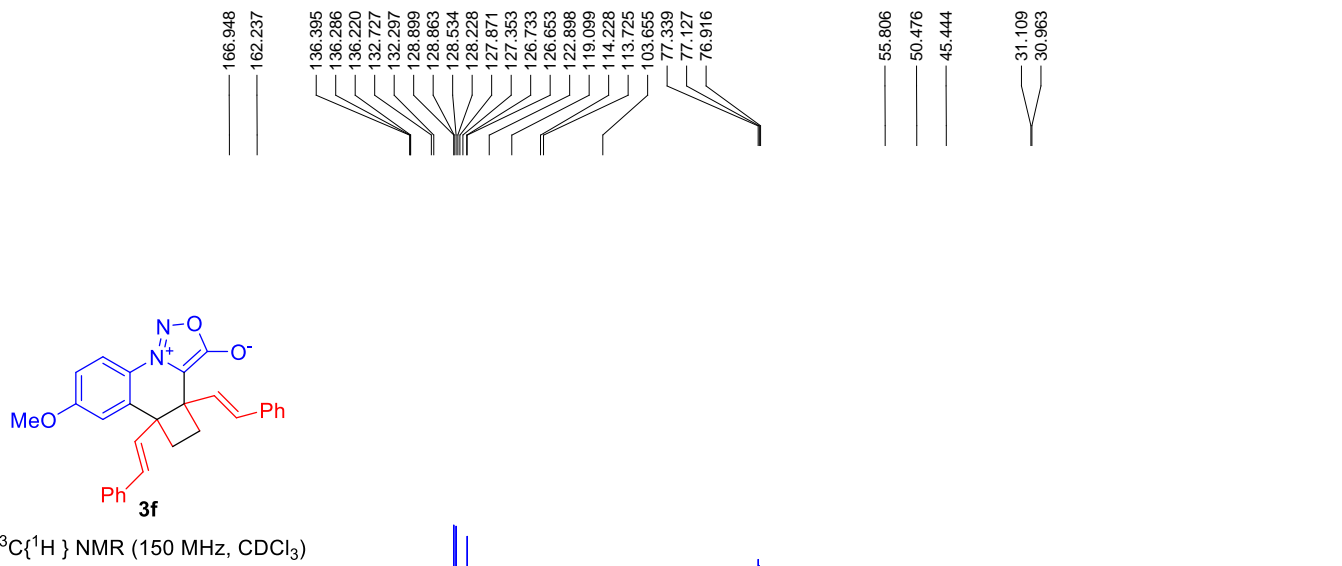

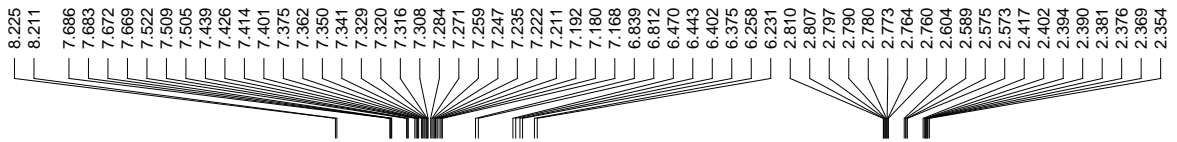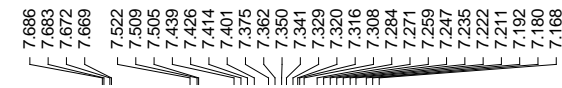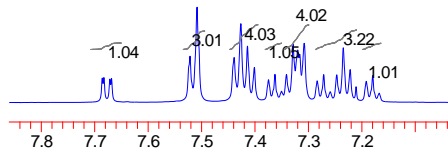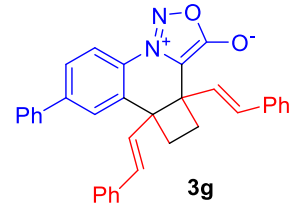

$^1\text{H NMR}$  (600 MHz,  $\text{CDCl}_3$ )

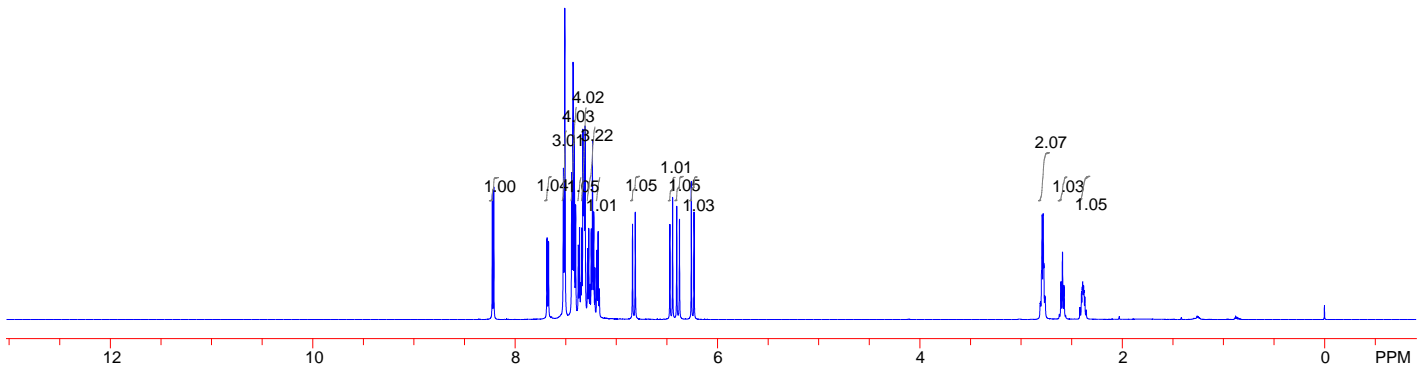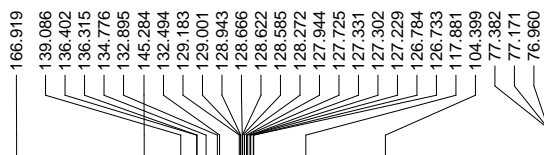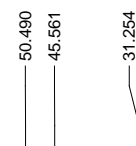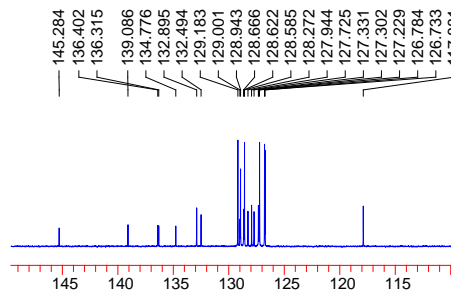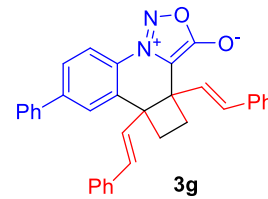

$^{13}\text{C}\{^1\text{H}\}$  NMR (150 MHz,  $\text{CDCl}_3$ )

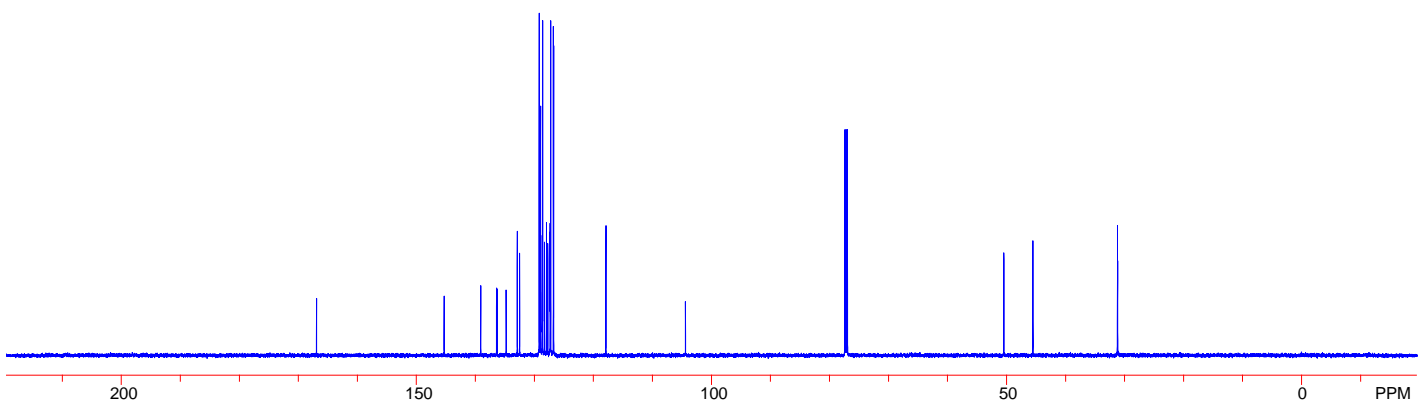

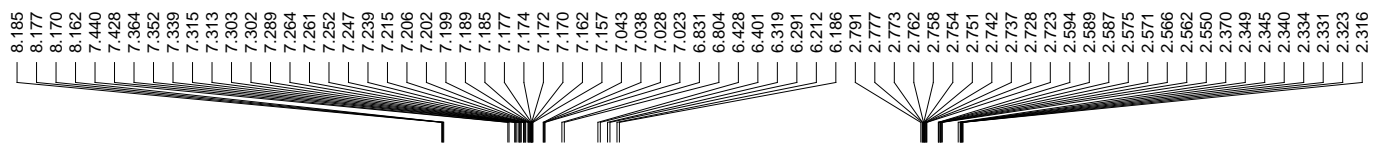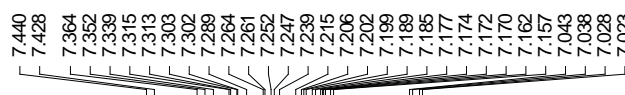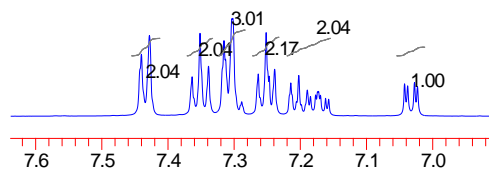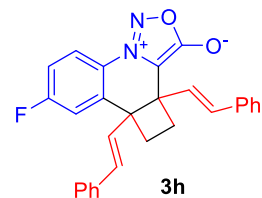

$^1\text{H}$  NMR (600 MHz,  $\text{CDCl}_3$ )

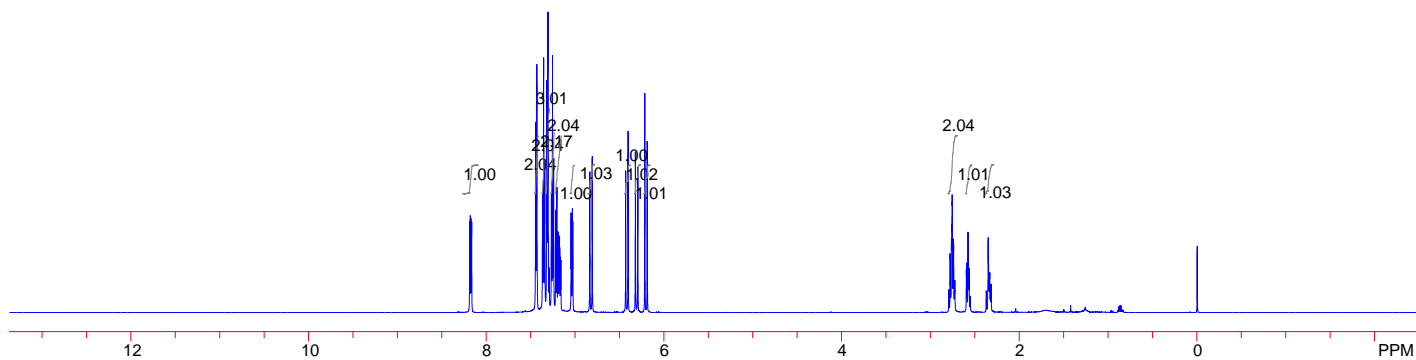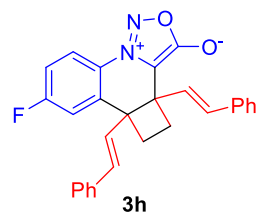

$^{13}\text{C}\{^1\text{H}\}$  NMR (150 MHz,  $\text{CDCl}_3$ )

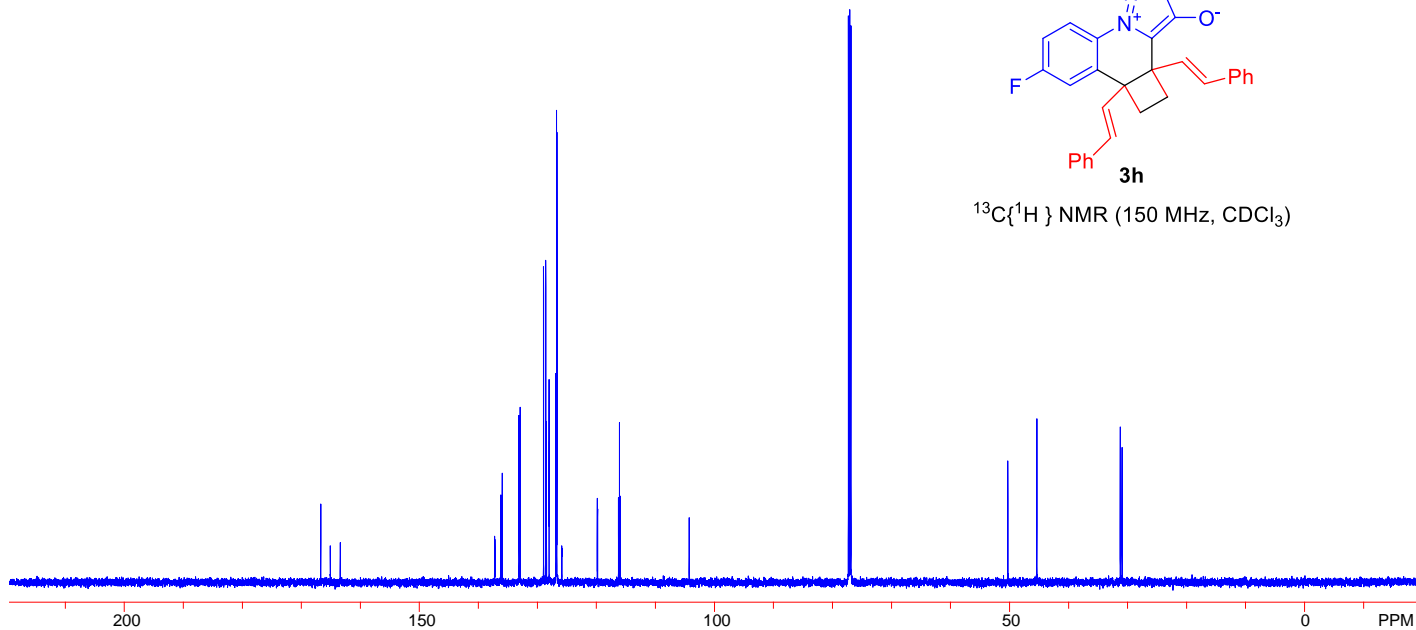



105.184  
105.198  
105.205  
105.220

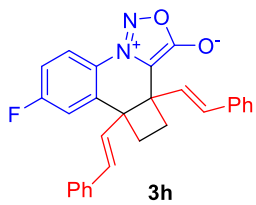

<sup>19</sup>F NMR (565 MHz, CDCl<sub>3</sub>)

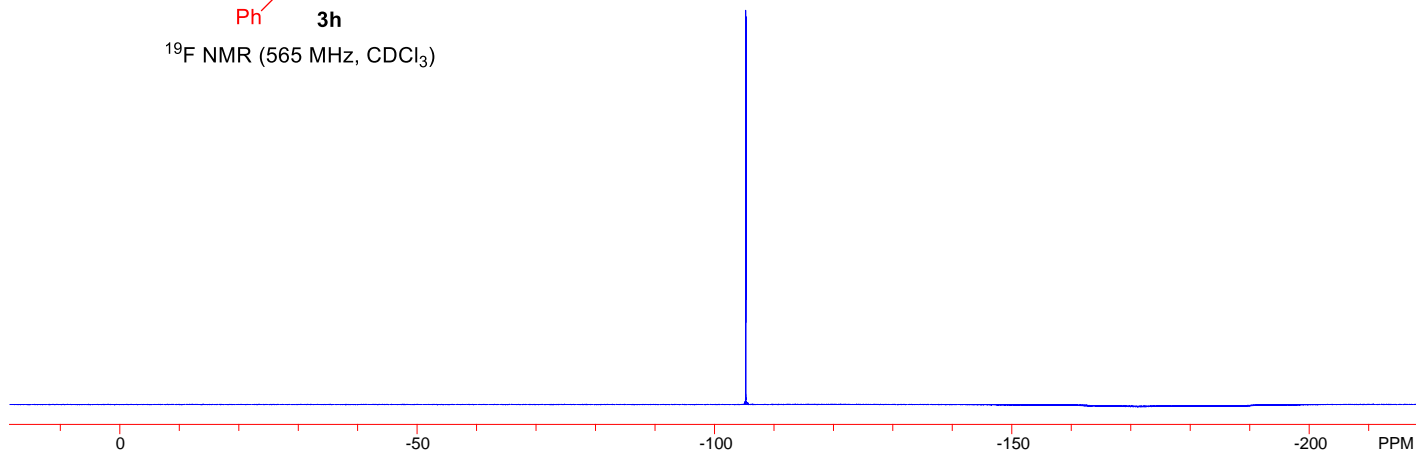

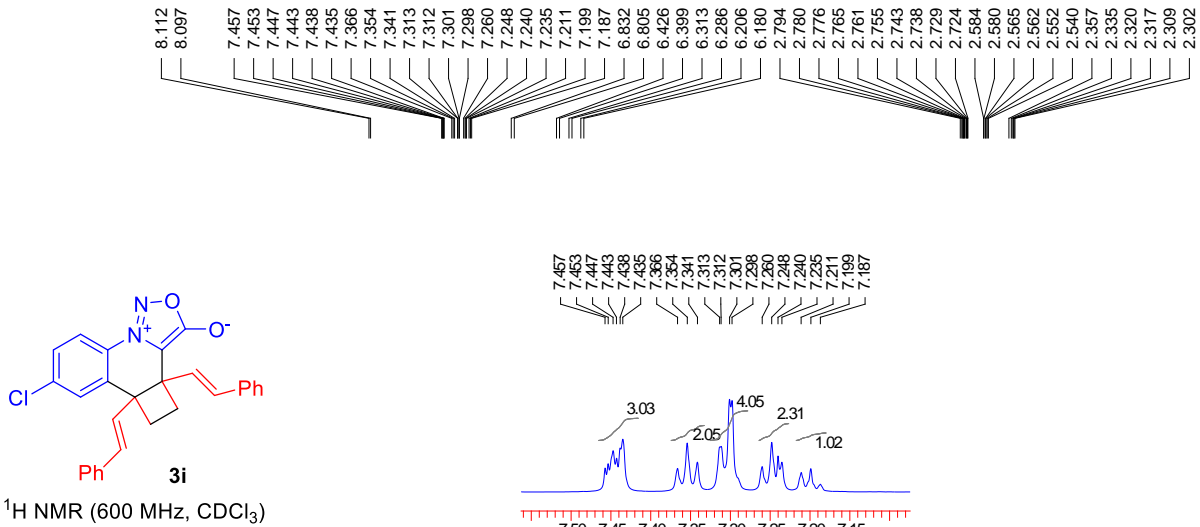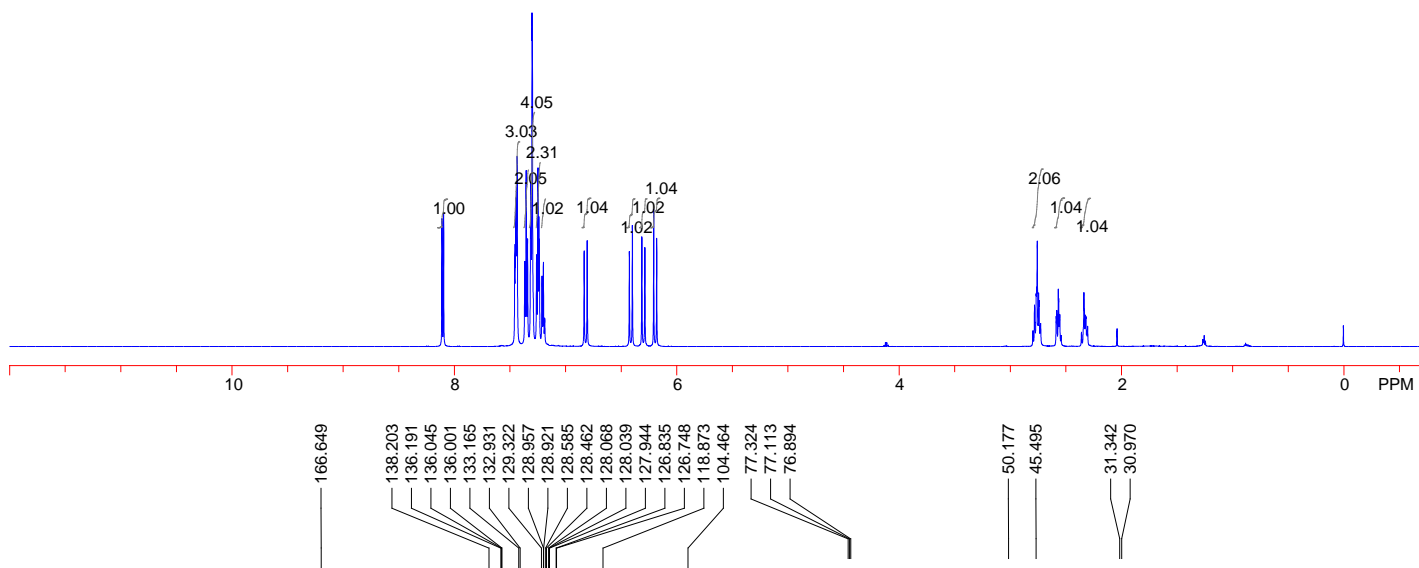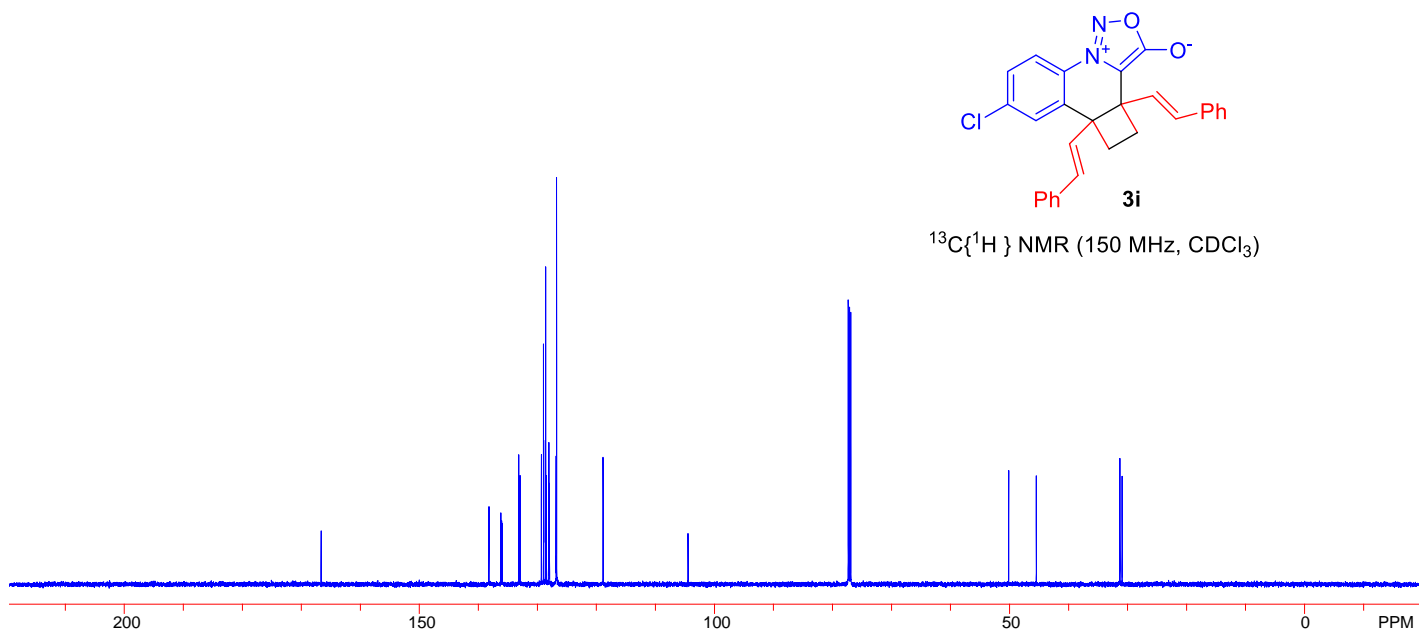

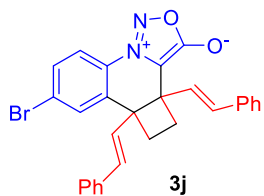

$^1\text{H}$  NMR (600 MHz,  $\text{CDCl}_3$ )

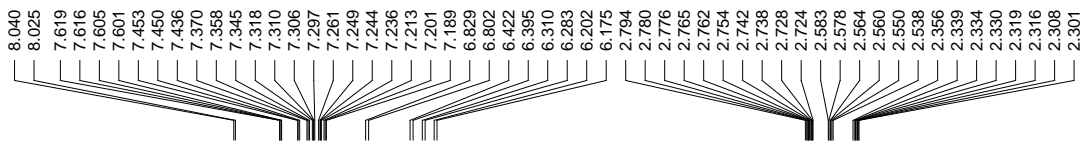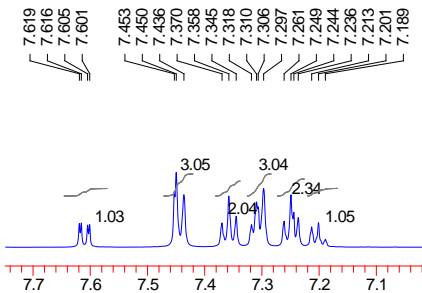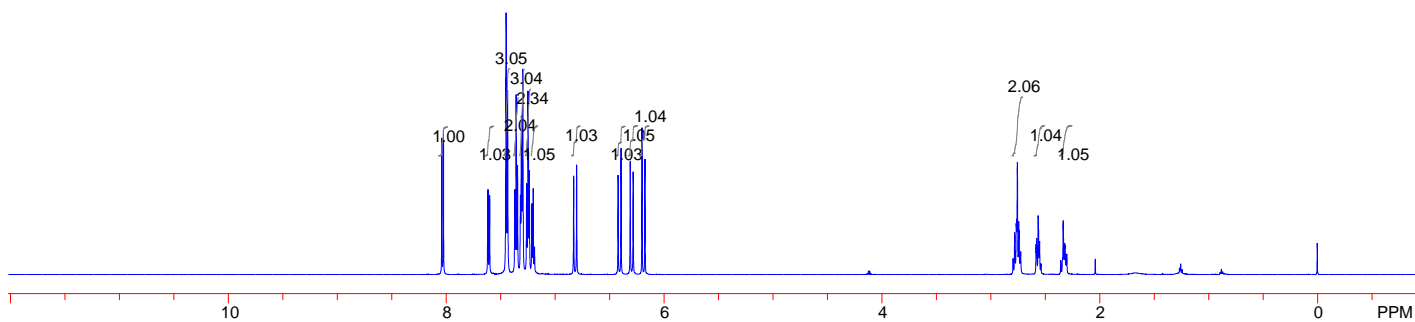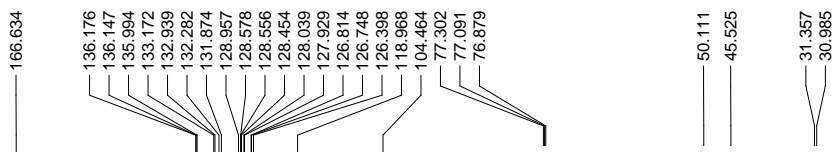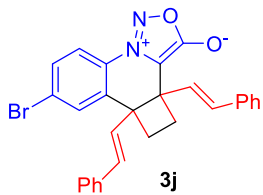

$^{13}\text{C}\{^1\text{H}\}$  NMR (150 MHz,  $\text{CDCl}_3$ )

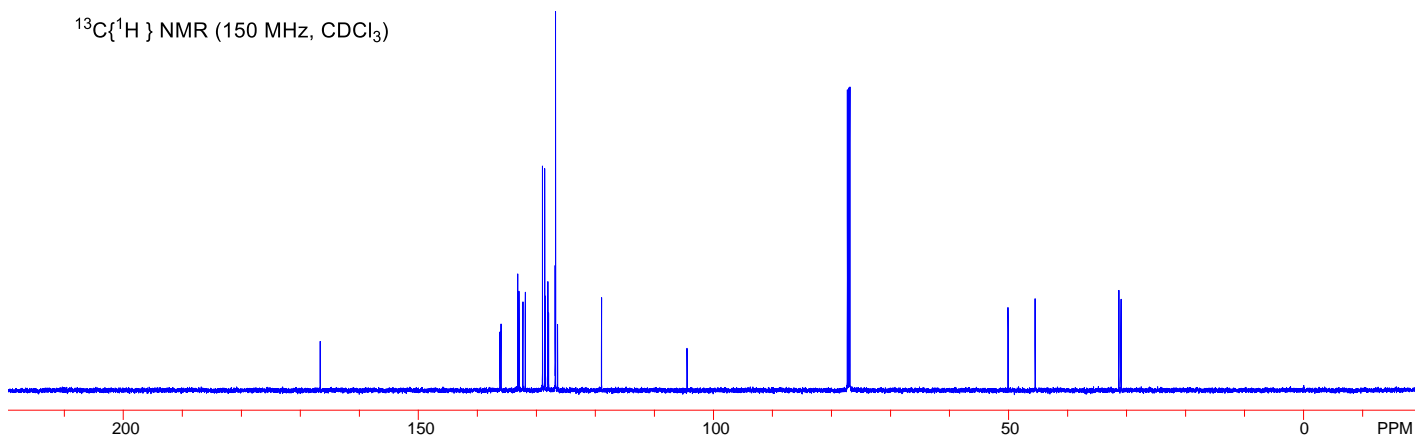

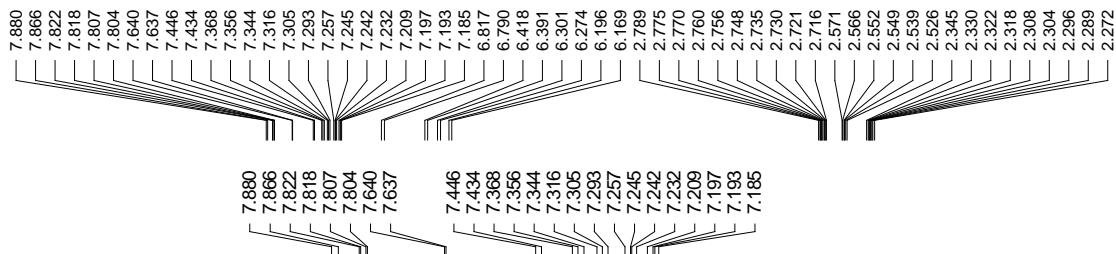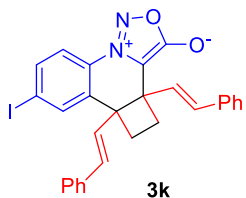

$^1\text{H}$  NMR (600 MHz,  $\text{CDCl}_3$ )

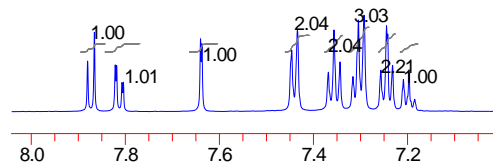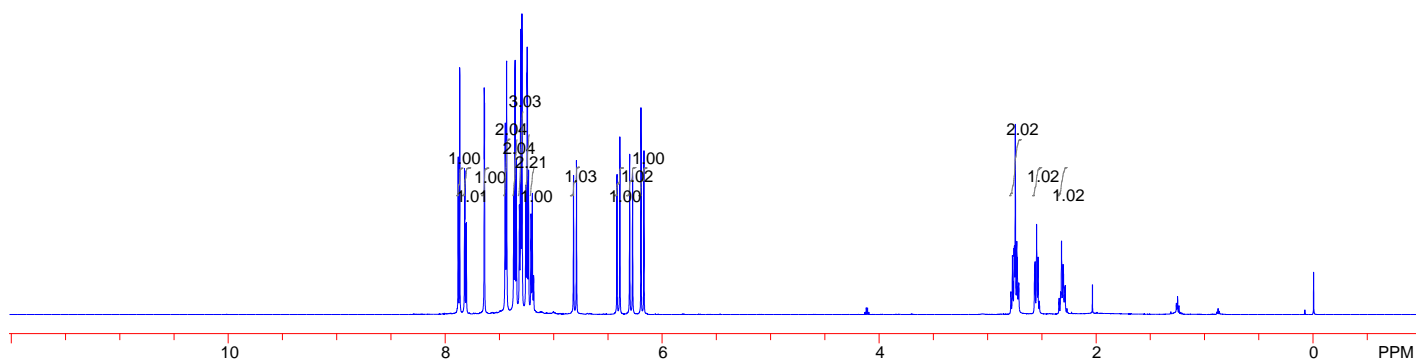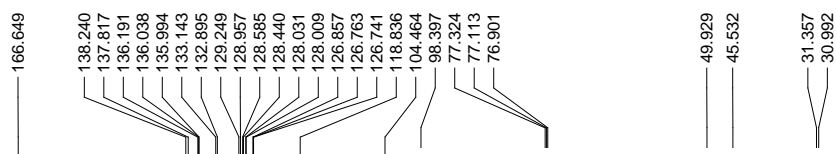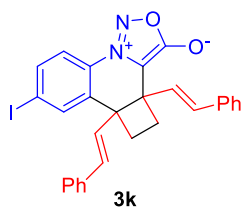

$^{13}\text{C}\{^1\text{H}\}$  NMR (150 MHz,  $\text{CDCl}_3$ )

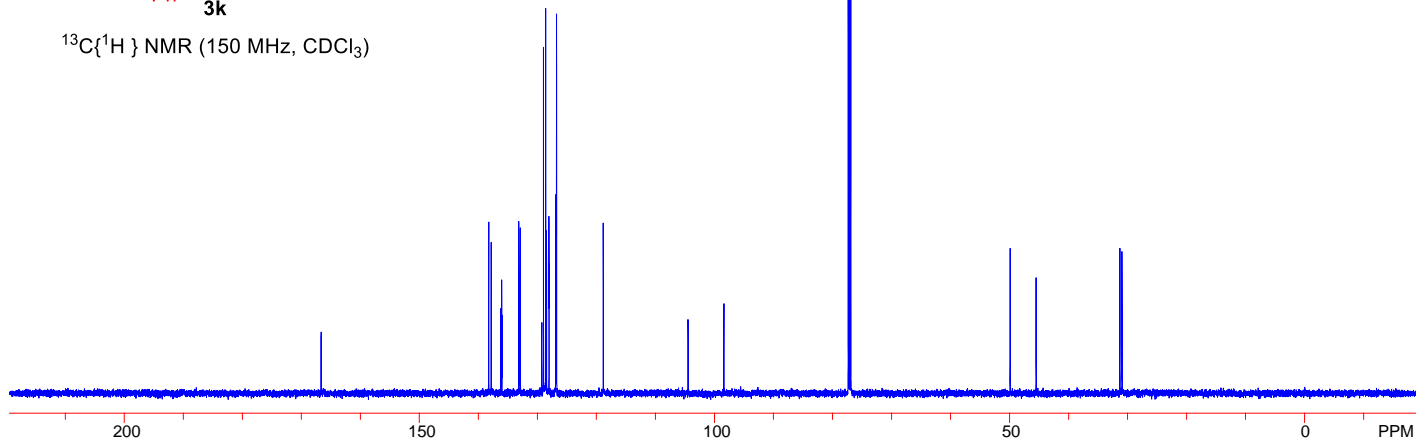

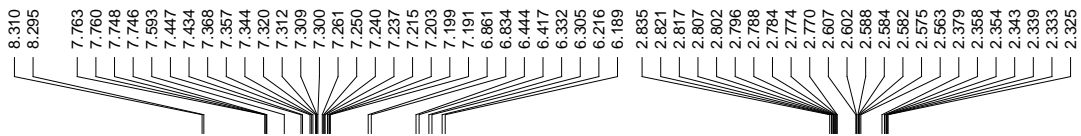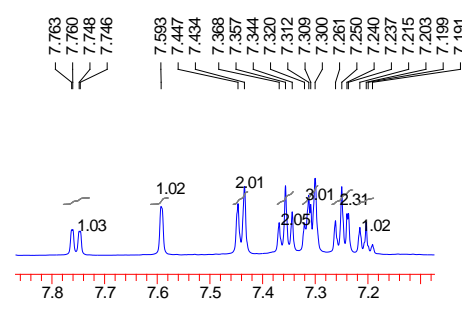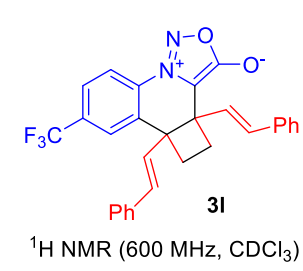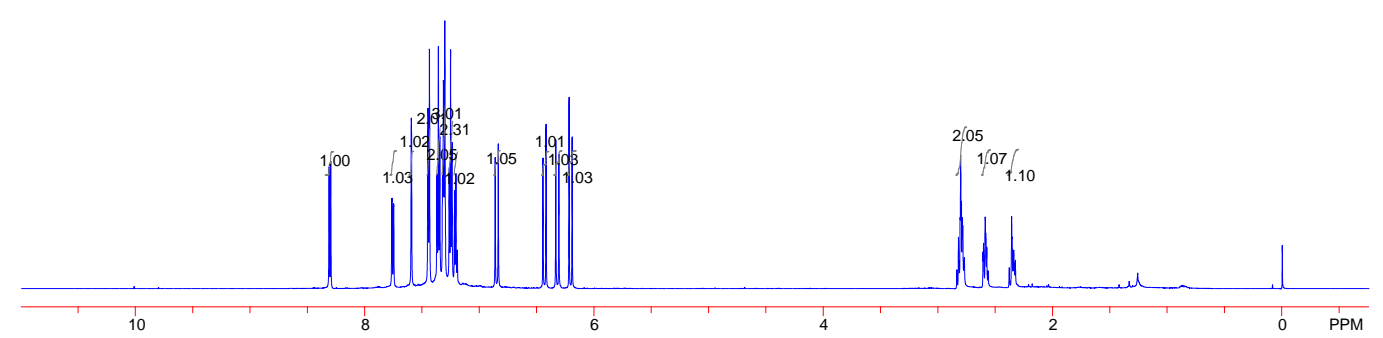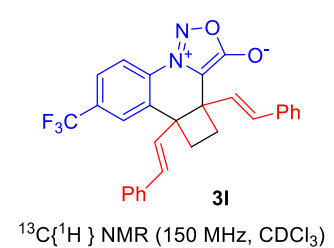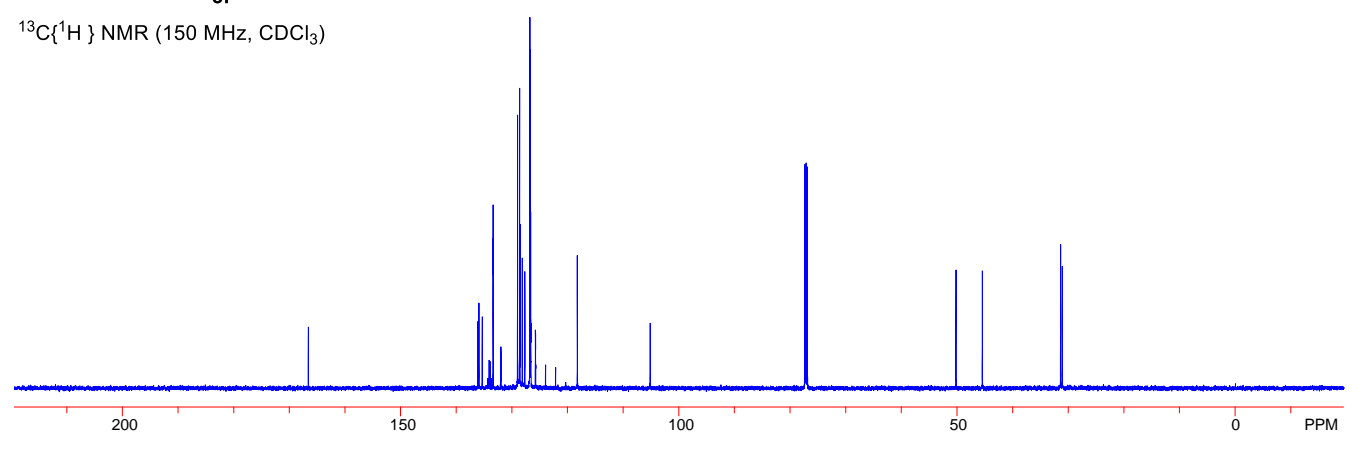

62.925

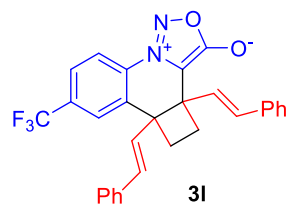

<sup>19</sup>F NMR (565 MHz, CDCl<sub>3</sub>)

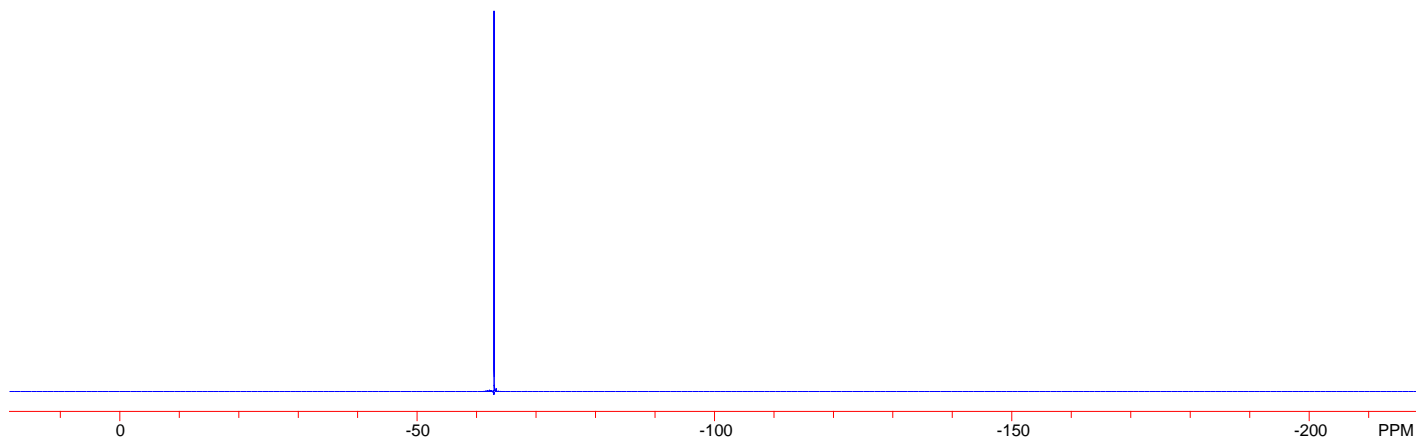

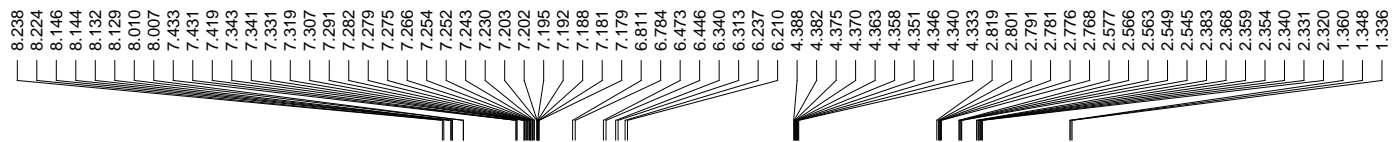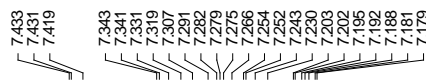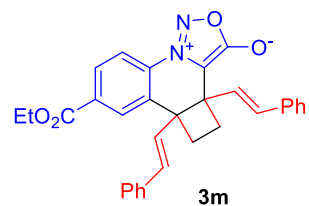

$^1\text{H}$  NMR (600 MHz,  $\text{CDCl}_3$ )

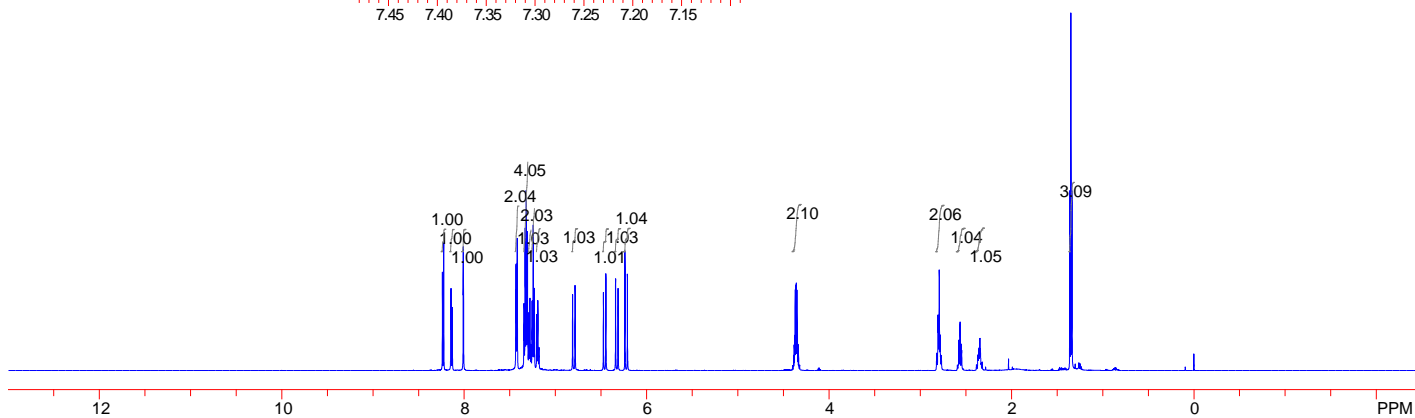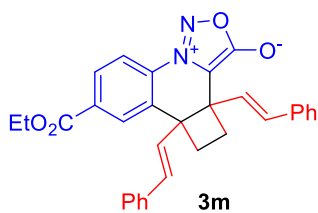

$^{13}\text{C}\{^1\text{H}\}$  NMR (150 MHz,  $\text{CDCl}_3$ )

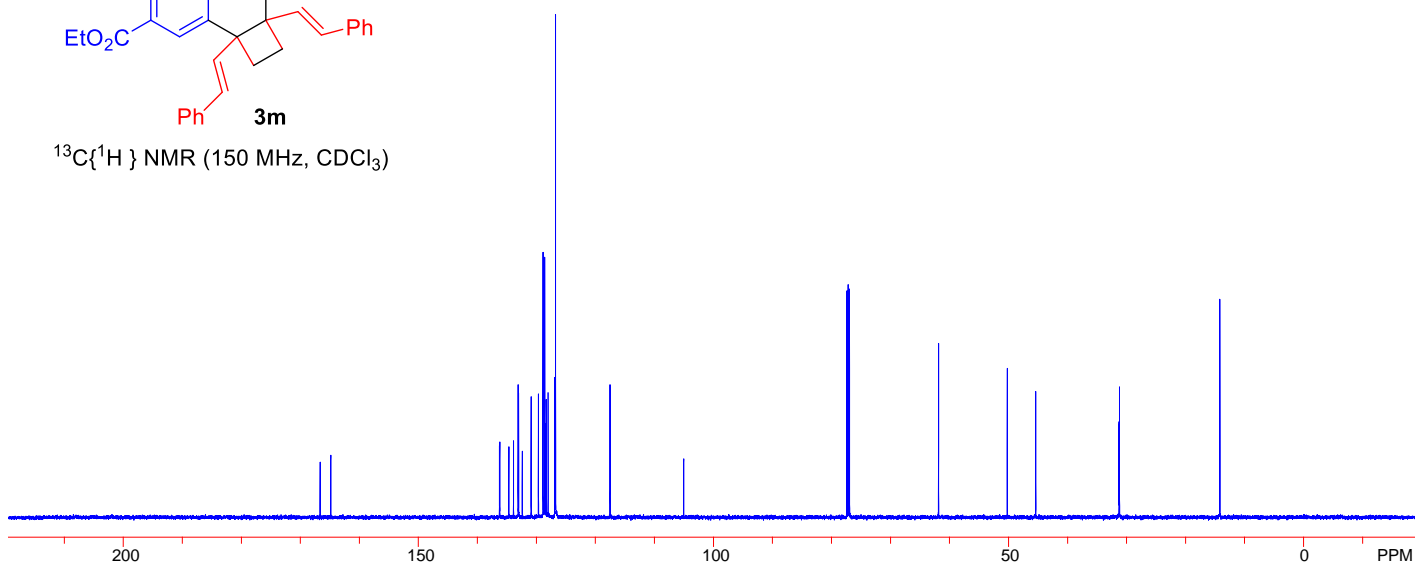

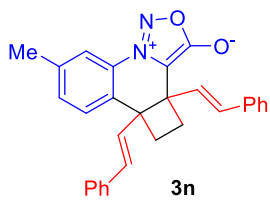

$^1\text{H}$  NMR (600 MHz,  $\text{CDCl}_3$ )

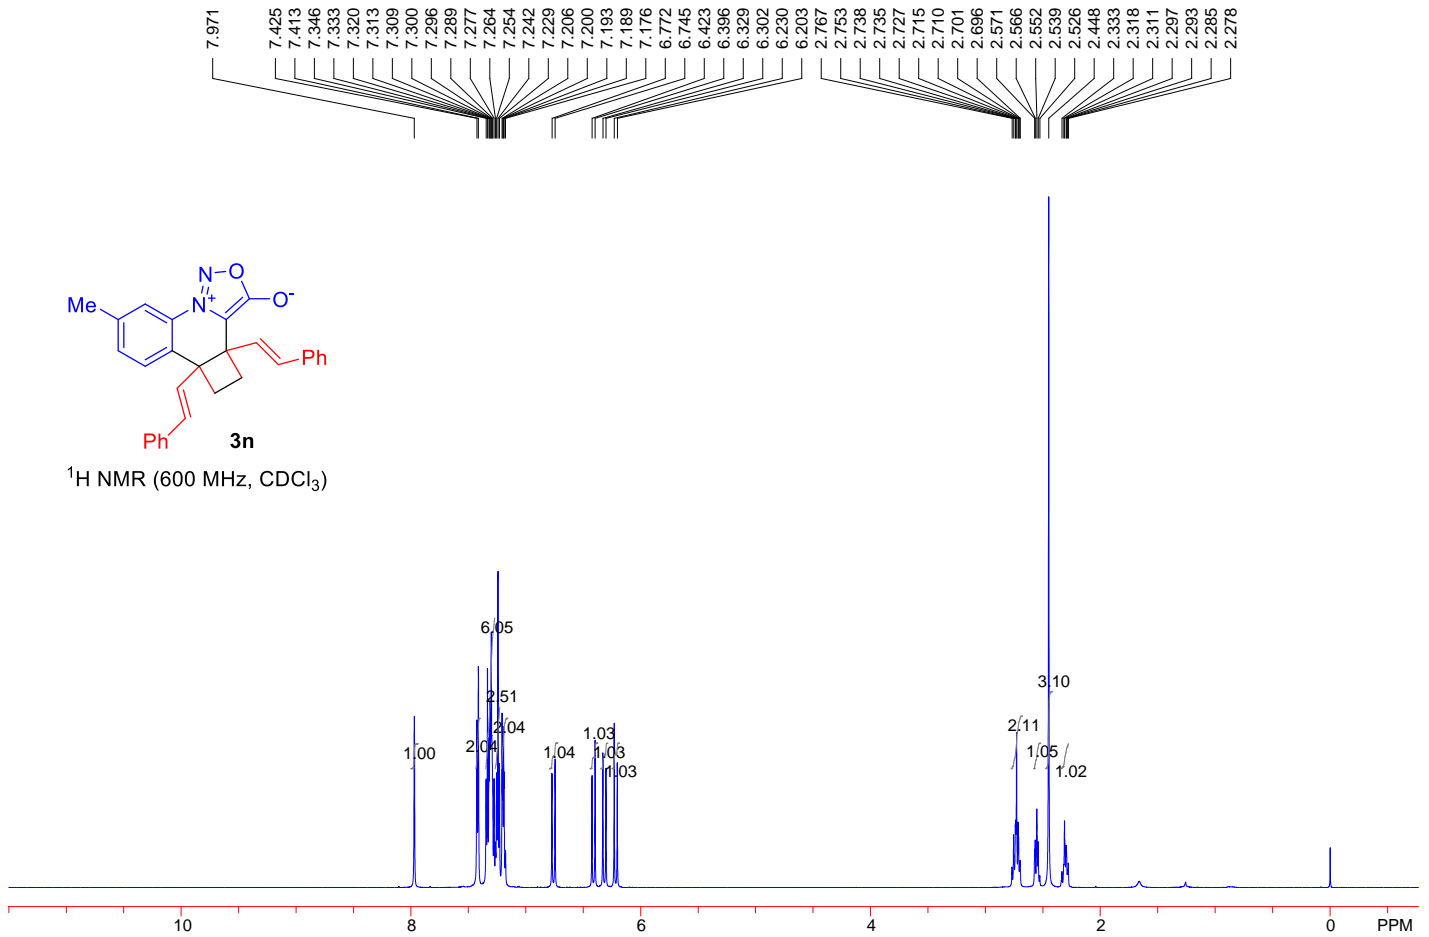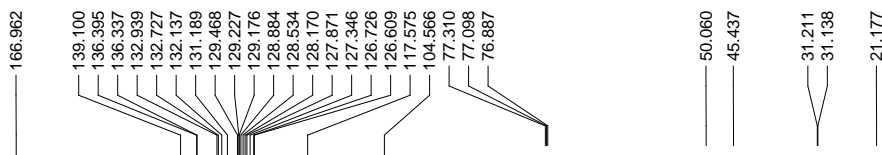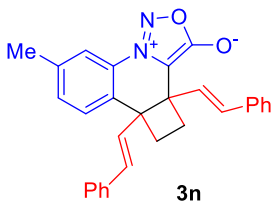

$^{13}\text{C}\{^1\text{H}\}$  NMR (150 MHz,  $\text{CDCl}_3$ )

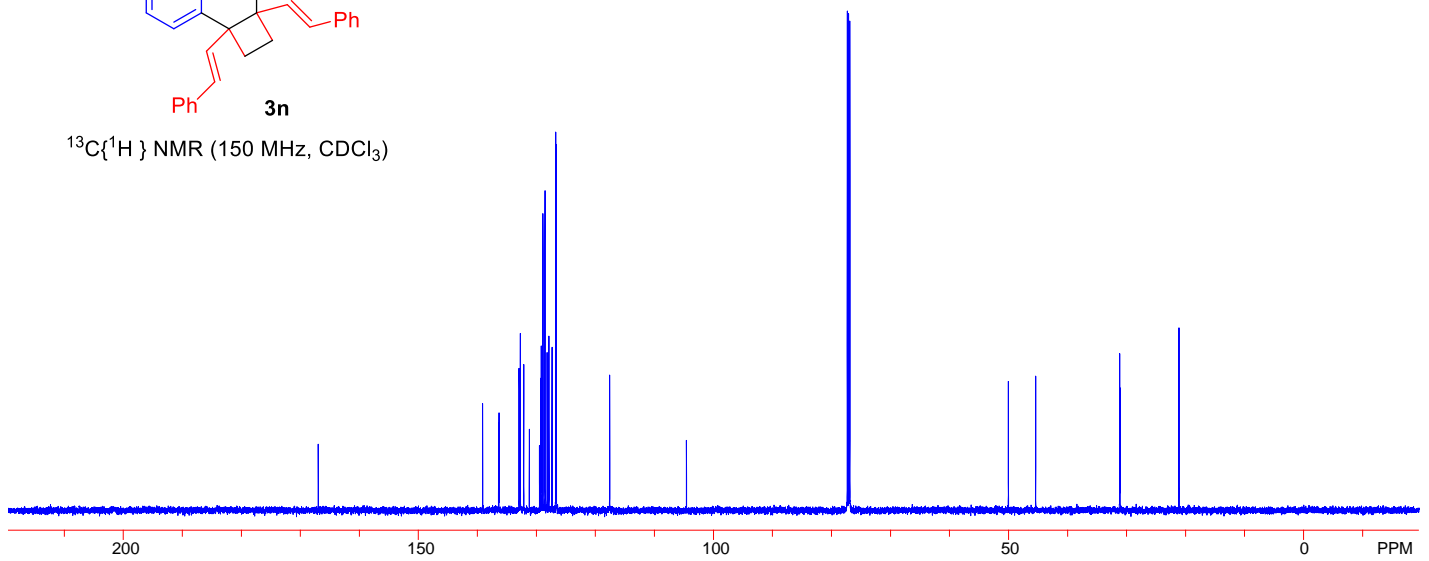



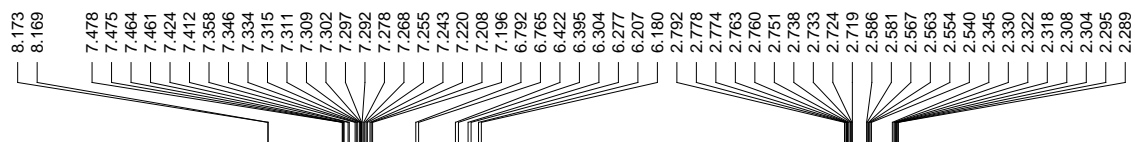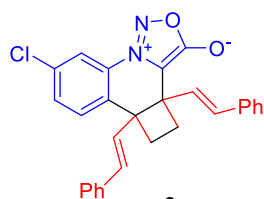

**3o**  
 $^1\text{H NMR}$  (600 MHz,  $\text{CDCl}_3$ )

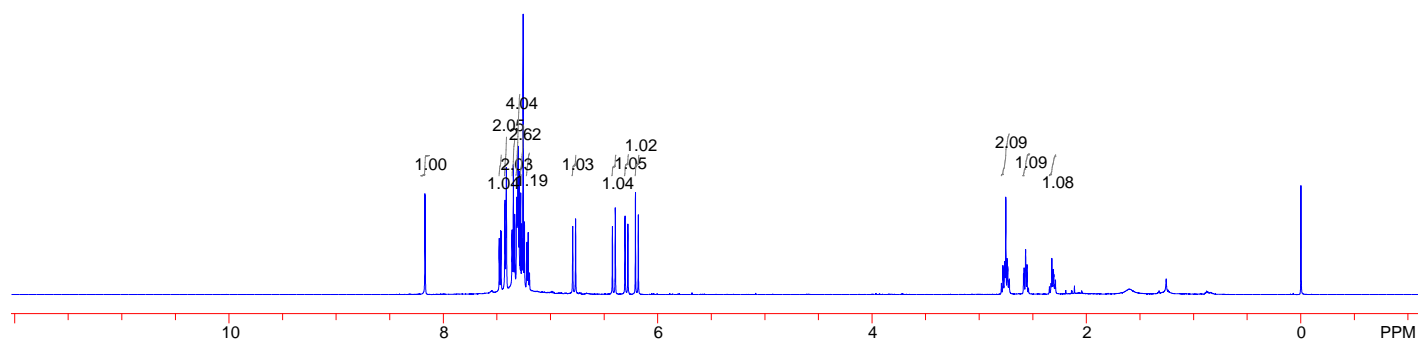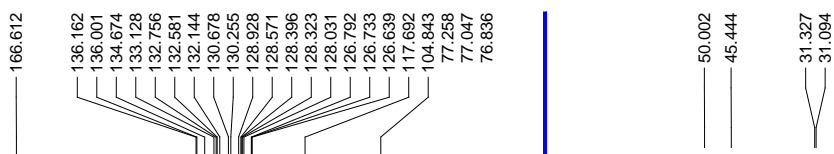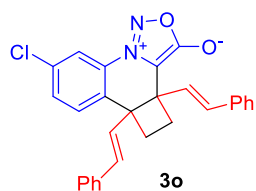

**3o**  
 $^{13}\text{C}\{^1\text{H}\}$  NMR (150 MHz,  $\text{CDCl}_3$ )

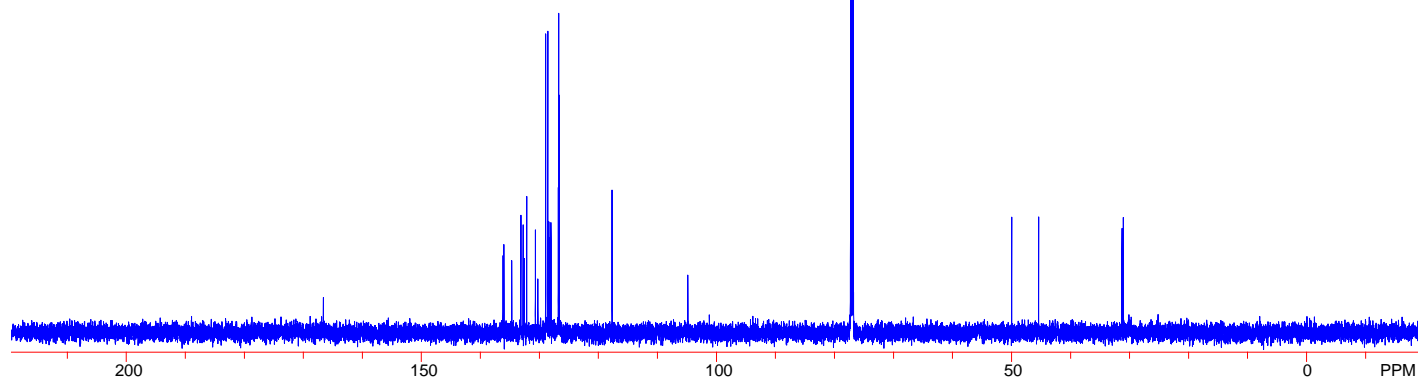

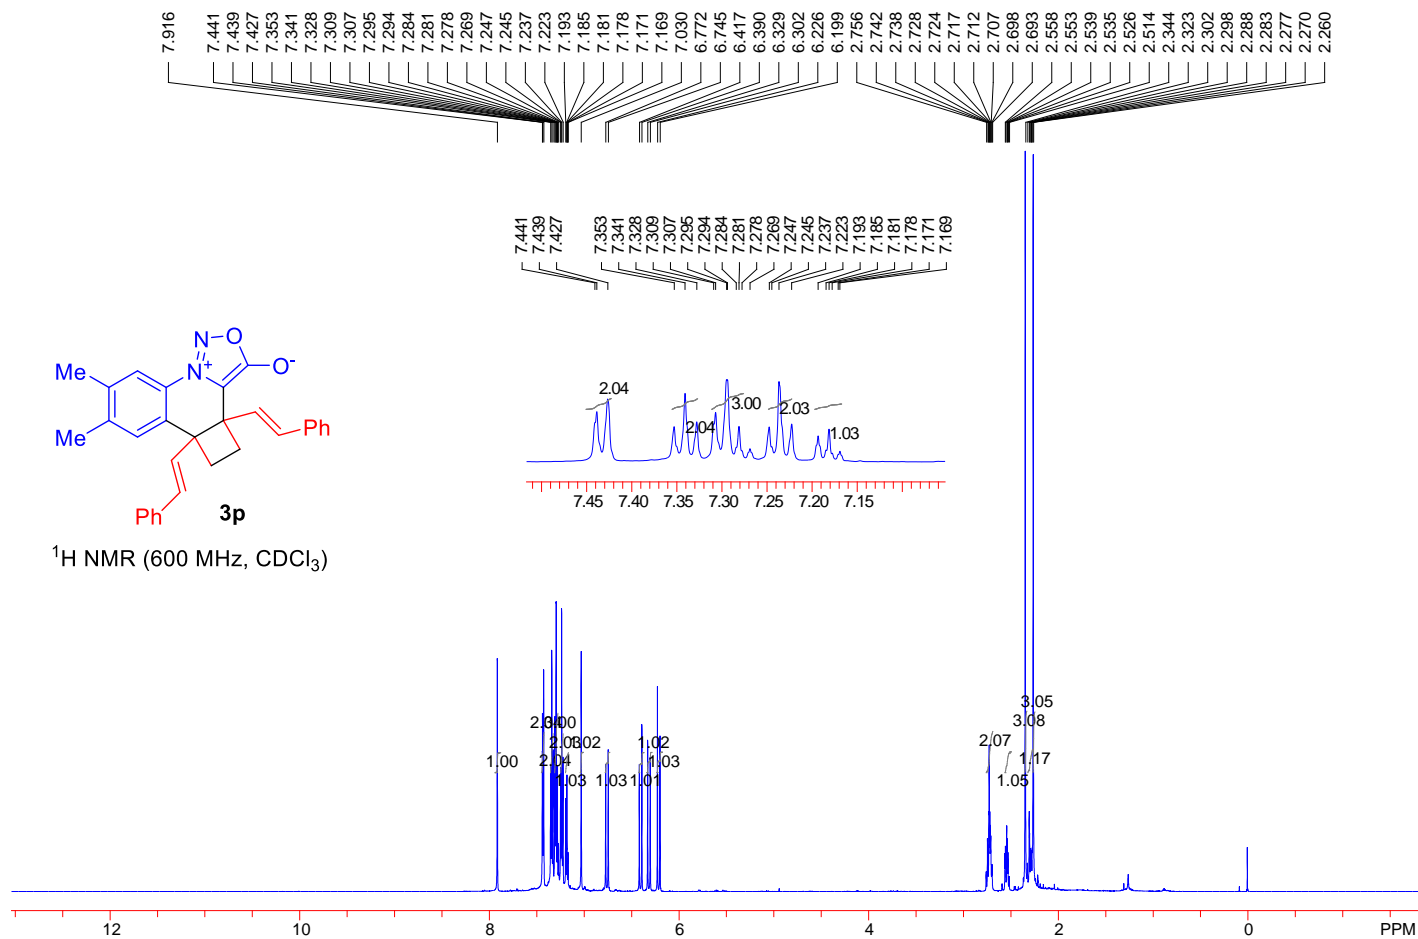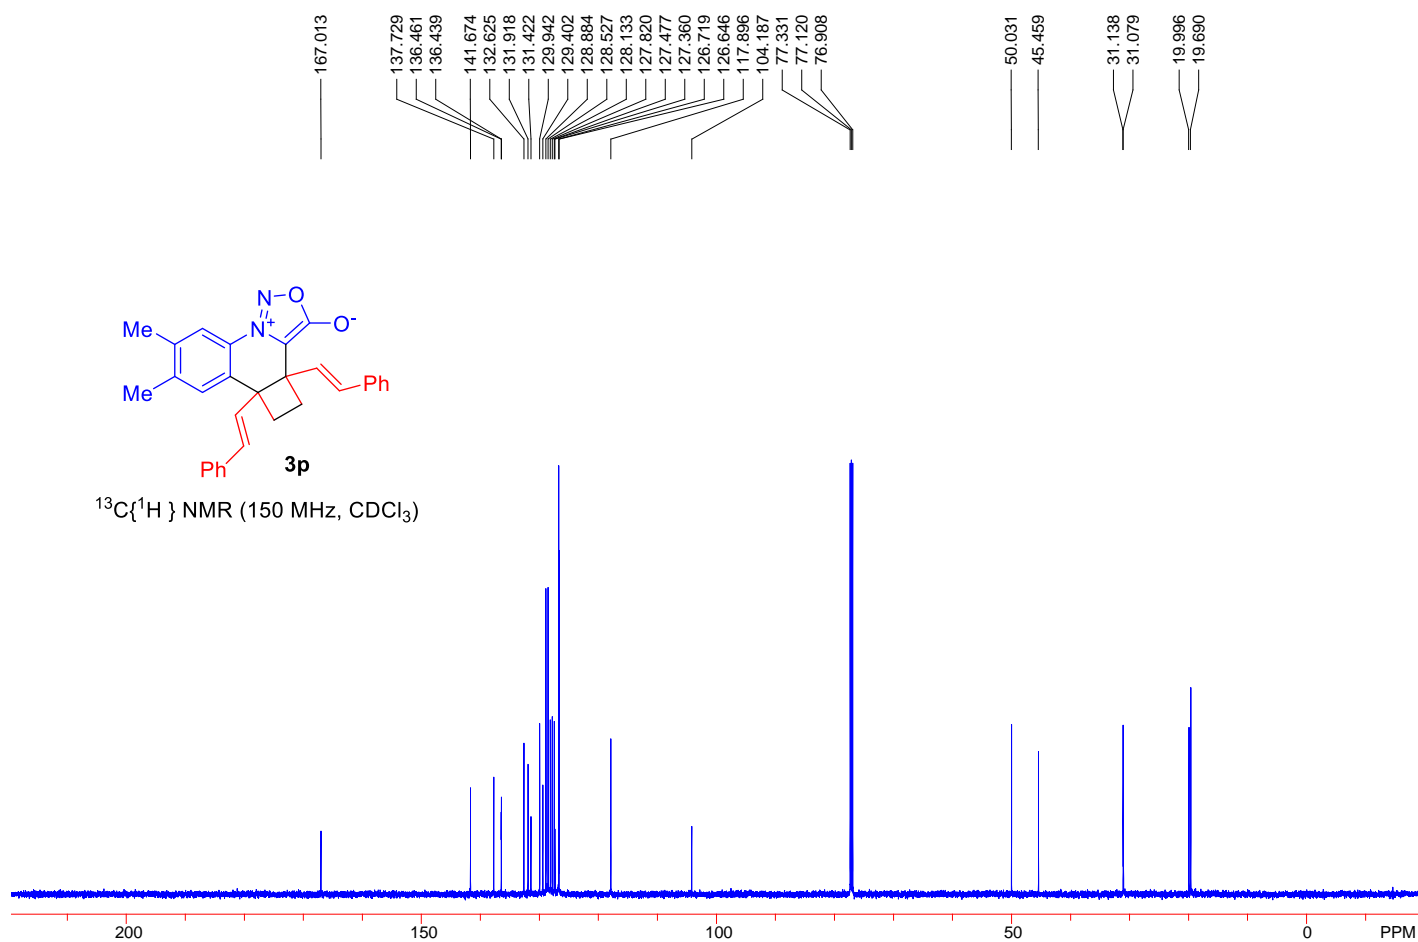

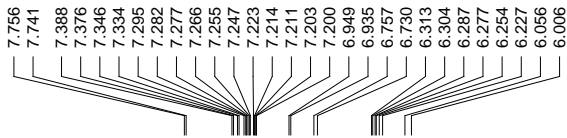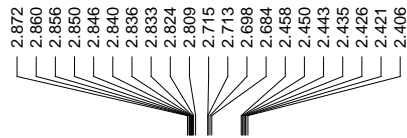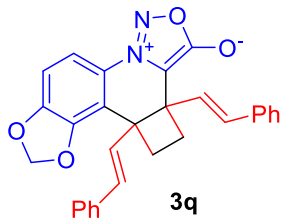

$^1\text{H}$  NMR (600 MHz,  $\text{CDCl}_3$ )

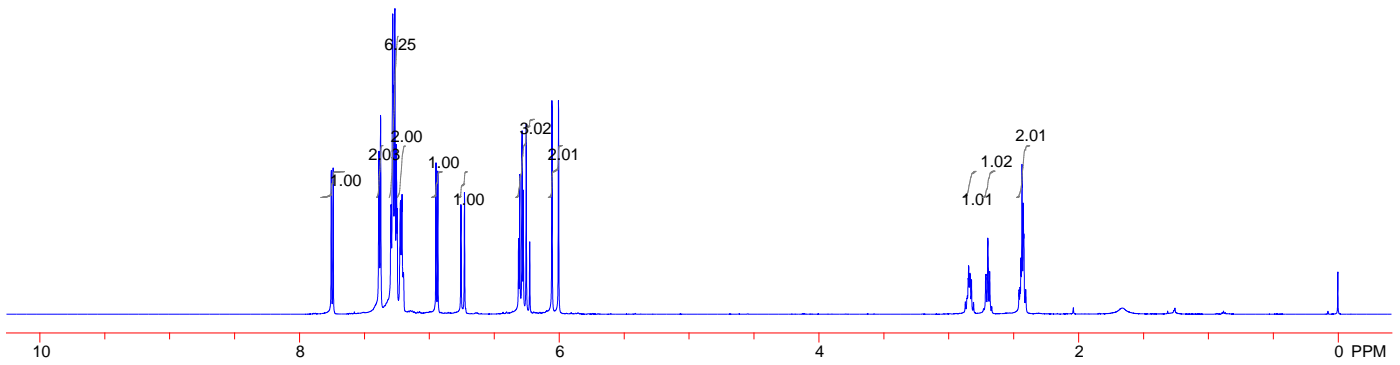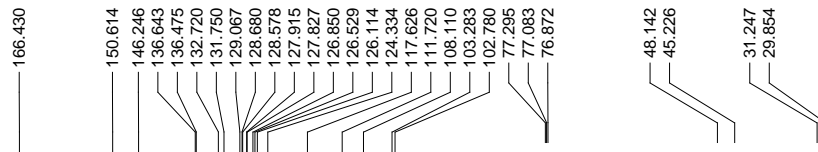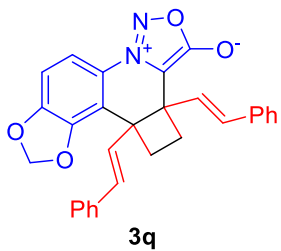

$^{13}\text{C}\{^1\text{H}\}$  NMR (150 MHz,  $\text{CDCl}_3$ )

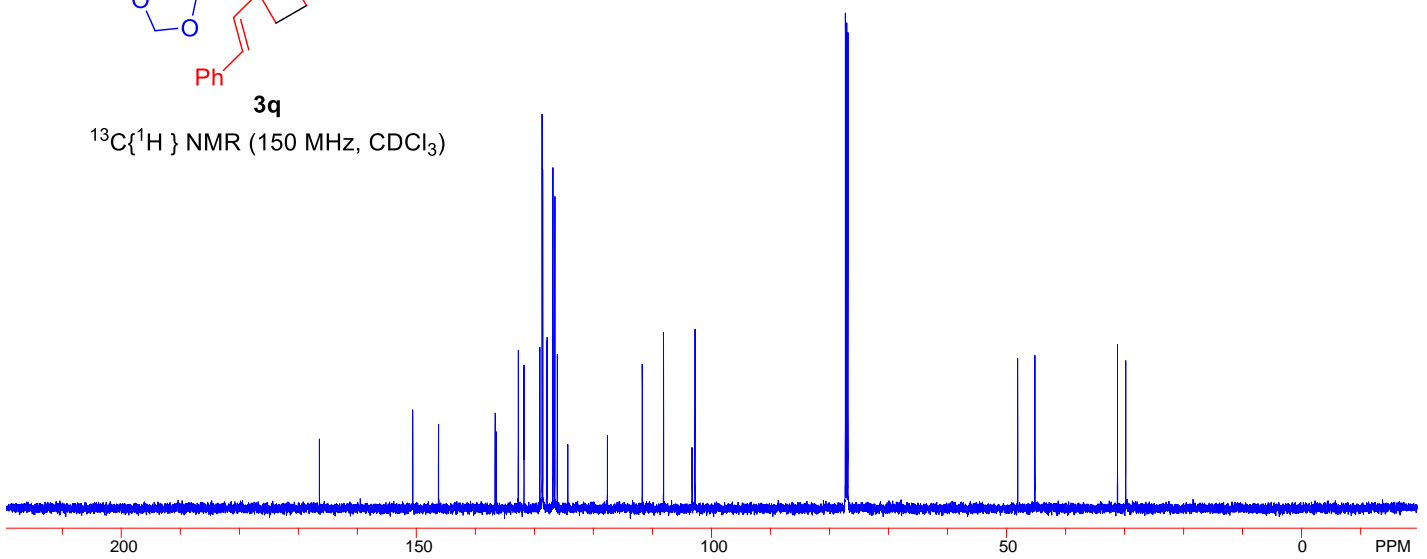

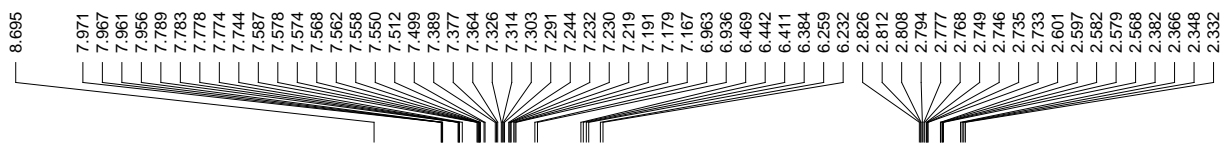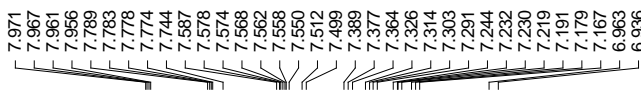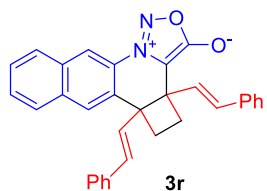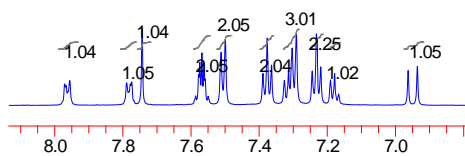

$^1\text{H}$  NMR (600 MHz,  $\text{CDCl}_3$ )

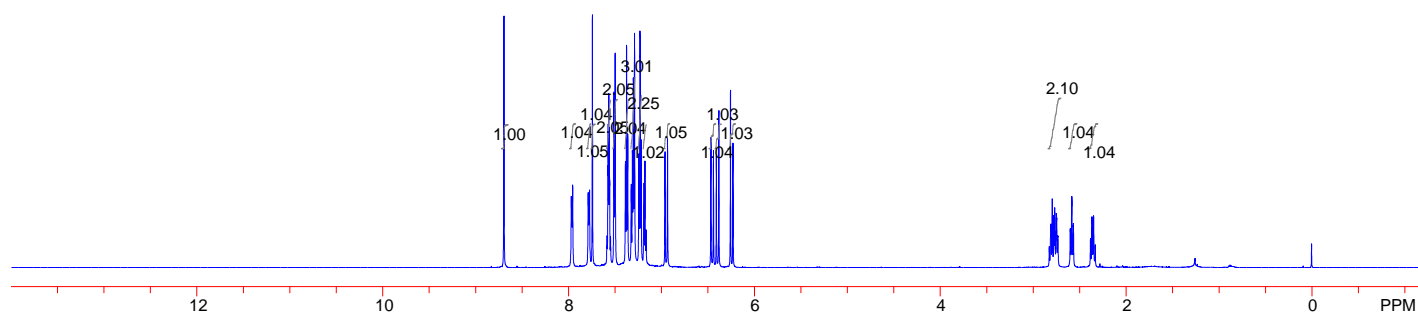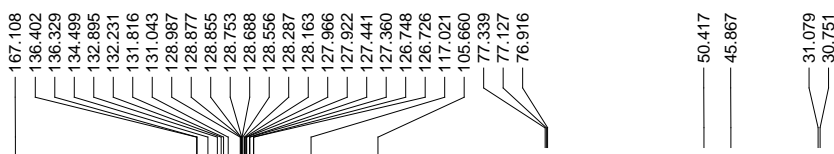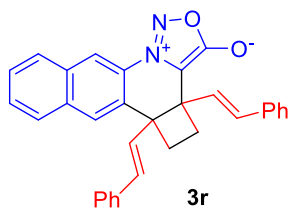

$^{13}\text{C}\{^1\text{H}\}$  NMR (150 MHz,  $\text{CDCl}_3$ )

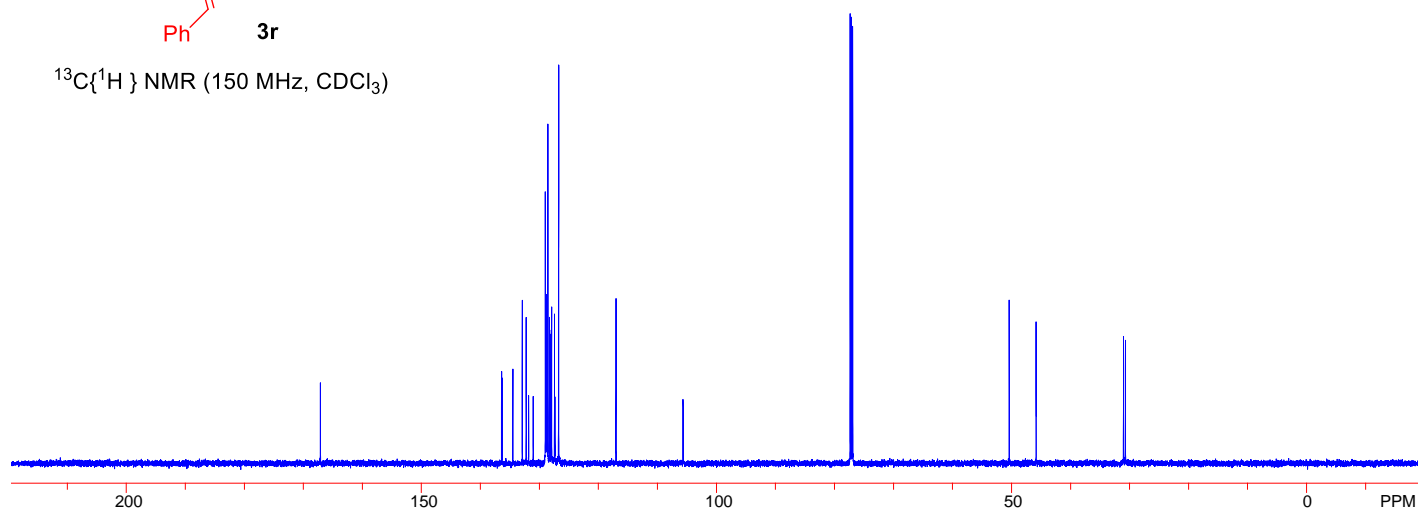

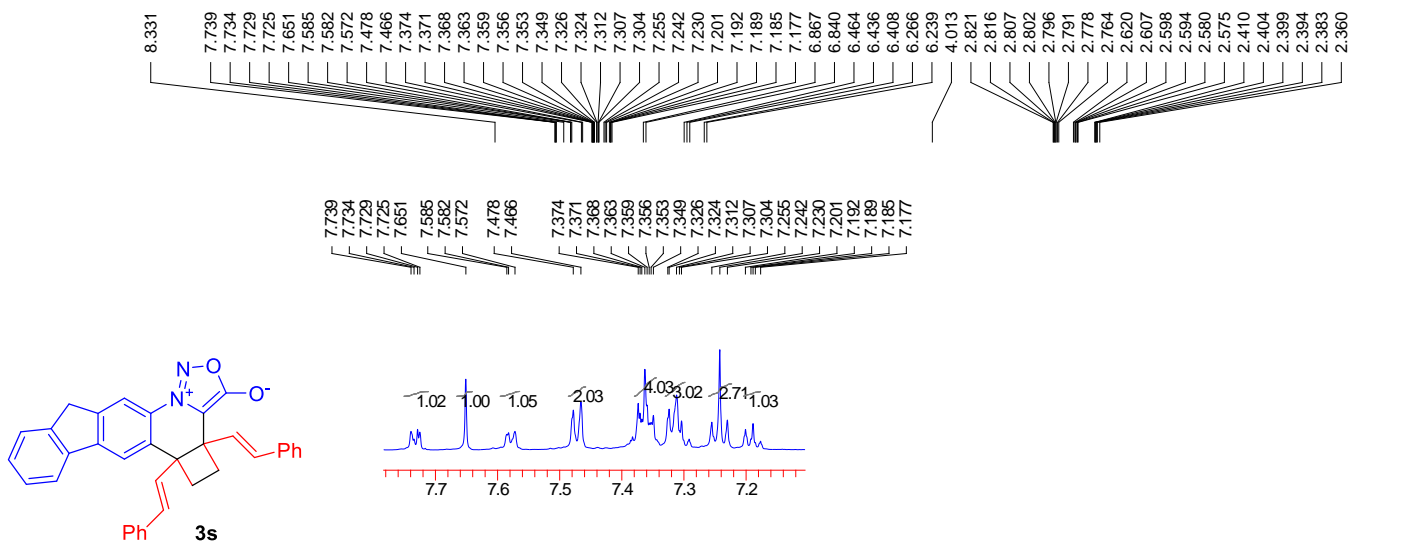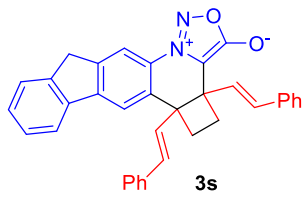

<sup>1</sup>H NMR (600 MHz, CDCl<sub>3</sub>)

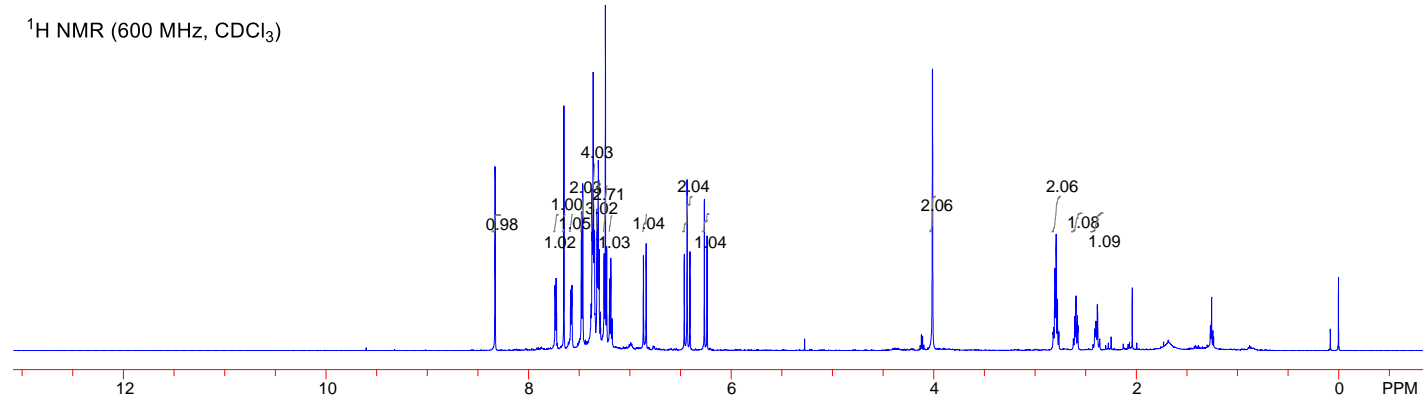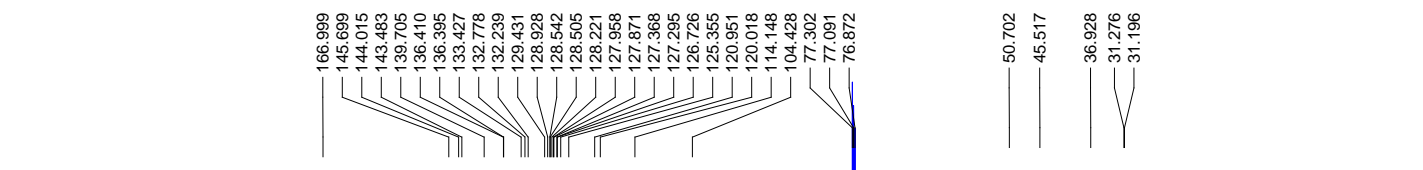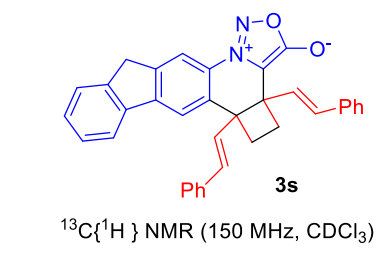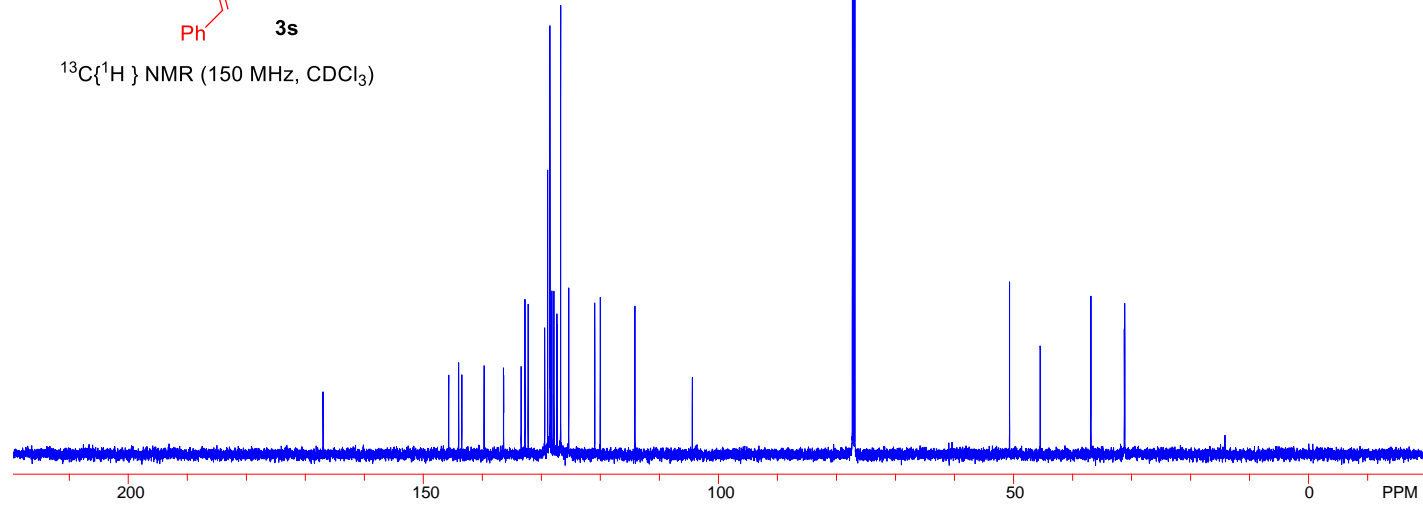

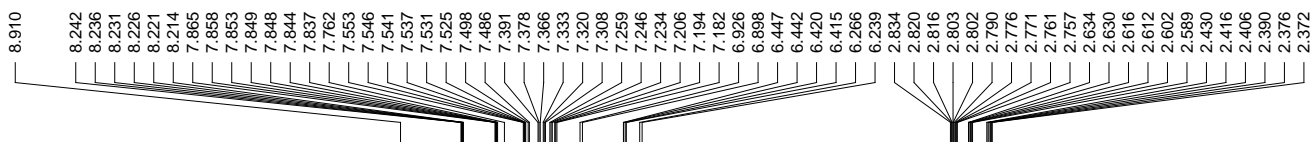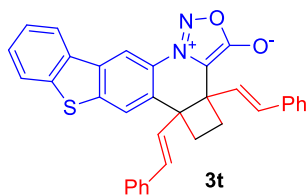

$^1\text{H NMR}$  (600 MHz,  $\text{CDCl}_3$ )

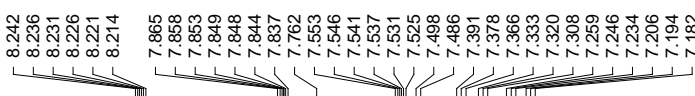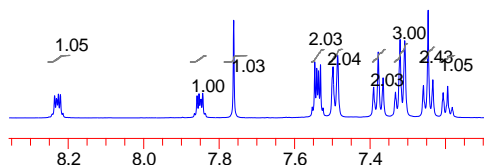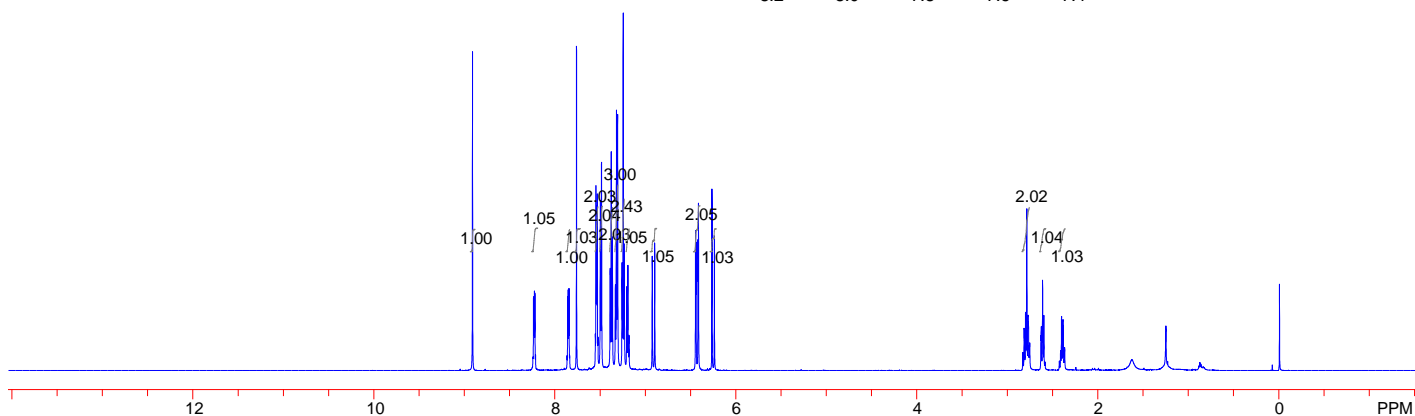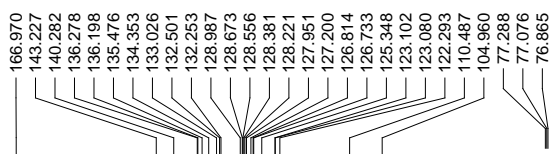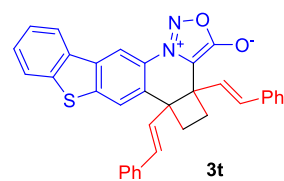

$^{13}\text{C}\{^1\text{H}\}$  NMR (150 MHz,  $\text{CDCl}_3$ )

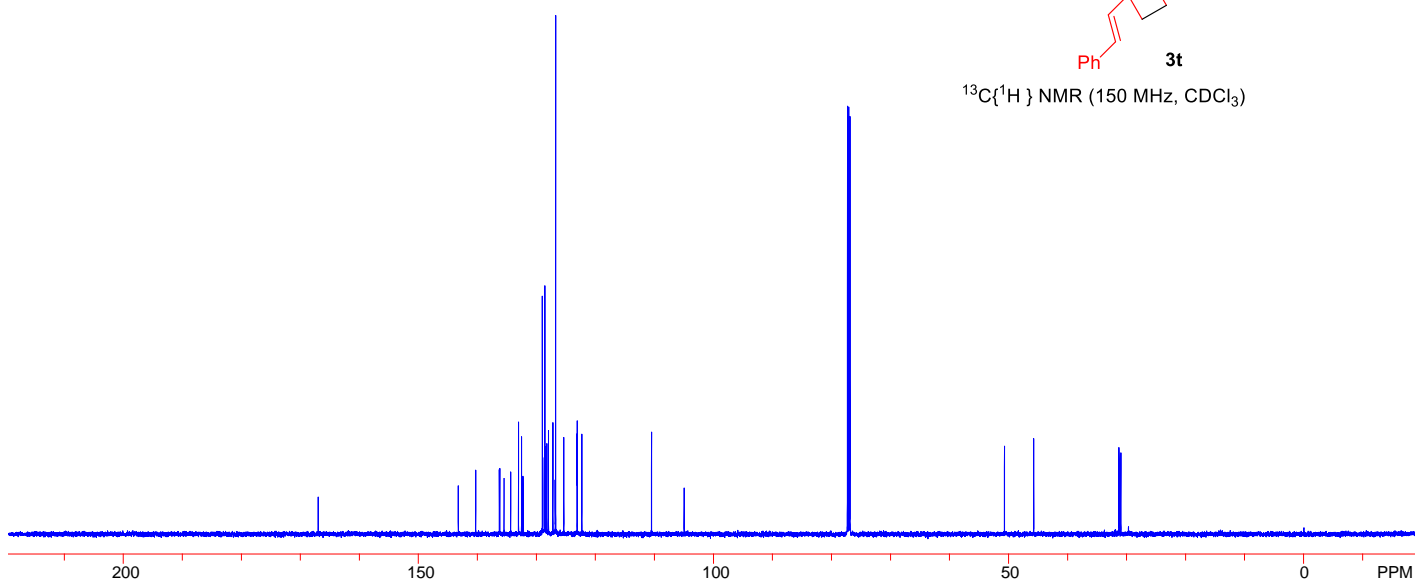

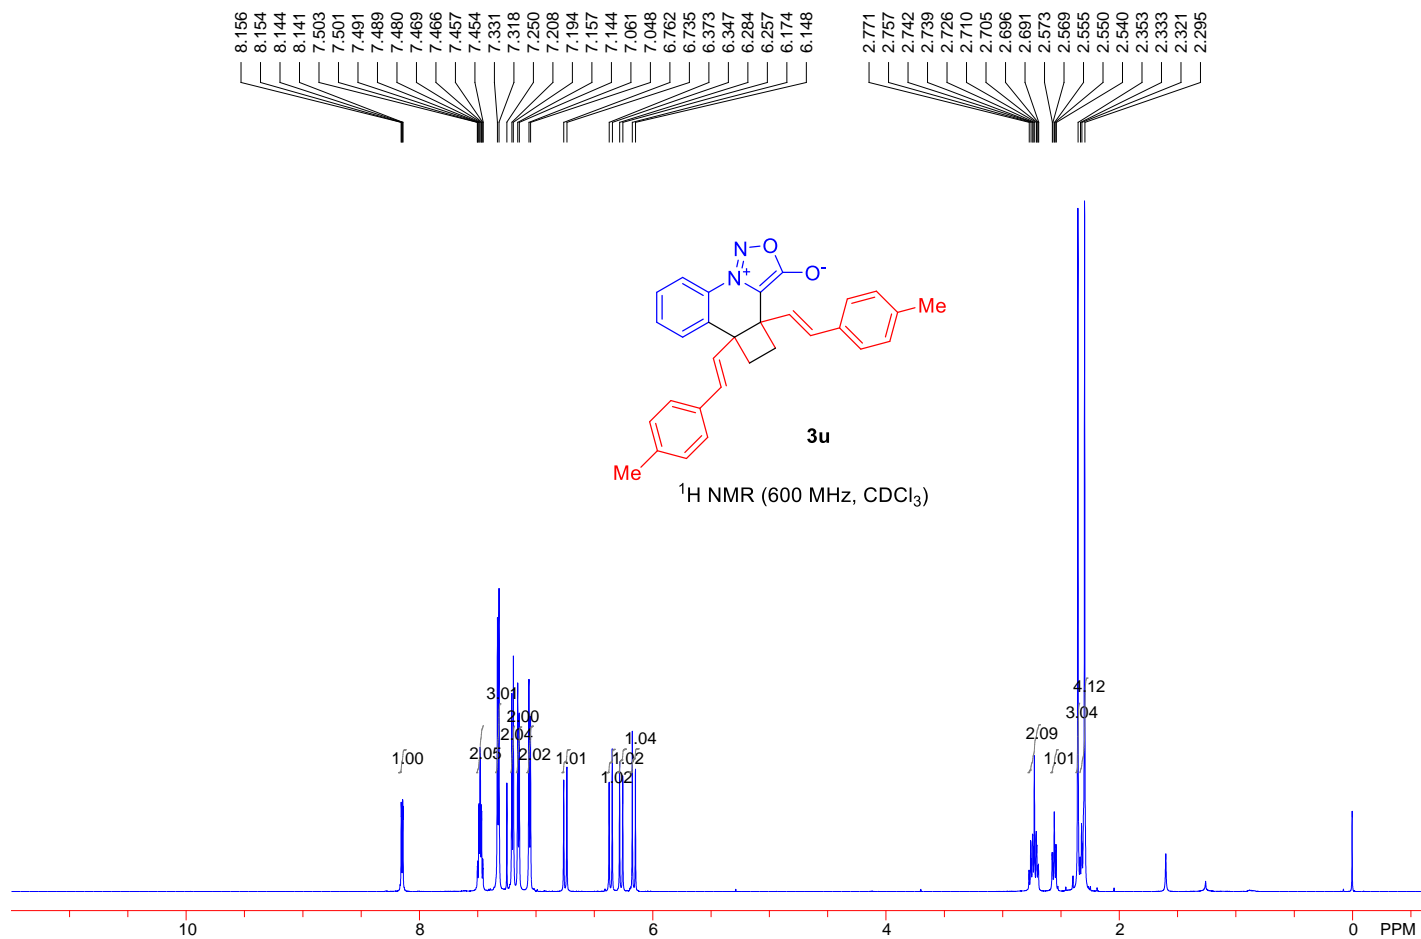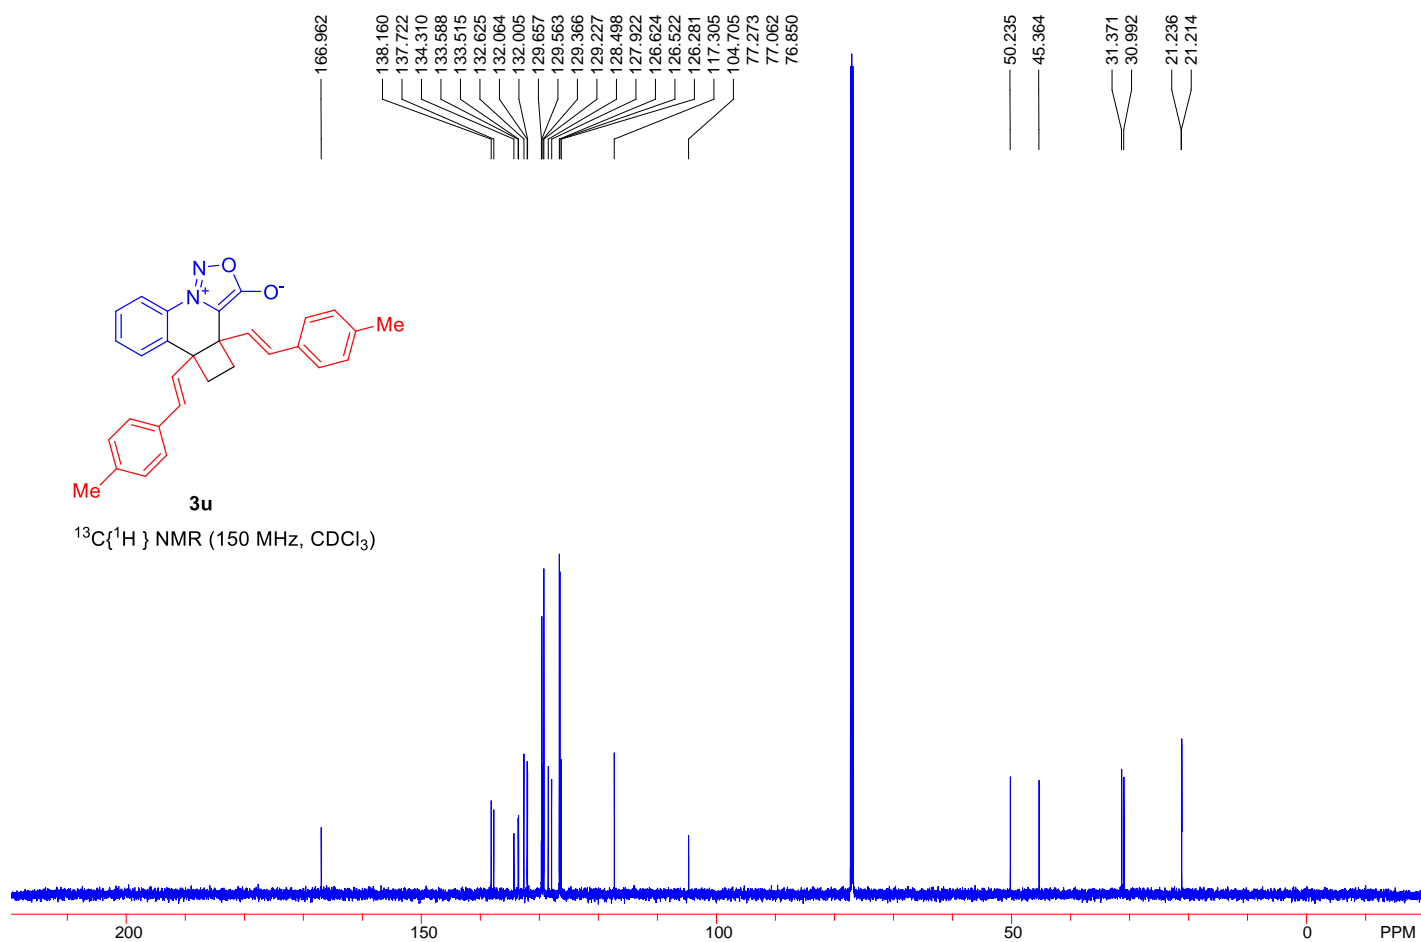

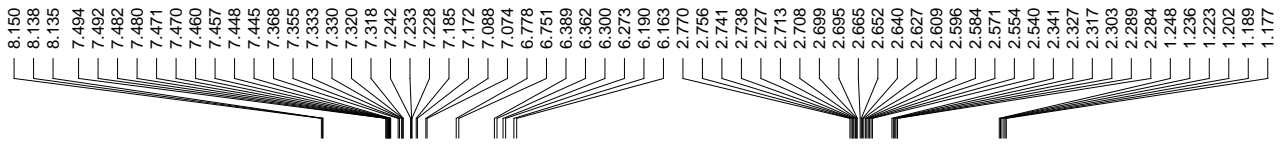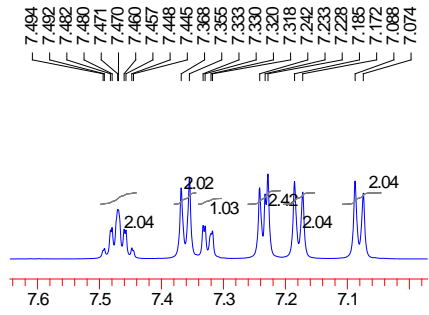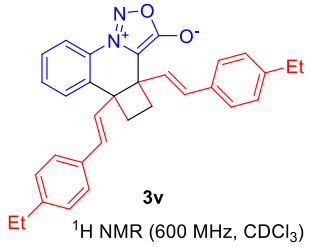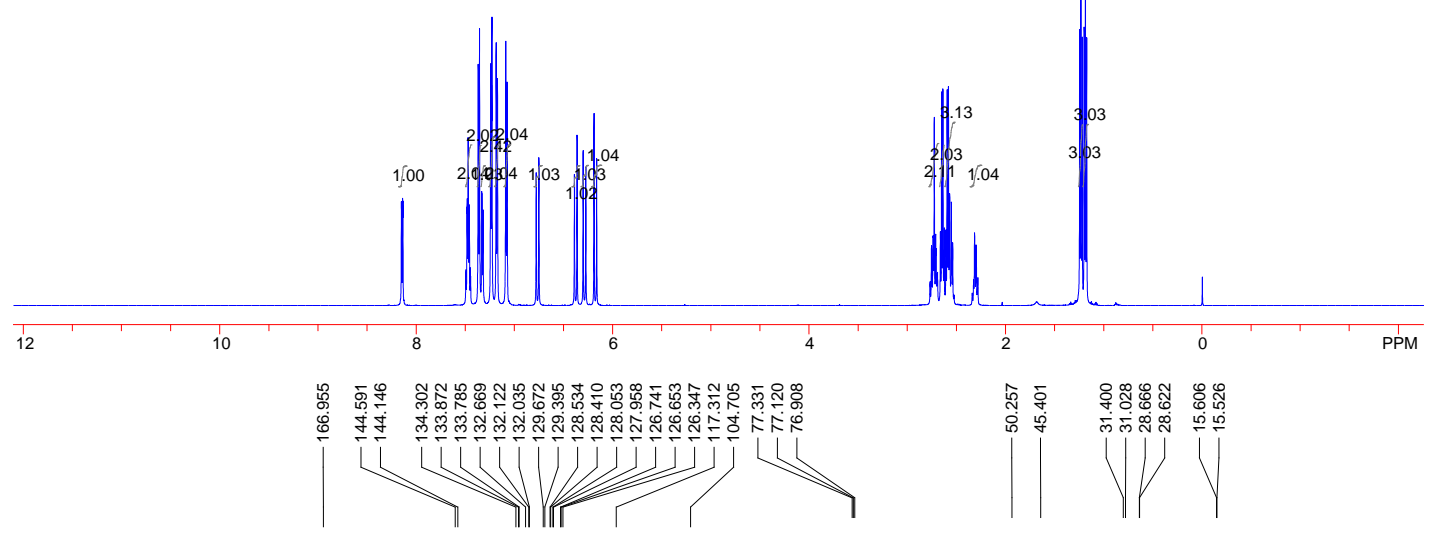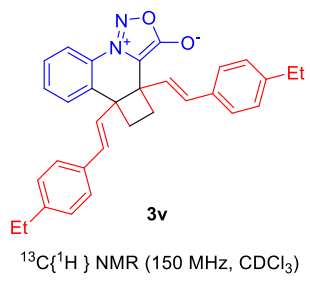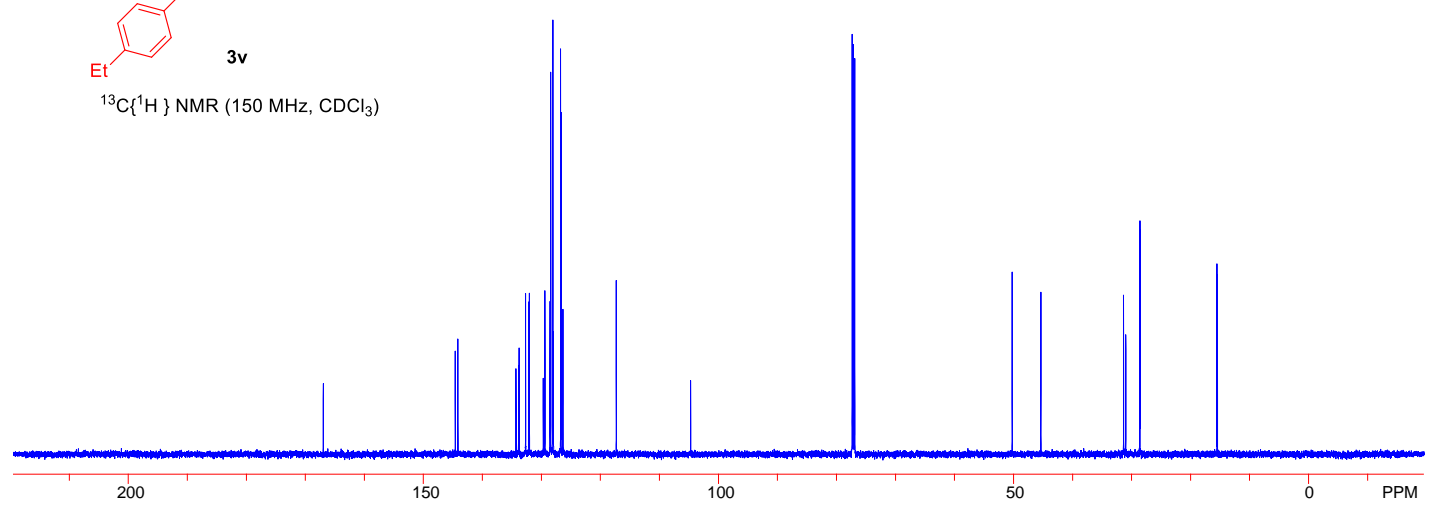



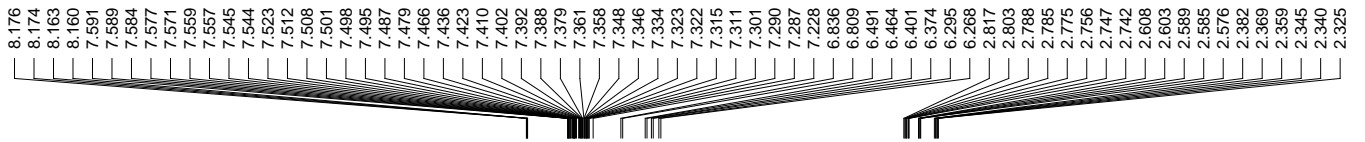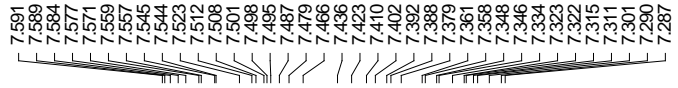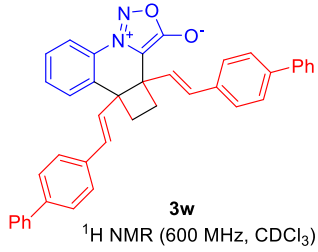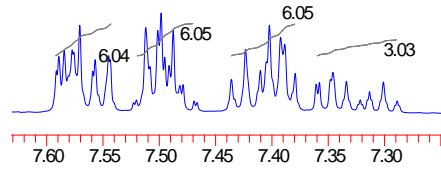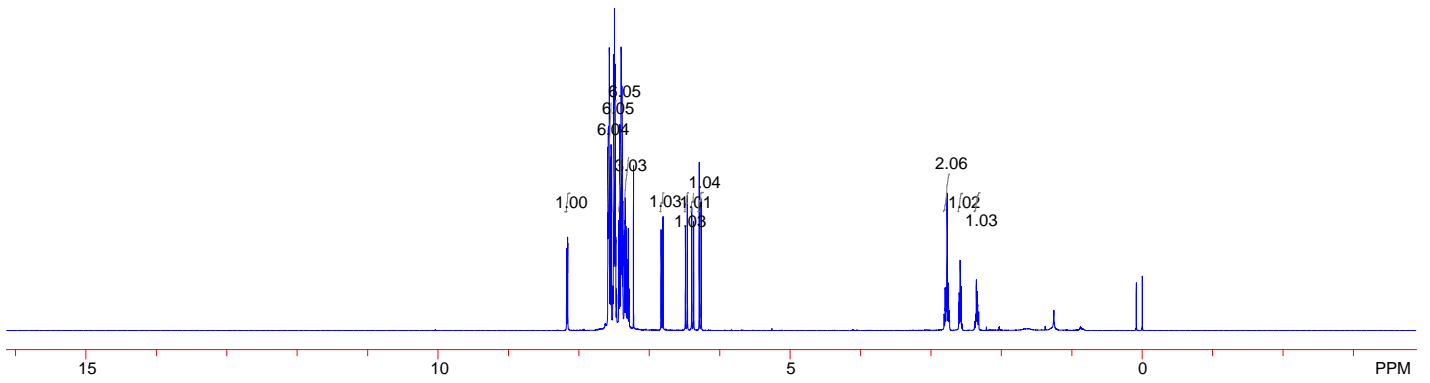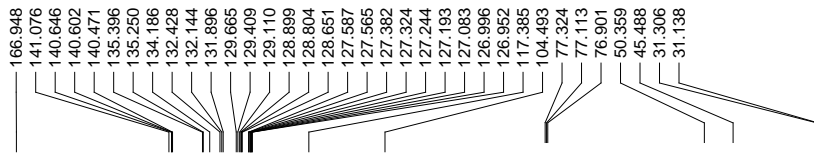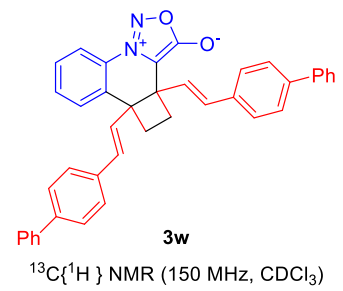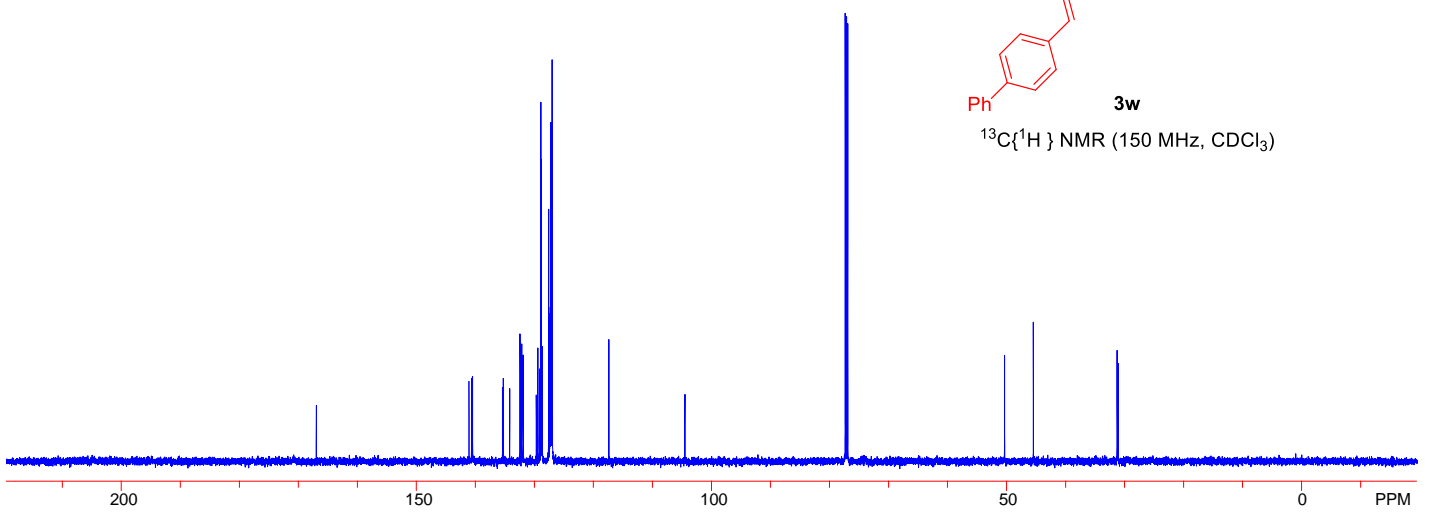

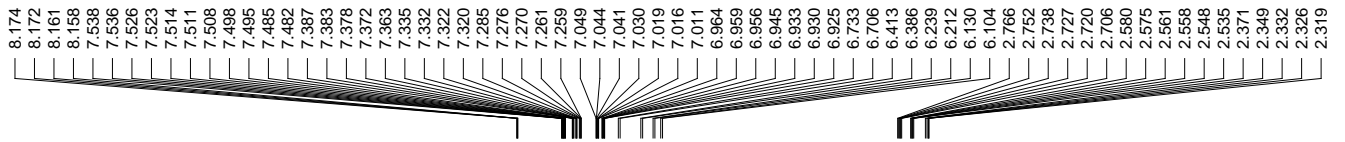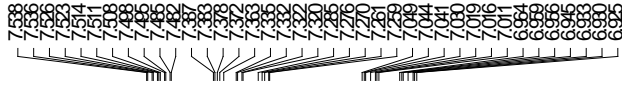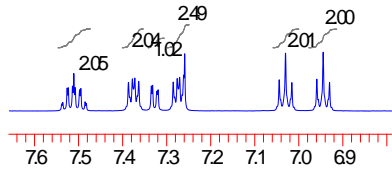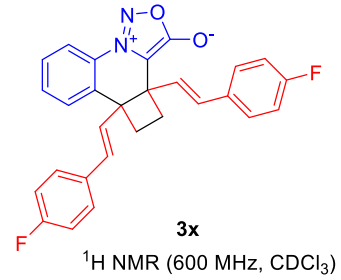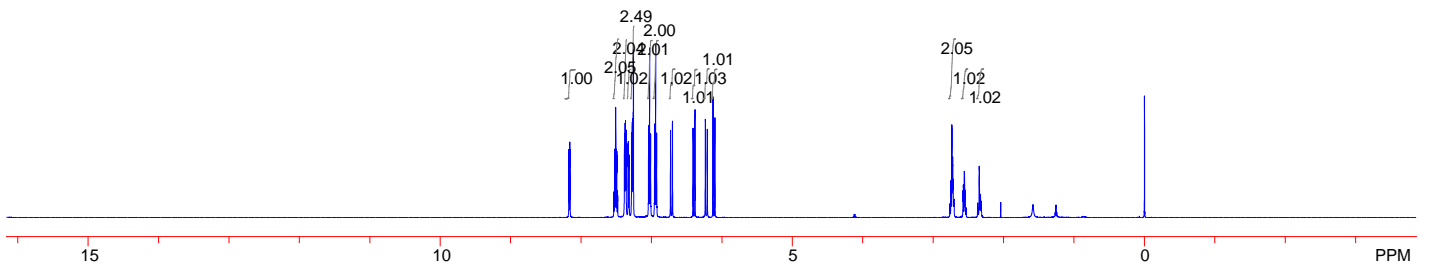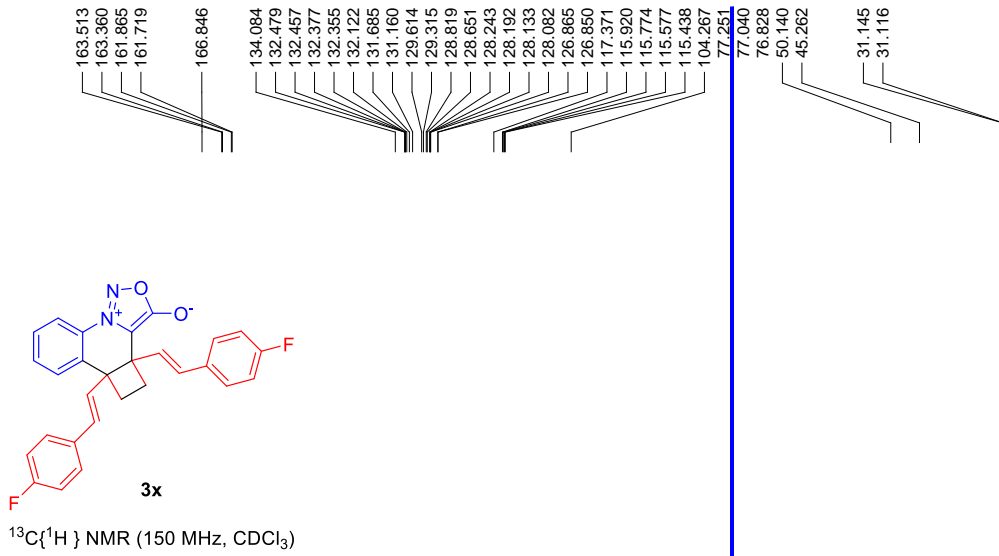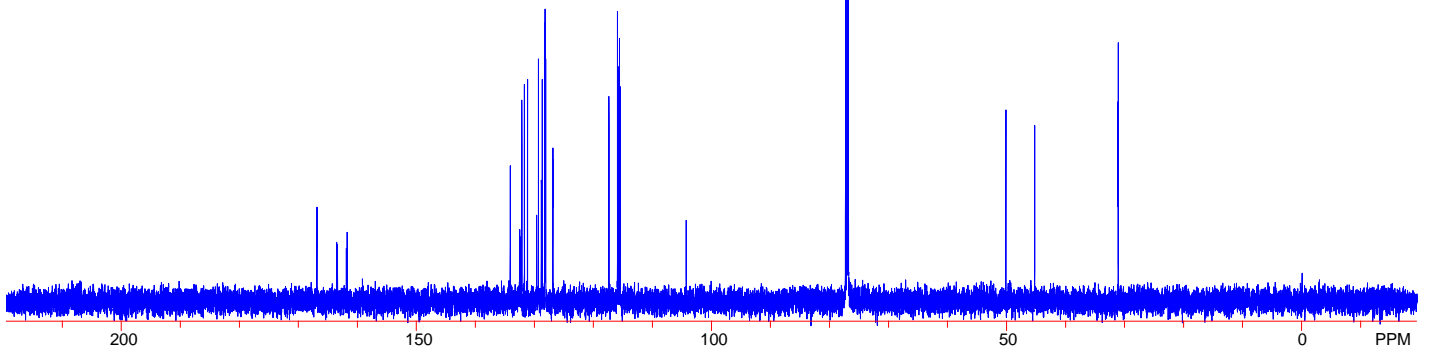

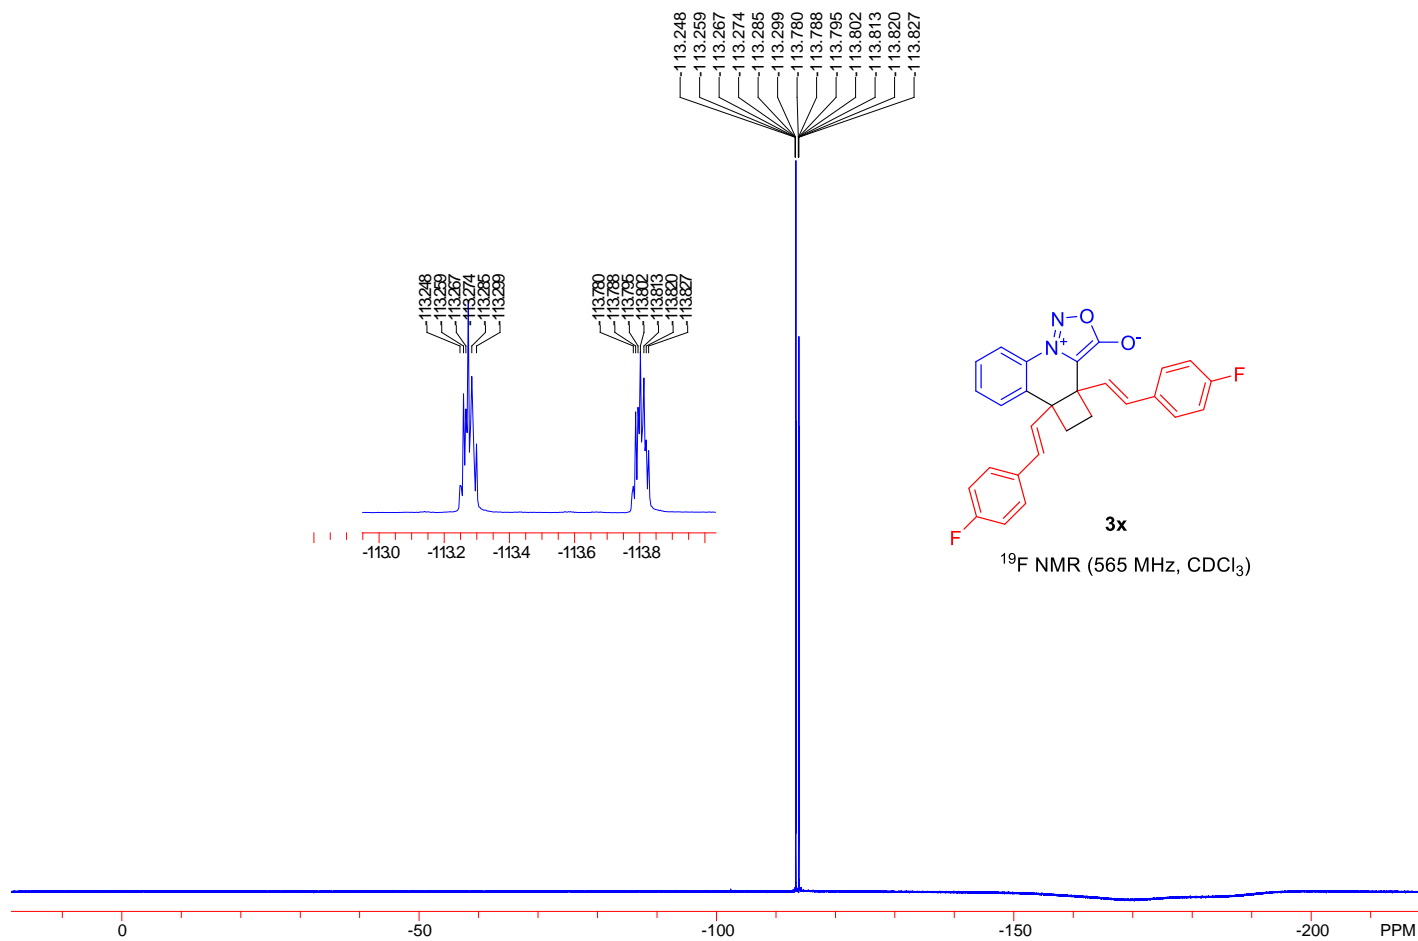

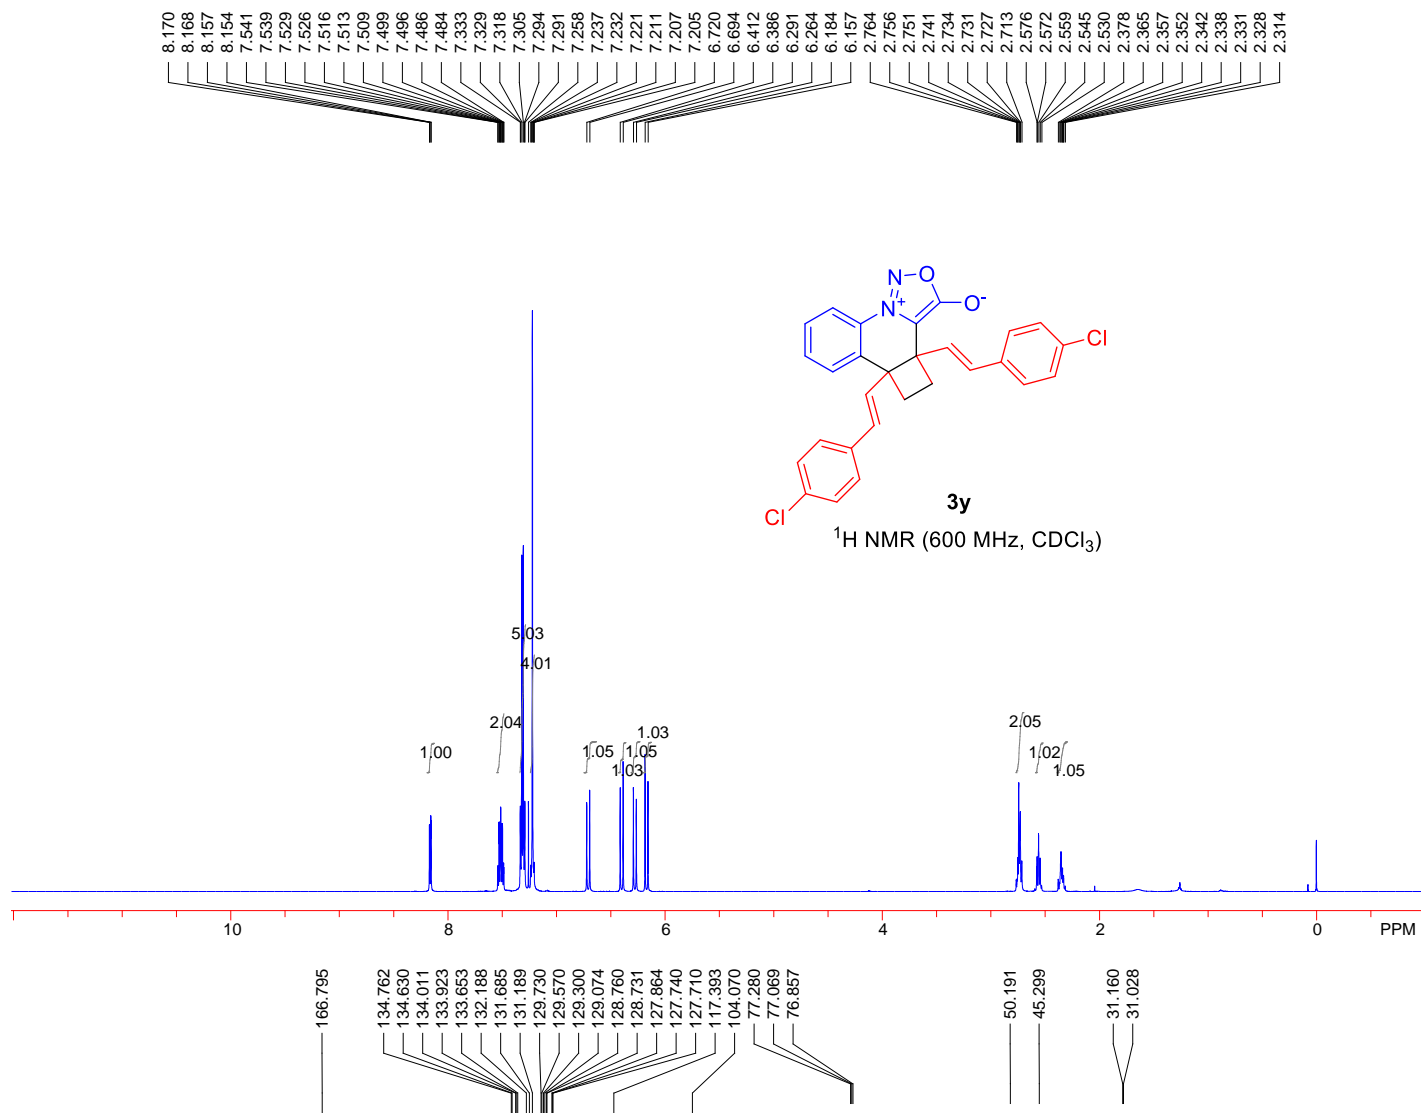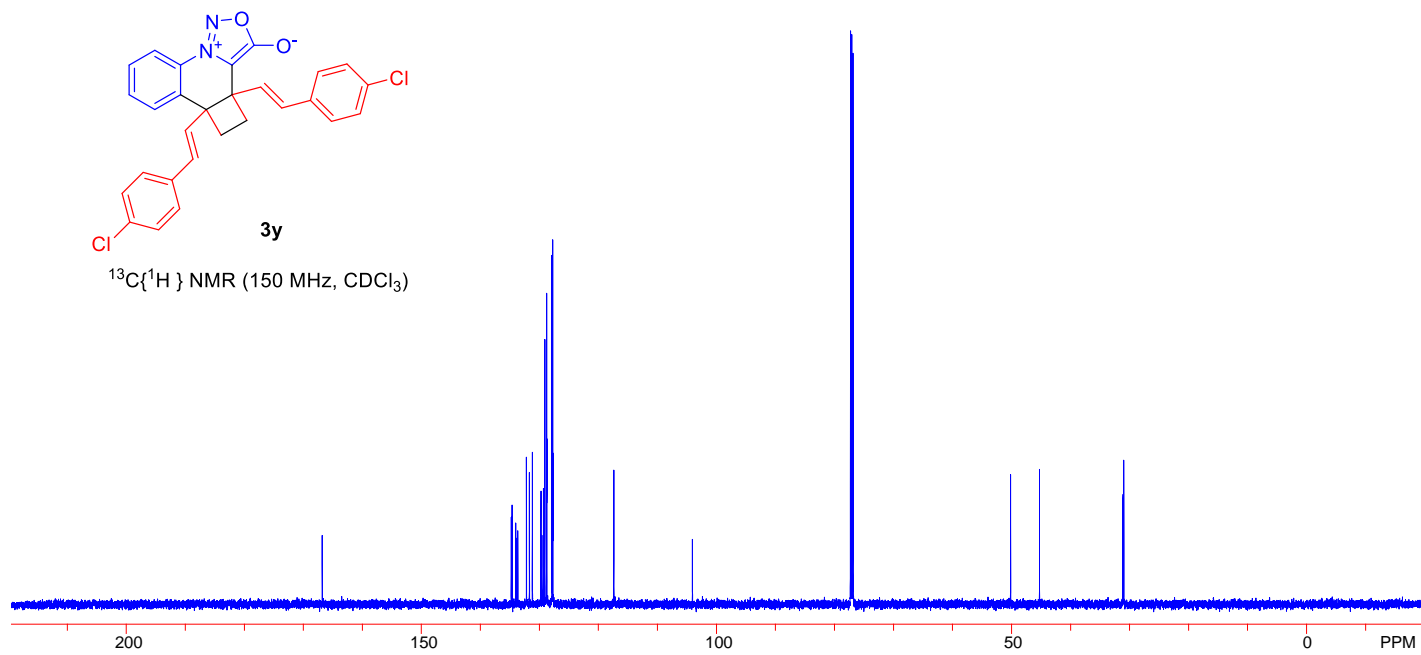

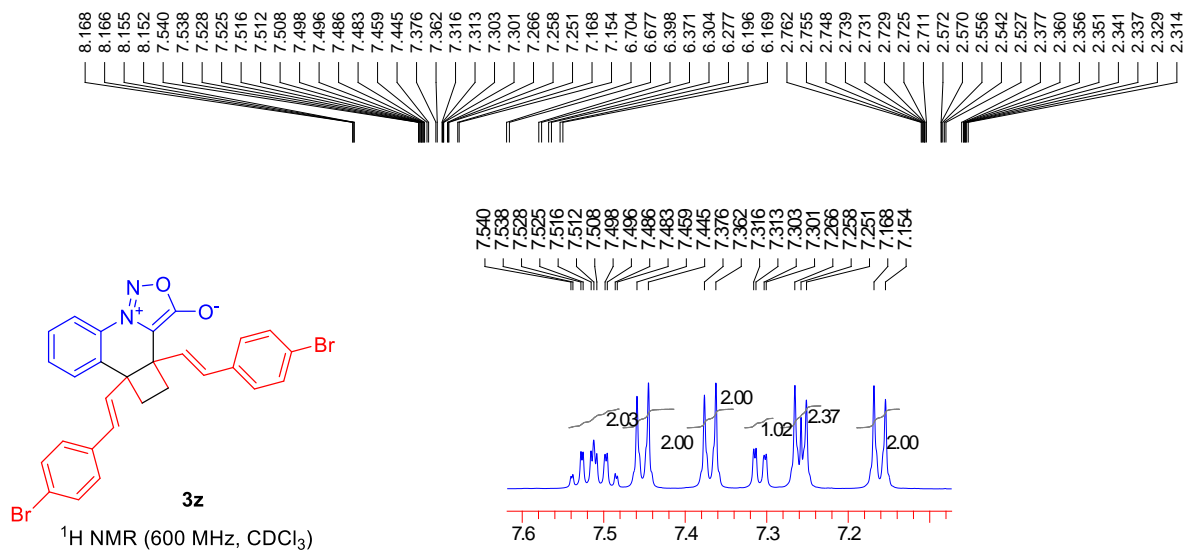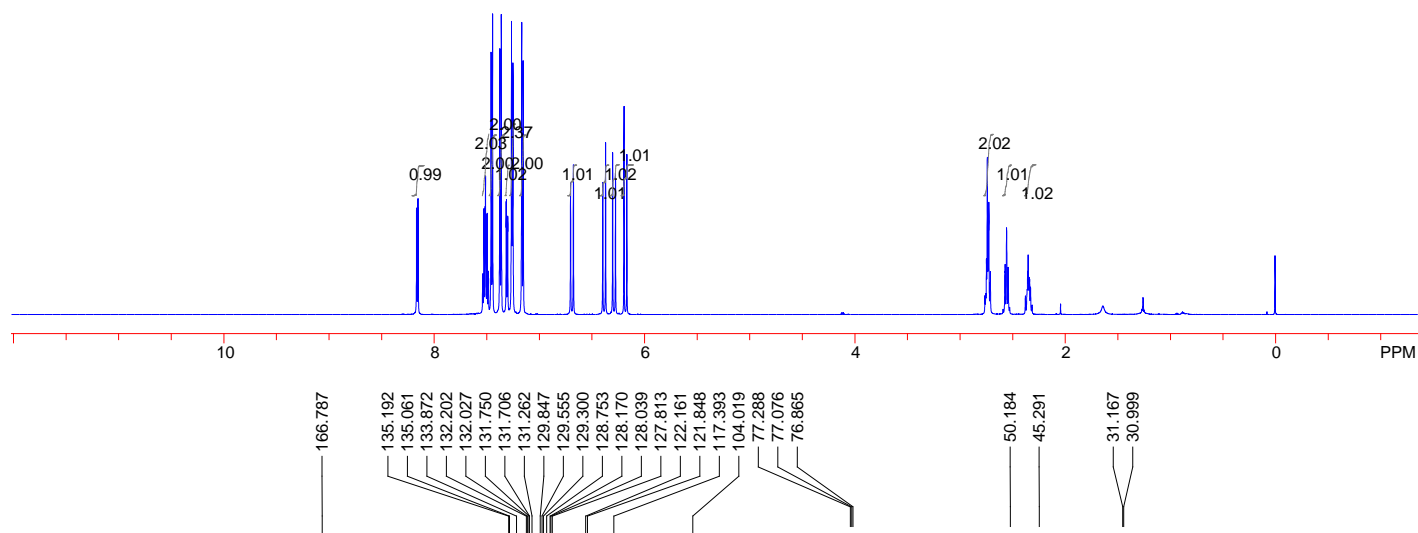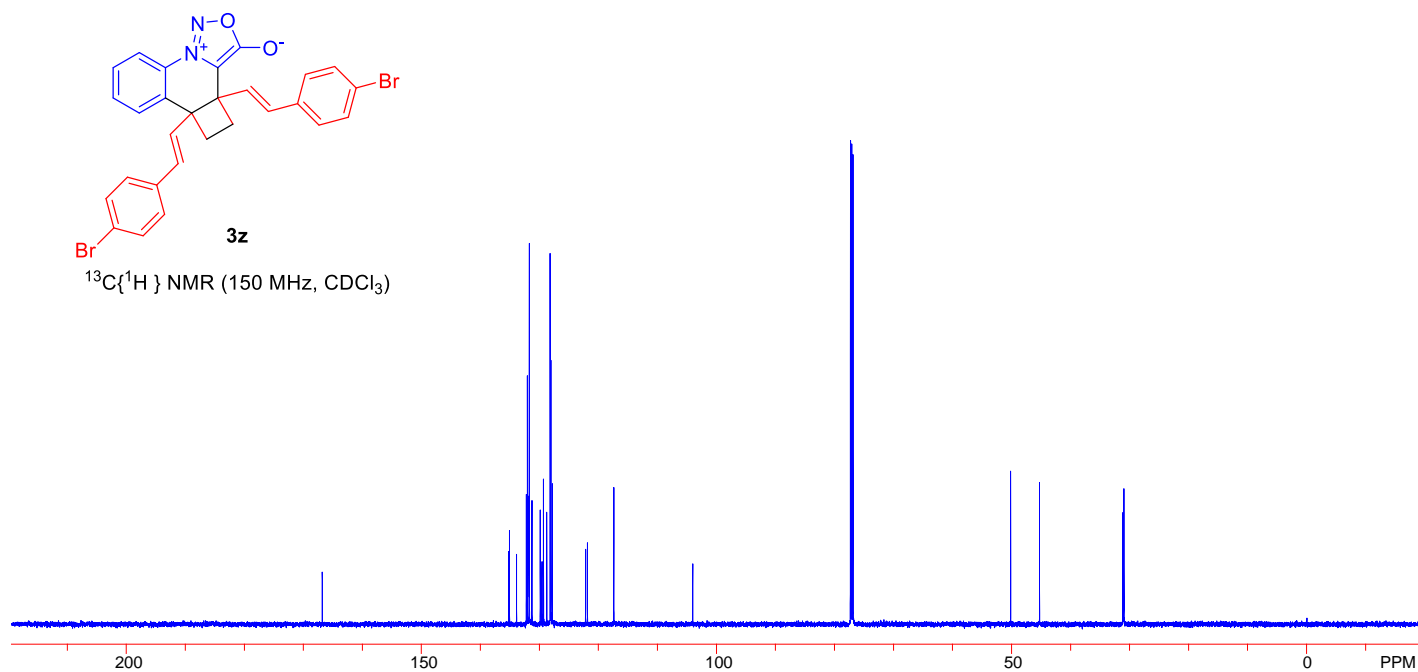

8.196  
8.194  
8.192  
8.183  
8.180  
8.180  
7.598  
7.584  
7.564  
7.561  
7.552  
7.549  
7.539  
7.536  
7.525  
7.522  
7.519  
7.513  
7.505  
7.491  
7.413  
7.400  
7.329  
7.326  
7.318  
7.316  
7.314  
7.259  
6.813  
6.786  
6.536  
6.509  
6.432  
6.405  
6.318  
6.291  
2.811  
2.805  
2.797  
2.790  
2.784  
2.781  
2.770  
2.766  
2.752  
2.624  
2.610  
2.607  
2.602  
2.598  
2.596  
2.584  
2.578  
2.419  
2.412  
2.407  
2.402  
2.390  
2.368

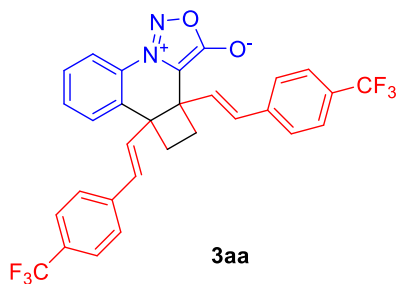

$^1\text{H NMR}$  (600 MHz,  $\text{CDCl}_3$ )

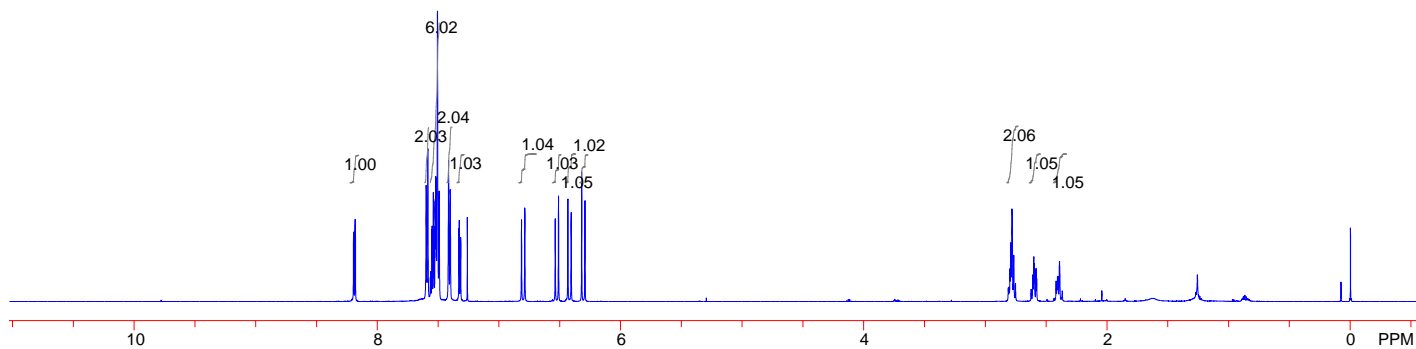

139.618  
139.458  
166.714  
133.617  
132.297  
131.743  
131.677  
131.240  
130.277  
130.058  
129.920  
129.708  
129.548  
129.424  
129.256  
128.899  
126.814  
126.726  
125.924  
125.902  
125.873  
125.851  
125.618  
125.596  
125.574  
125.545  
124.991  
124.925  
123.190  
123.124  
117.473  
103.677  
77.258  
77.047  
76.828  
50.242  
45.364  
31.247  
30.904

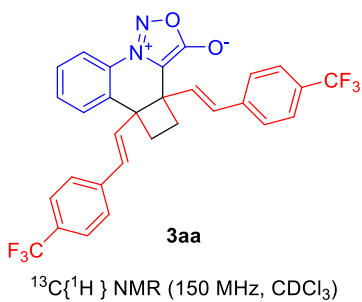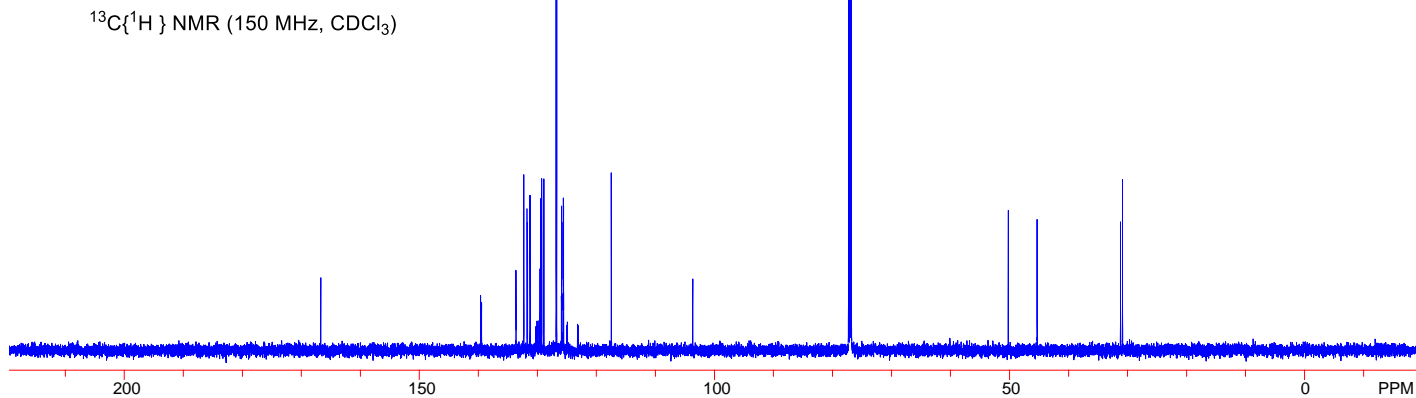

-62.559  
-62.603

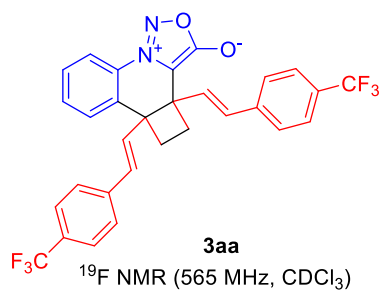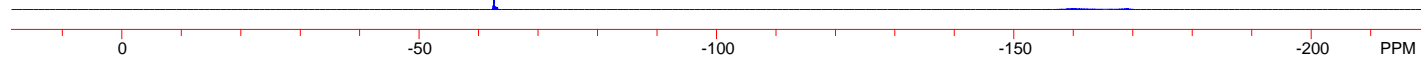

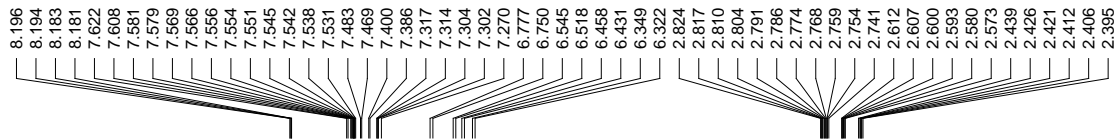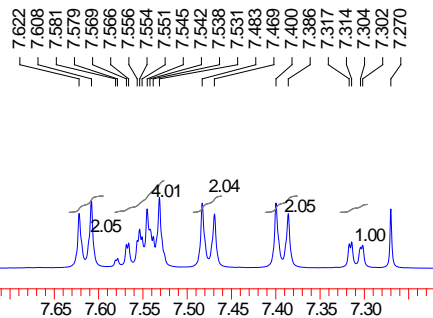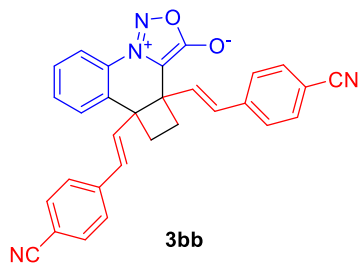

<sup>1</sup>H NMR (600 MHz, CDCl<sub>3</sub>)

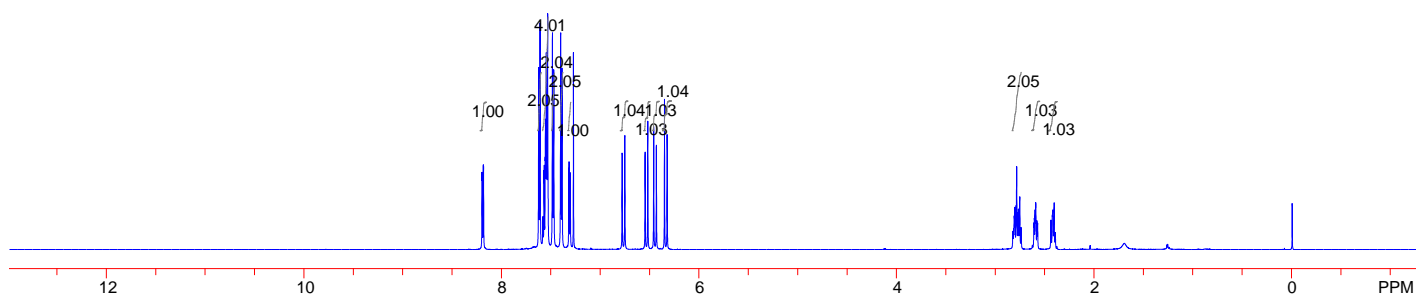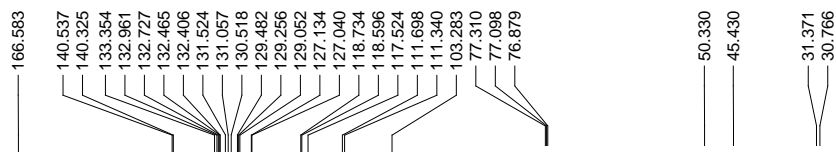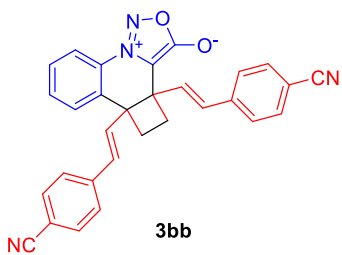

<sup>13</sup>C{<sup>1</sup>H} NMR (150 MHz, CDCl<sub>3</sub>)

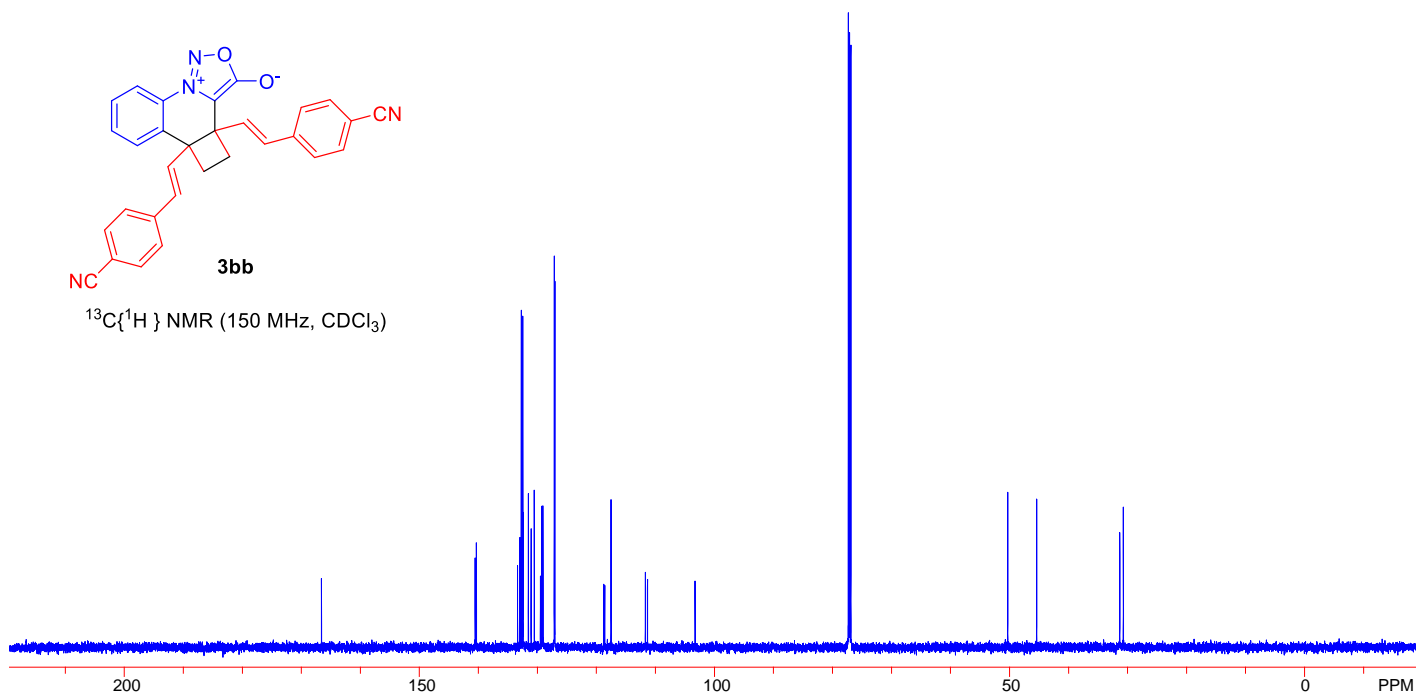



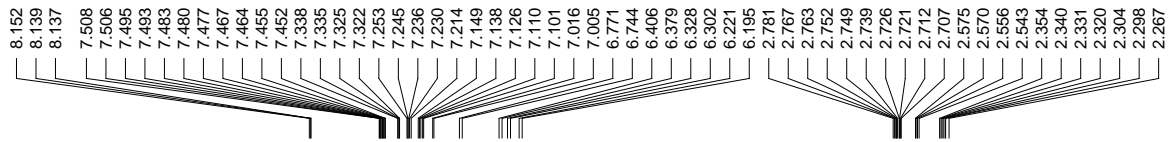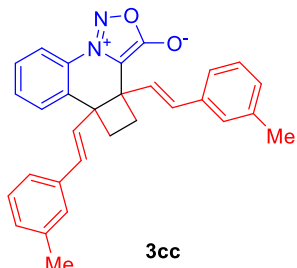

$^1\text{H}$  NMR (600 MHz,  $\text{CDCl}_3$ )

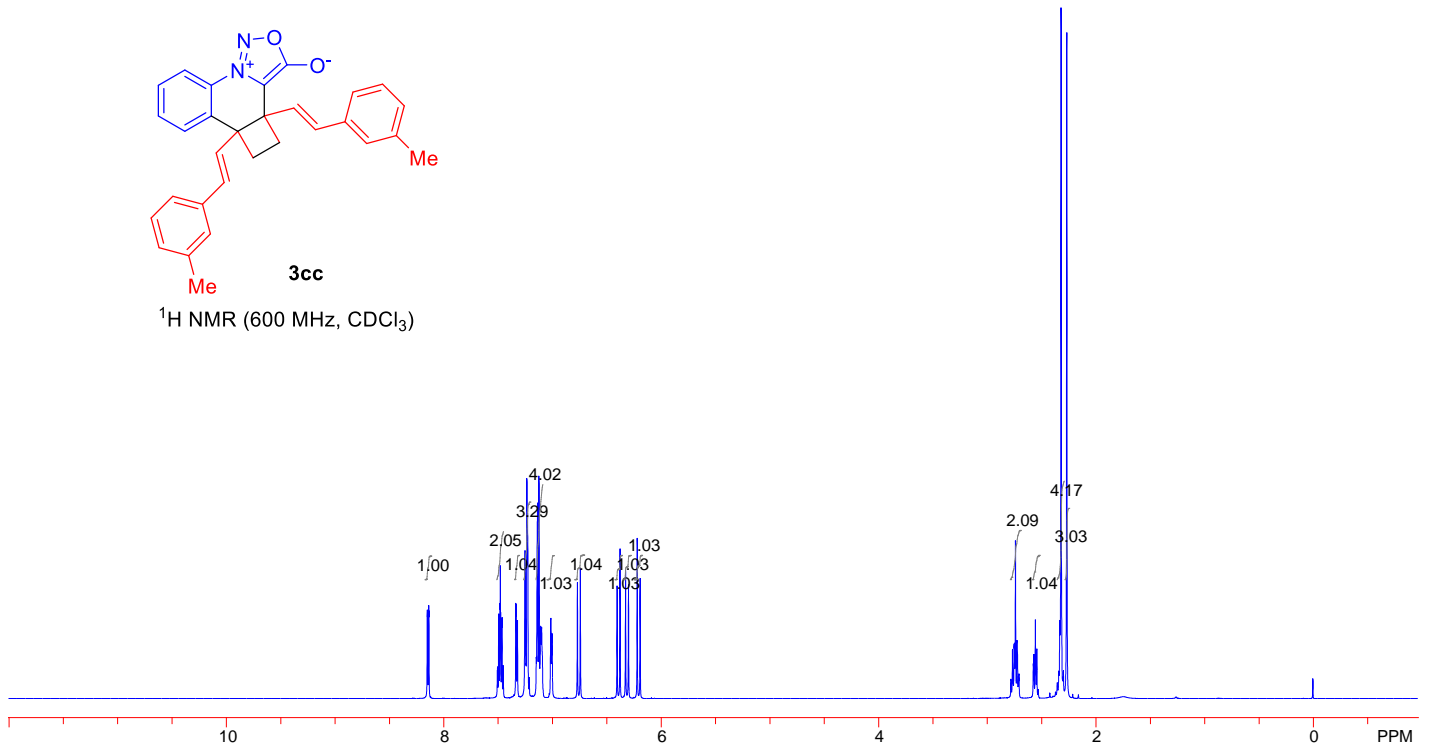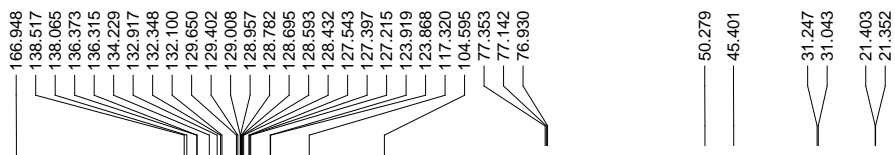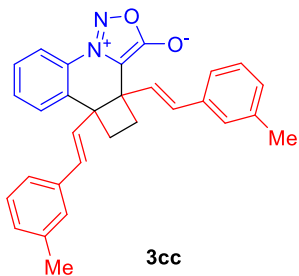

$^{13}\text{C}\{^1\text{H}\}$  NMR (150 MHz,  $\text{CDCl}_3$ )

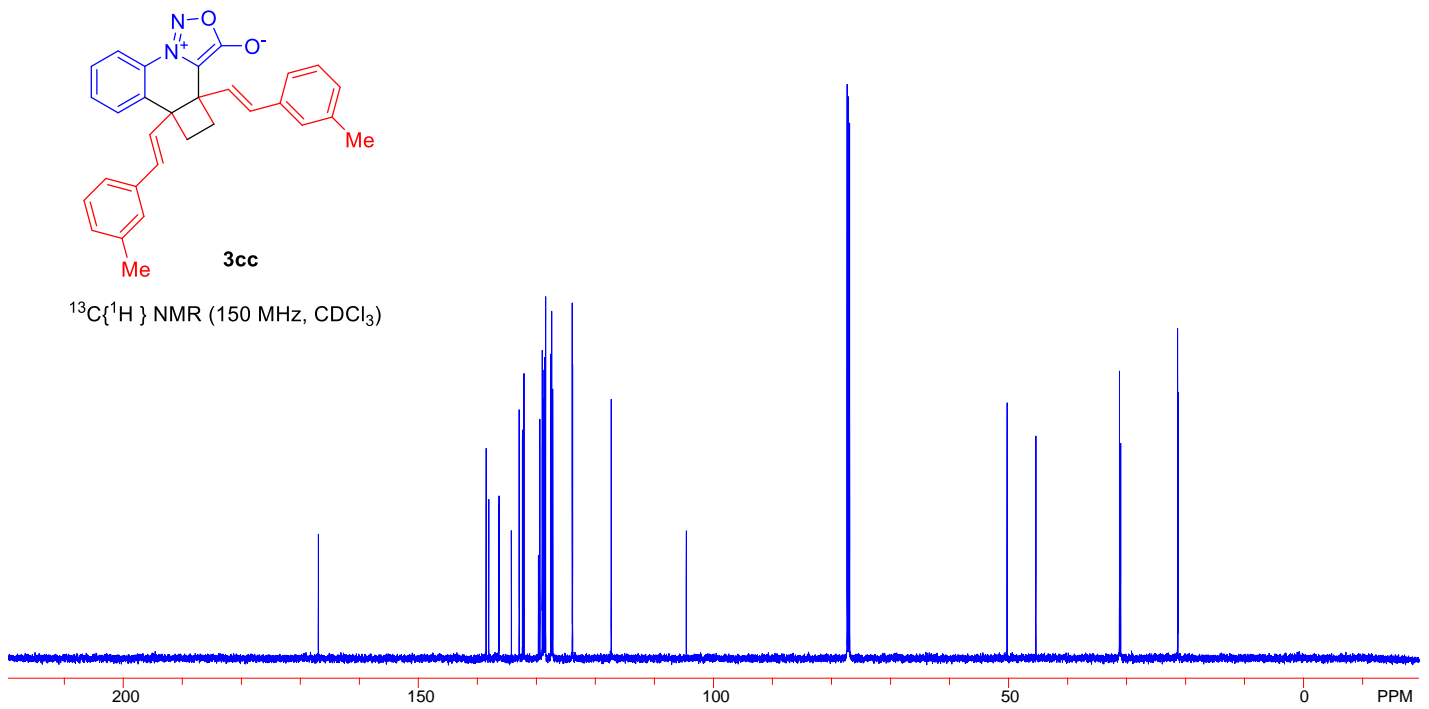

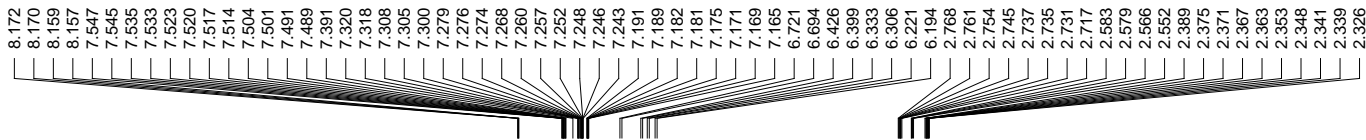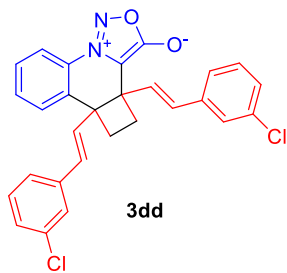

$^1\text{H NMR}$  (600 MHz,  $\text{CDCl}_3$ )

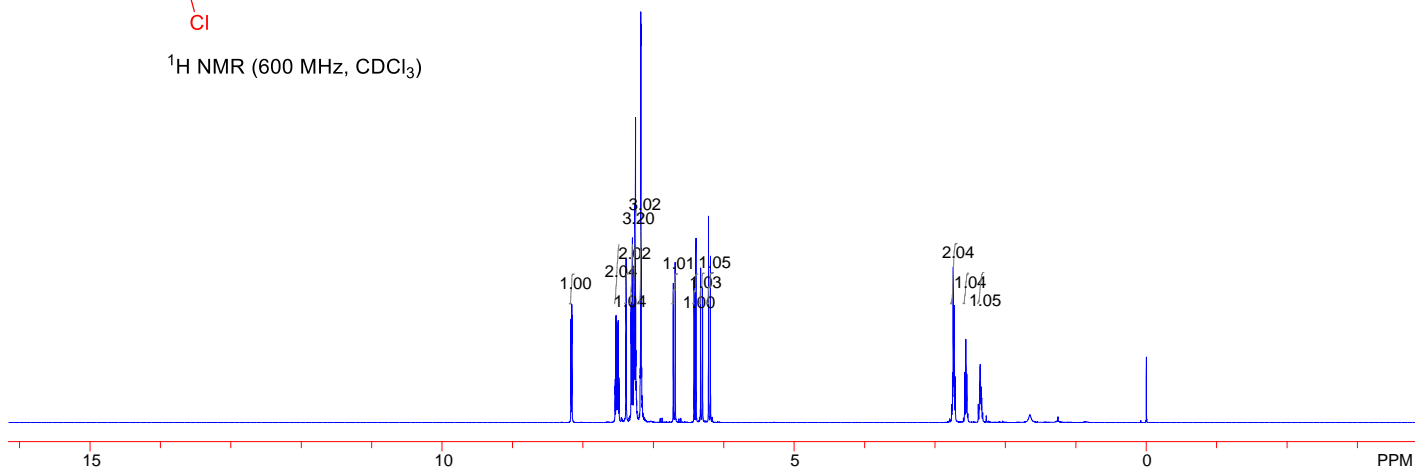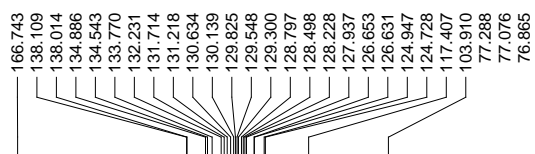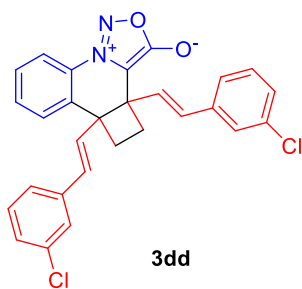

$^{13}\text{C}\{^1\text{H}\}$  NMR (150 MHz,  $\text{CDCl}_3$ )

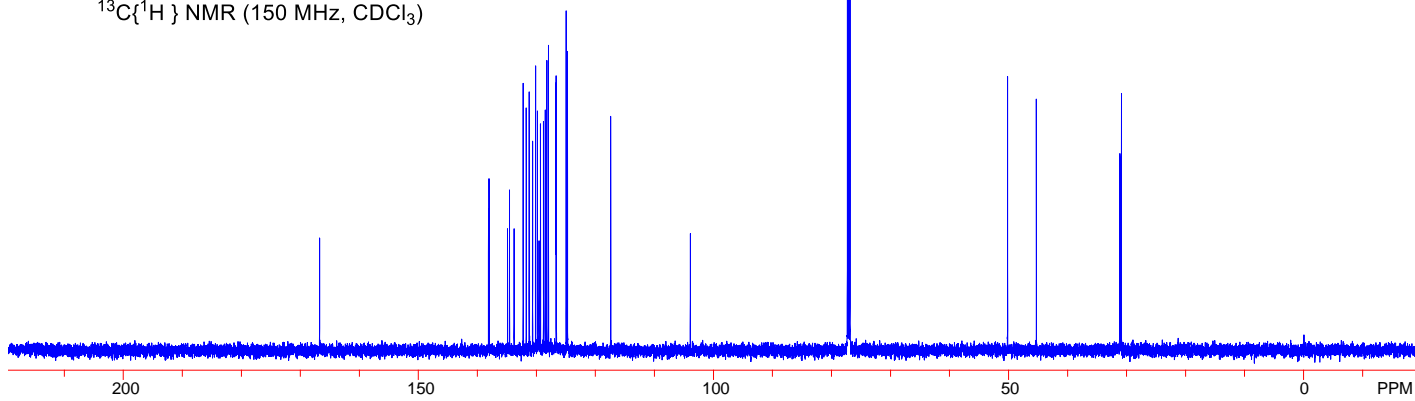

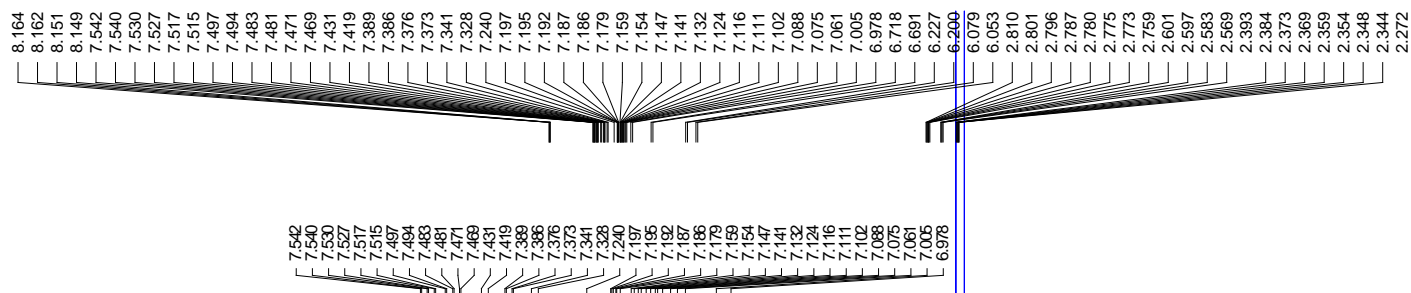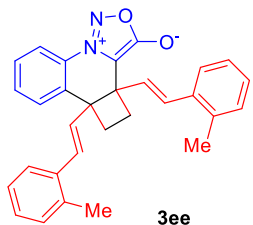

$^1\text{H NMR}$  (600 MHz,  $\text{CDCl}_3$ )

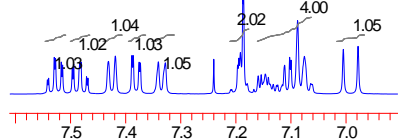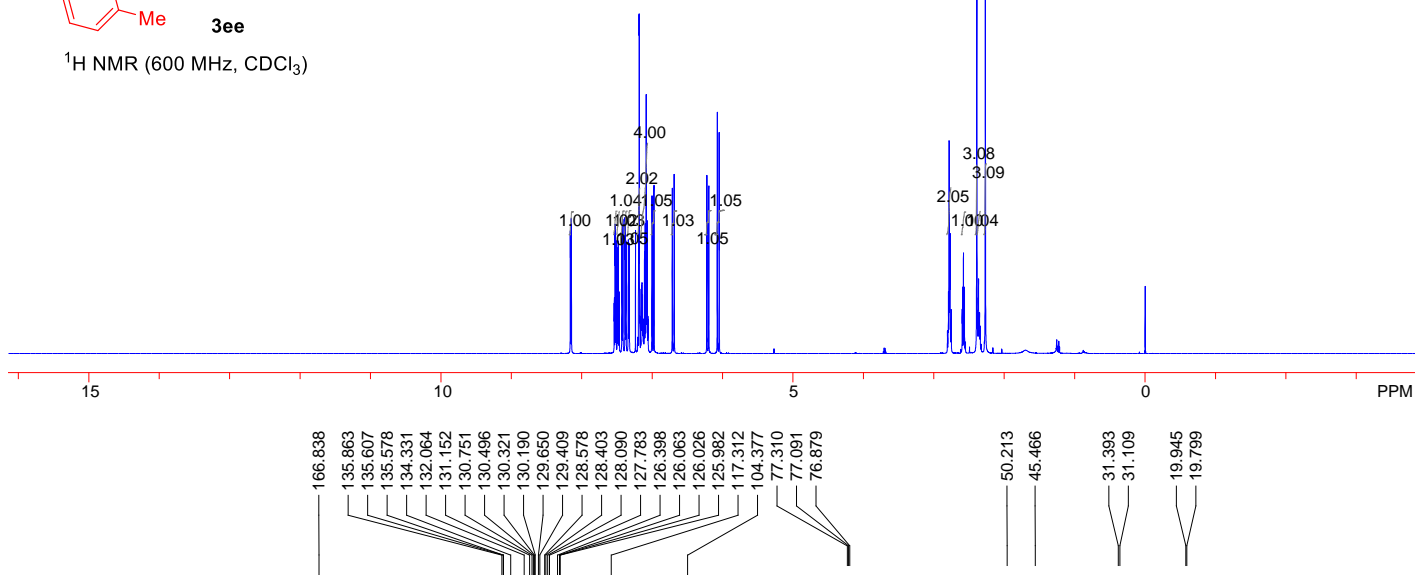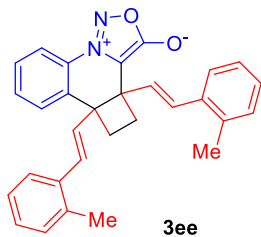

$^{13}\text{C}\{^1\text{H}\}$  NMR (150 MHz,  $\text{CDCl}_3$ )

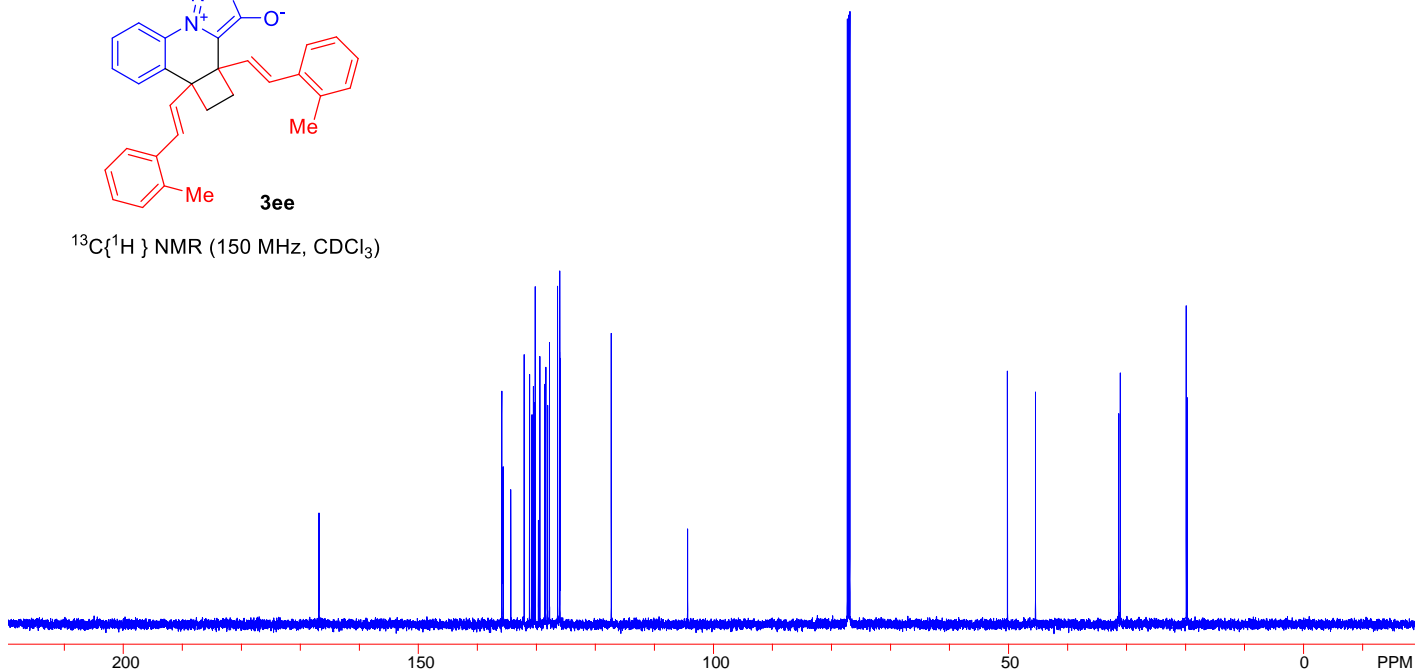

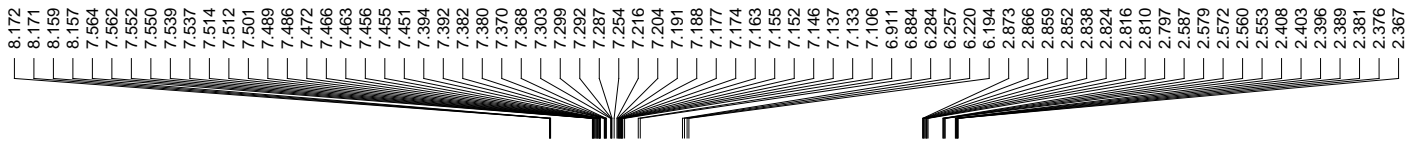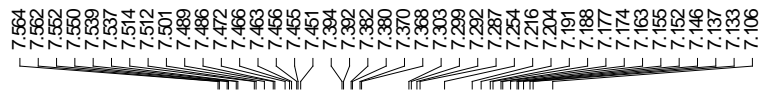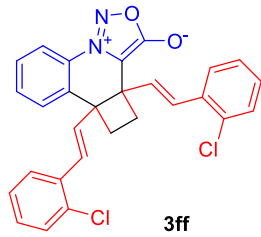

$^1\text{H}$  NMR (600 MHz,  $\text{CDCl}_3$ )

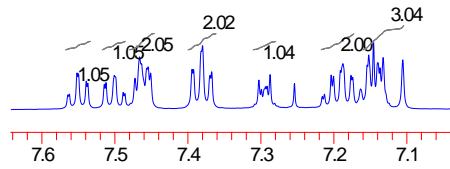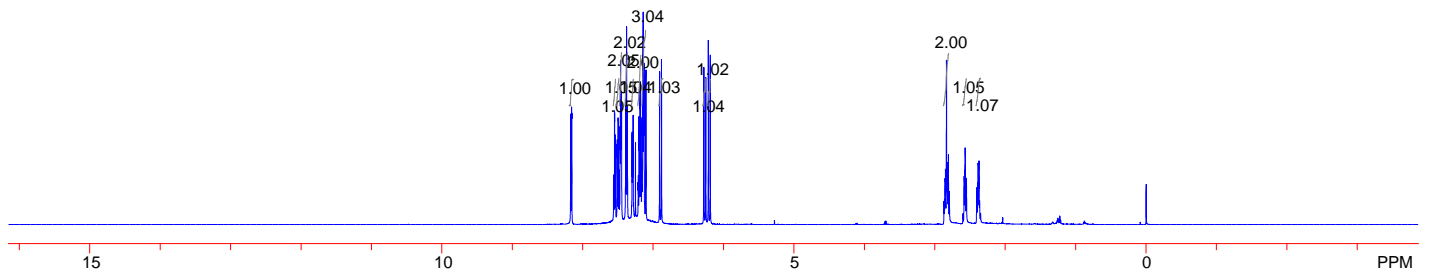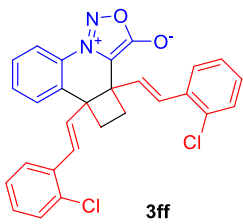

$^{13}\text{C}\{^1\text{H}\}$  NMR (150 MHz,  $\text{CDCl}_3$ )

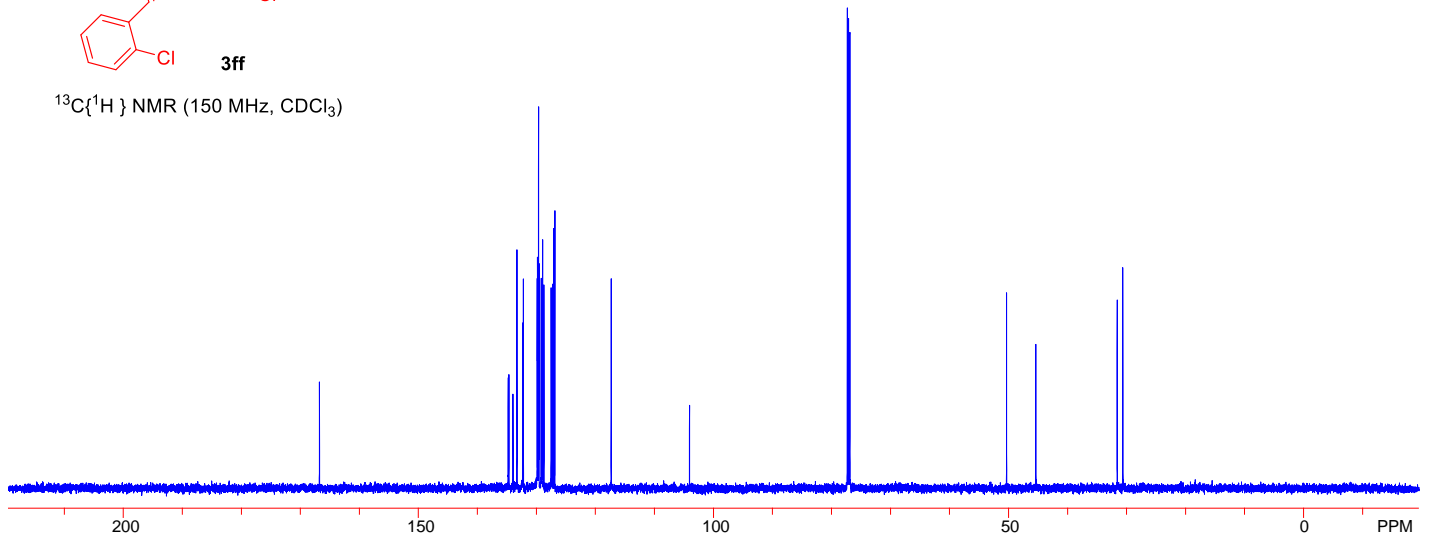

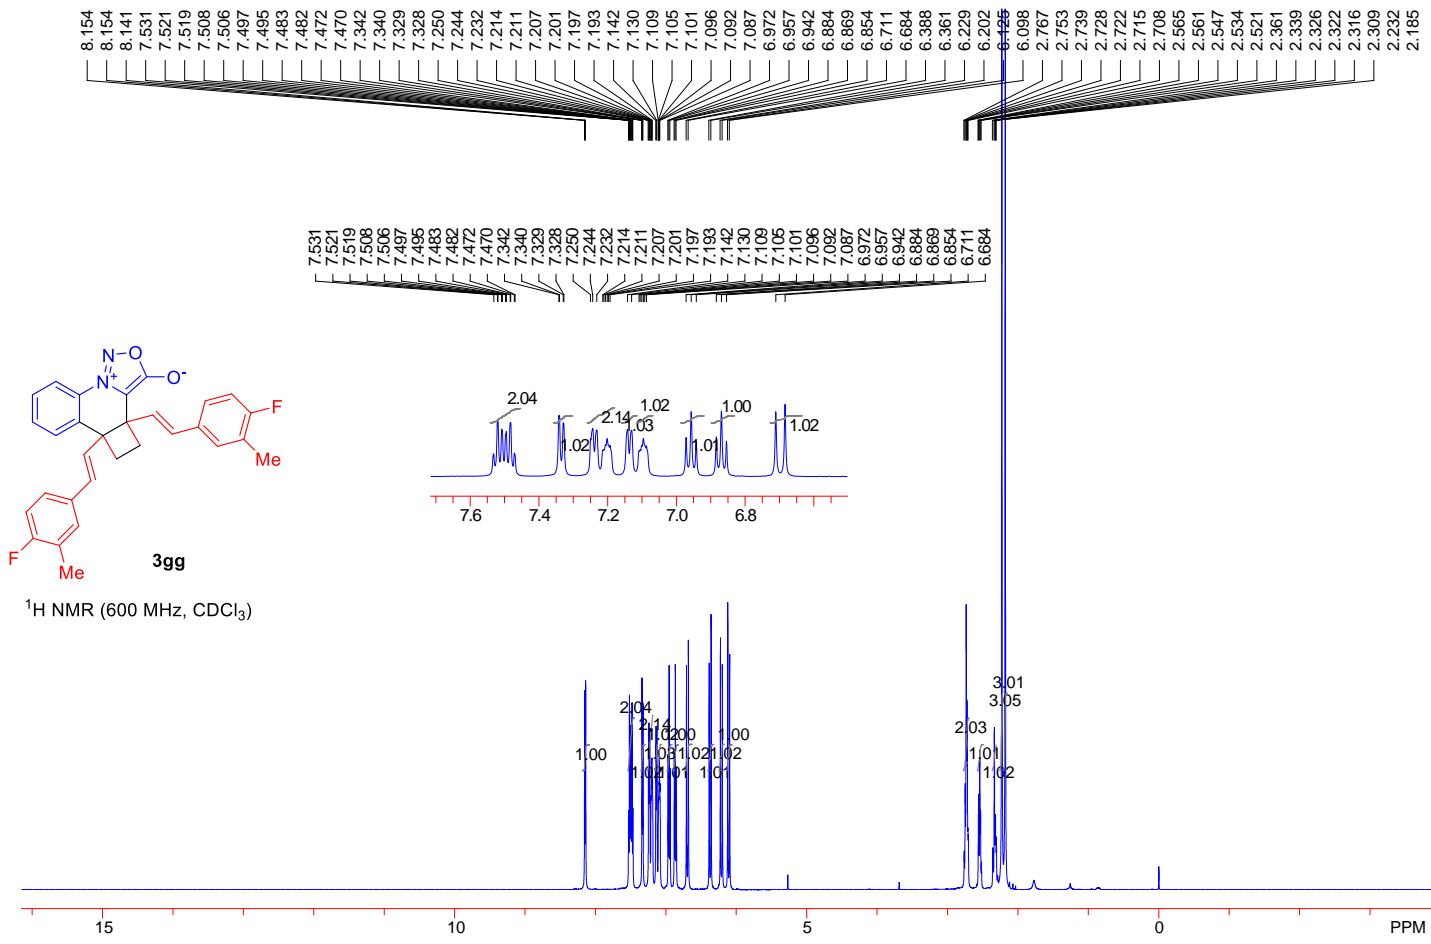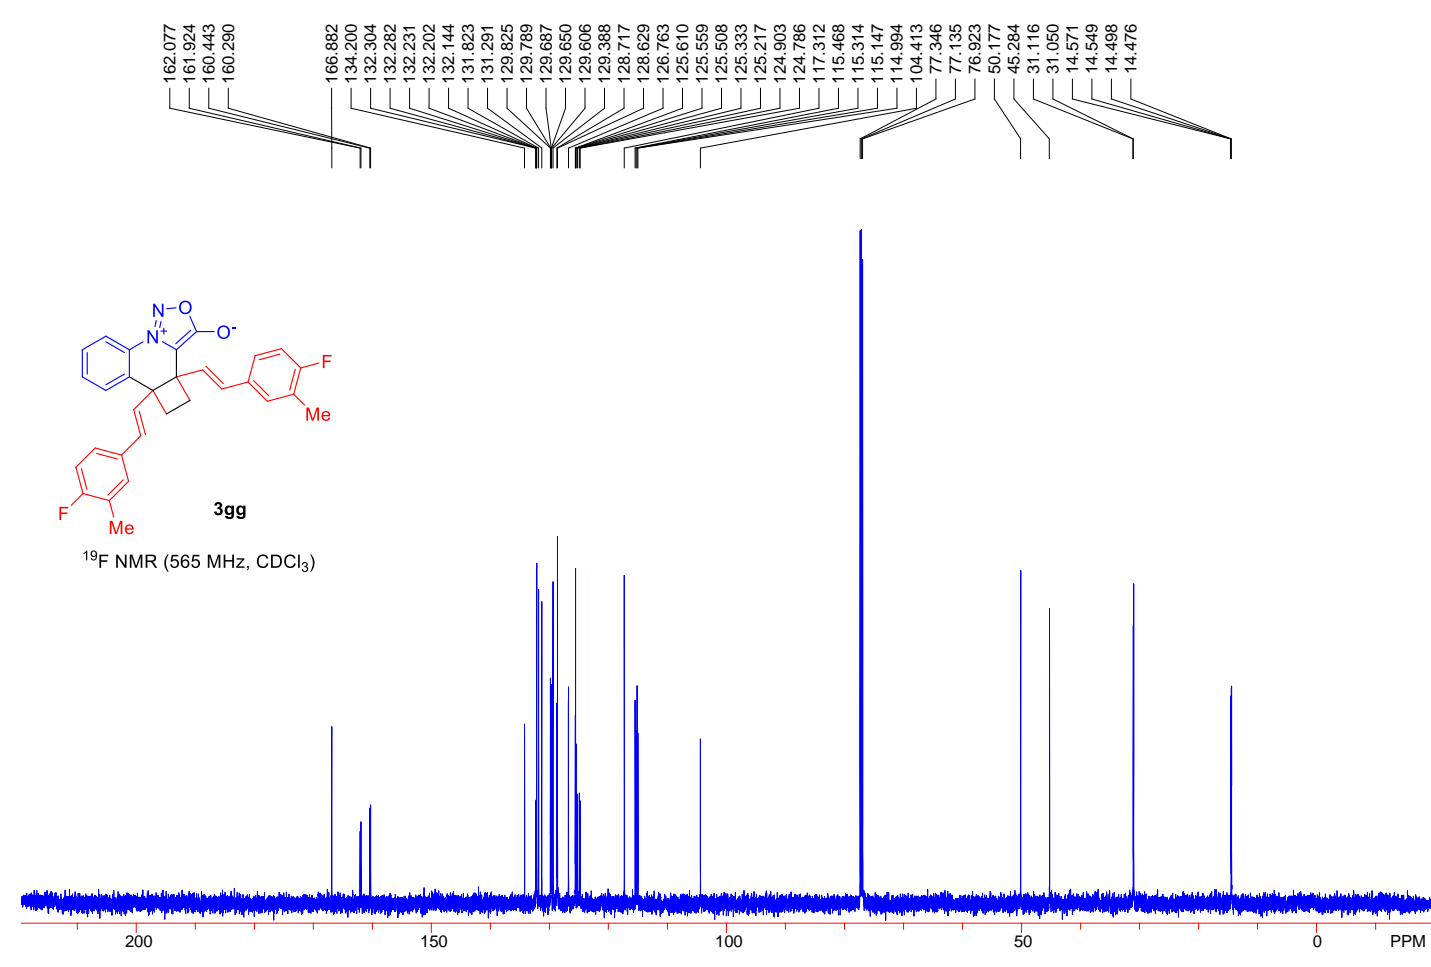

117.586  
117.597  
118.122  
118.140  
118.158

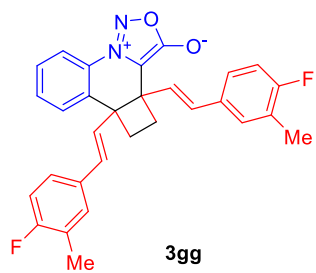

$^{19}\text{F}$  NMR (565 MHz,  $\text{CDCl}_3$ )

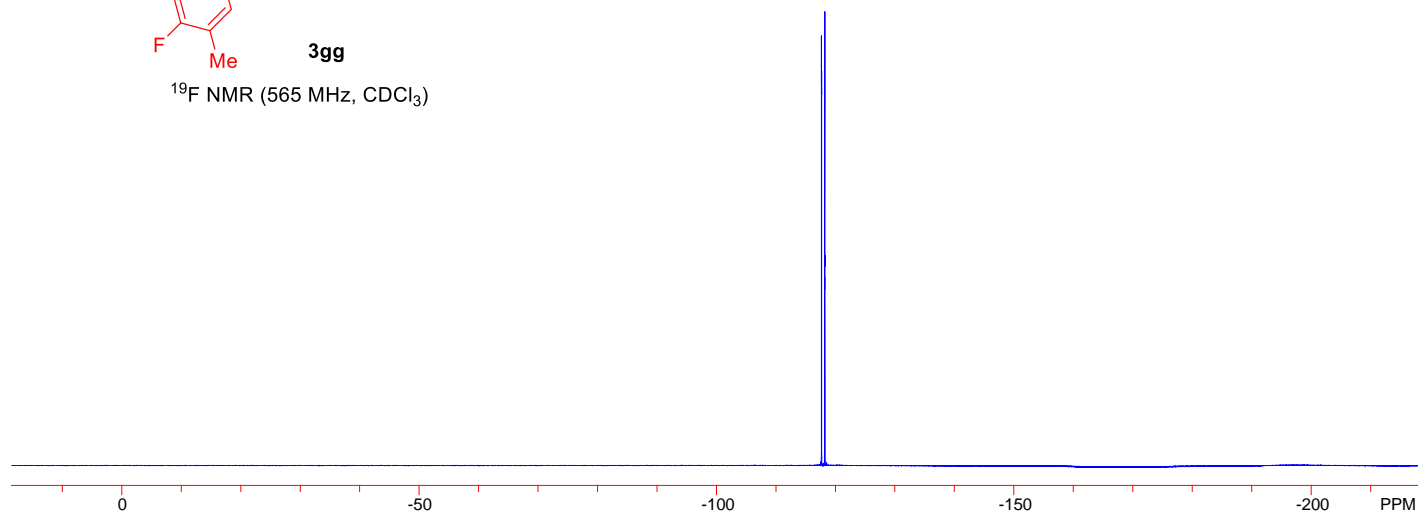

8.157  
8.145  
8.144  
7.665  
7.665  
7.654  
7.653  
7.642  
7.640  
7.618  
7.616  
7.604  
7.597  
7.592  
7.590  
7.577  
7.539  
7.536  
7.526  
7.523  
7.519  
7.516  
7.506  
7.503  
7.503  
7.404  
7.390  
7.372  
7.357  
7.344  
7.334  
7.331  
7.317  
7.249  
6.877  
6.850  
6.840  
6.521  
6.514  
6.494  
6.455  
6.428  
3.380  
2.762  
2.751  
2.737  
2.734  
2.711  
2.701  
2.696  
2.686  
2.513  
2.510  
2.415  
2.389  
2.378

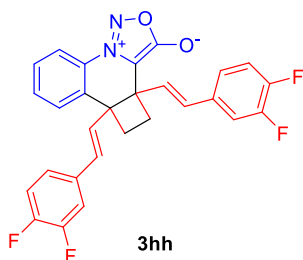

$^1\text{H}$  NMR (600 MHz,  $\text{DMSO-}d_6$ )

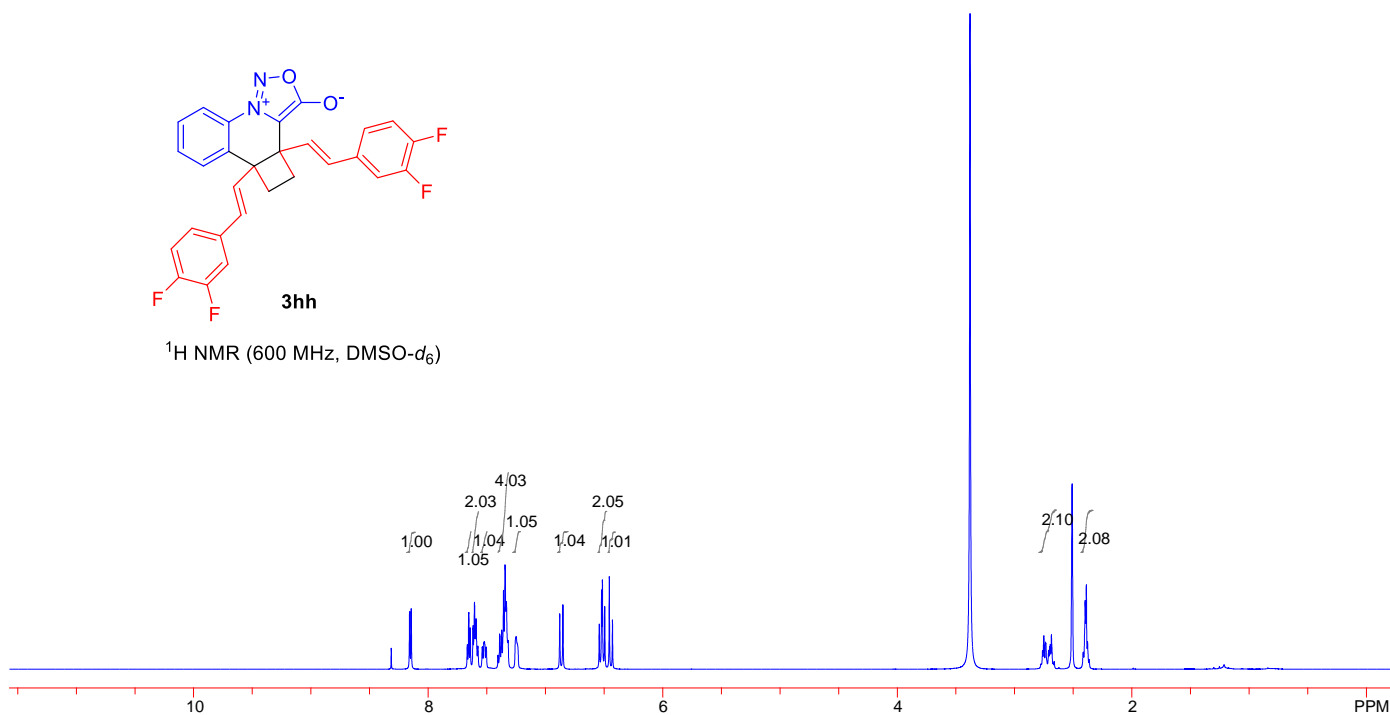

166.335  
150.964  
150.884  
150.818  
150.162  
150.082  
149.345  
149.280  
149.192  
148.536  
148.448  
134.922  
134.331  
132.851  
131.546  
129.869  
129.781  
129.716  
129.694  
129.512  
129.227  
124.006  
123.984  
118.173  
118.056  
117.939  
117.400  
115.453  
115.336  
115.307  
115.190  
104.406  
50.016  
40.508  
40.384  
45.014  
40.245  
39.968  
39.830  
39.691  
39.553  
30.846  
29.833

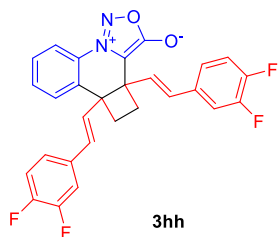

$^{13}\text{C}\{^1\text{H}\}$  NMR (150 MHz,  $\text{DMSO-}d_6$ )

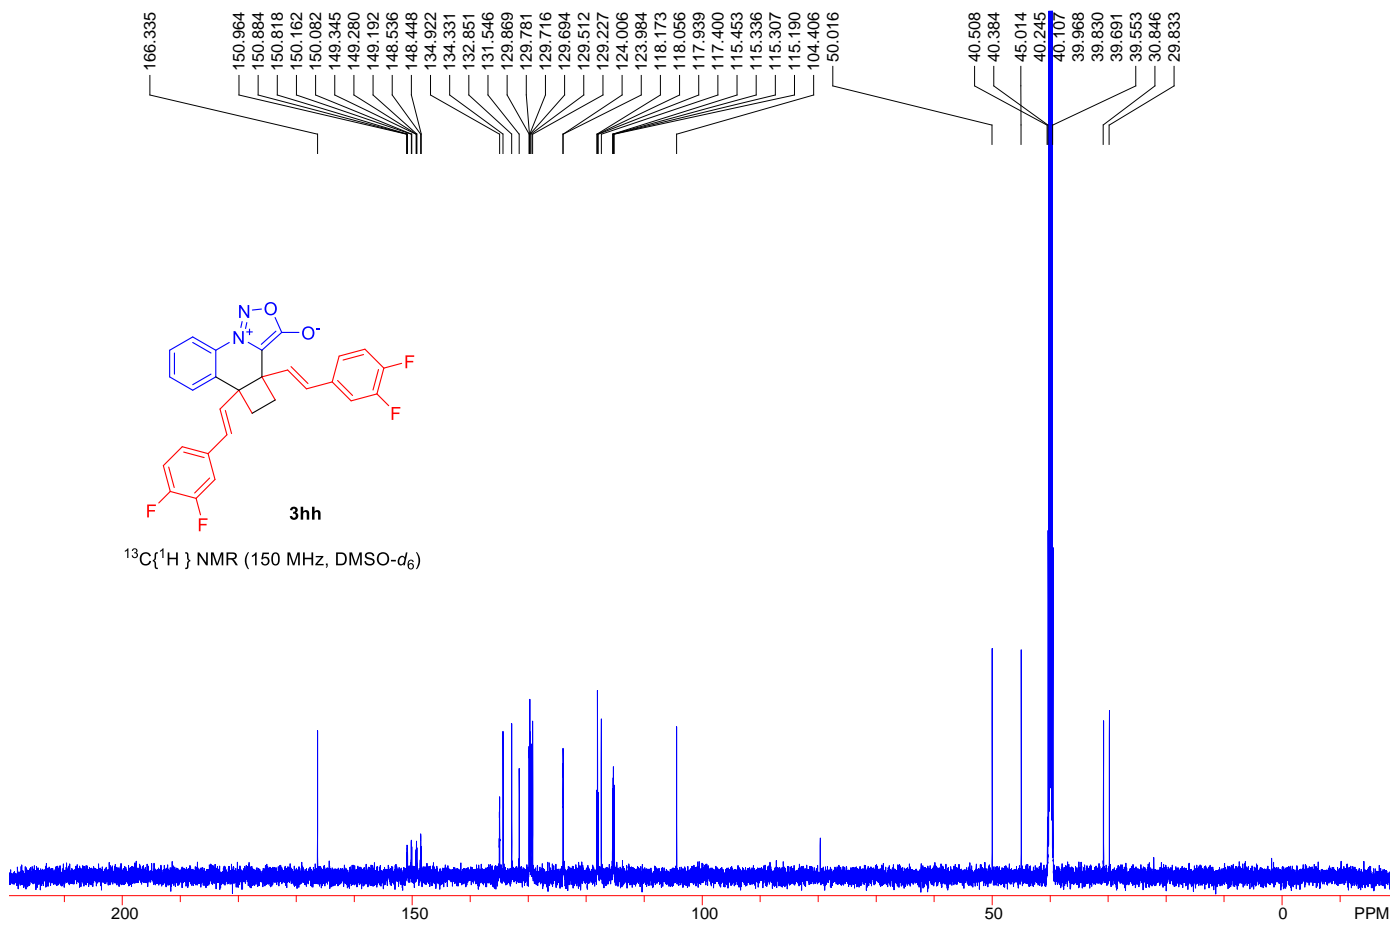

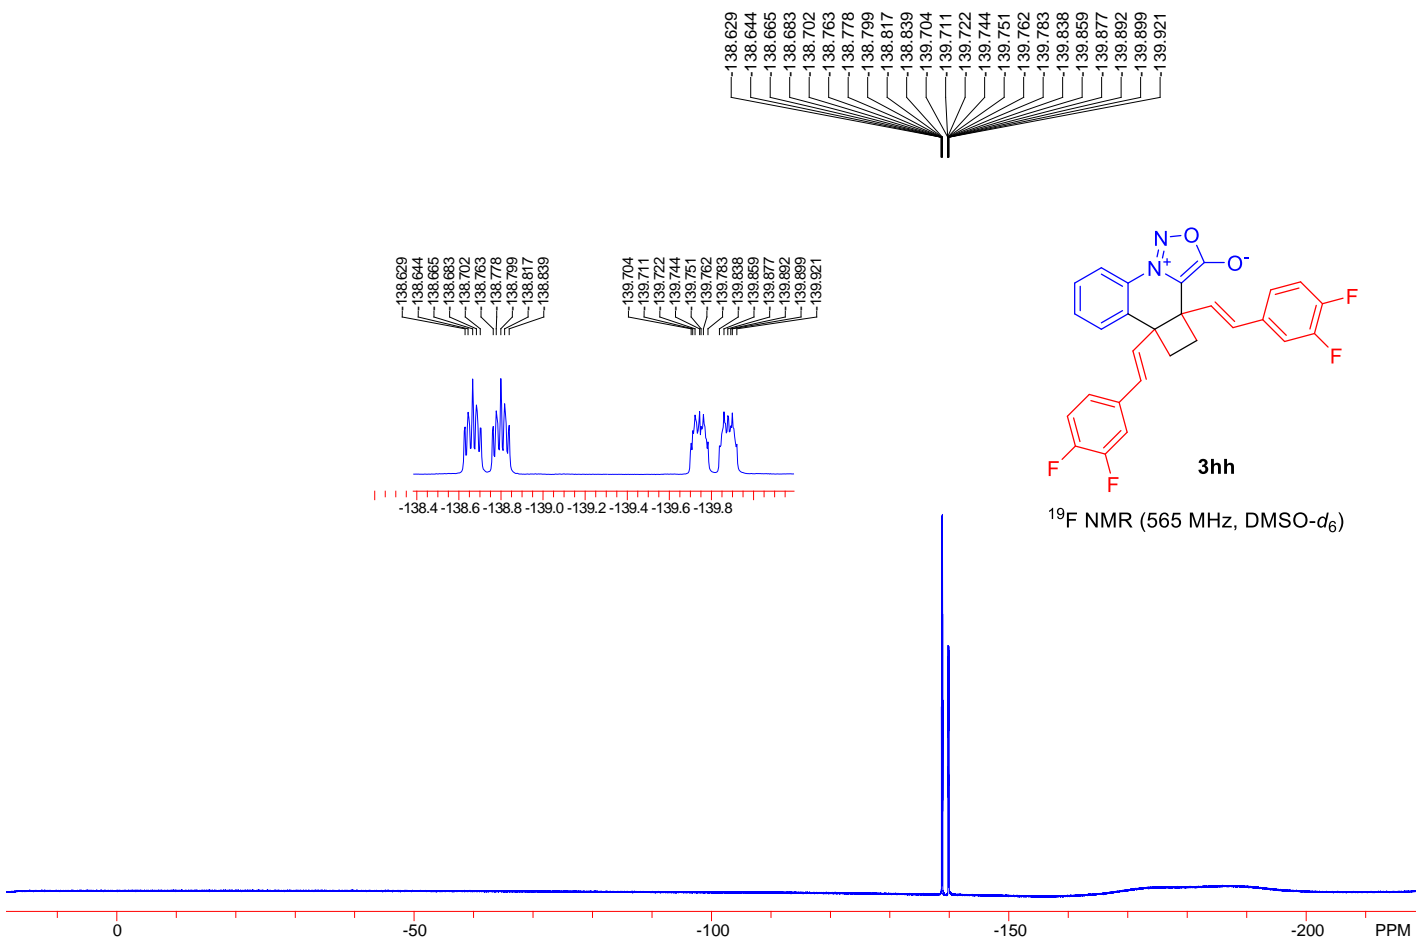



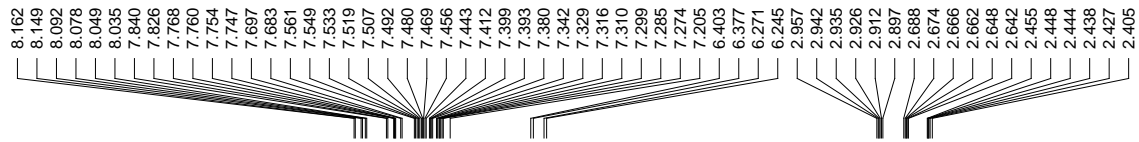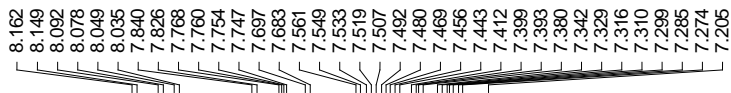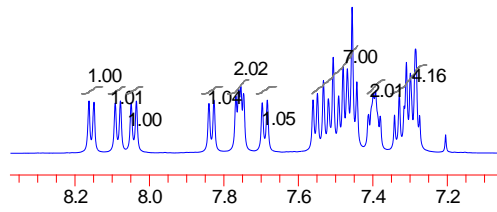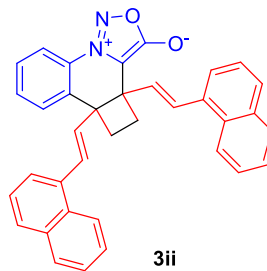

$^1\text{H}$  NMR (600 MHz,  $\text{CDCl}_3$ )

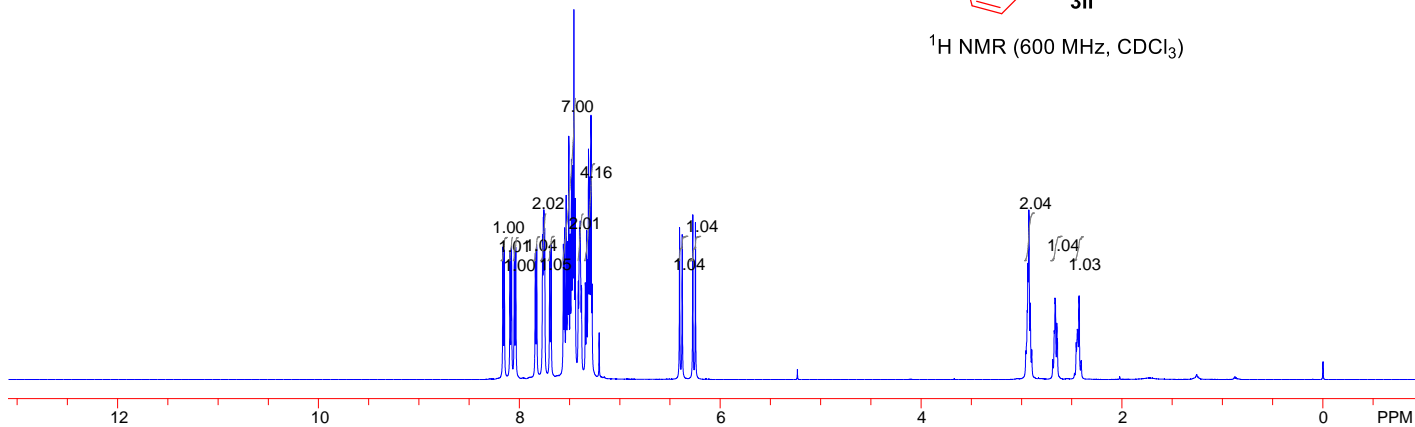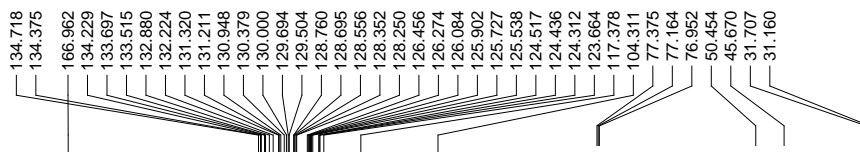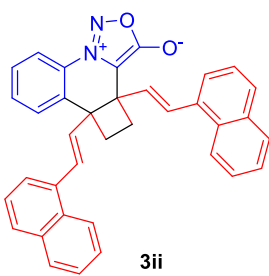

$^{13}\text{C}\{^1\text{H}\}$  NMR (150 MHz,  $\text{CDCl}_3$ )

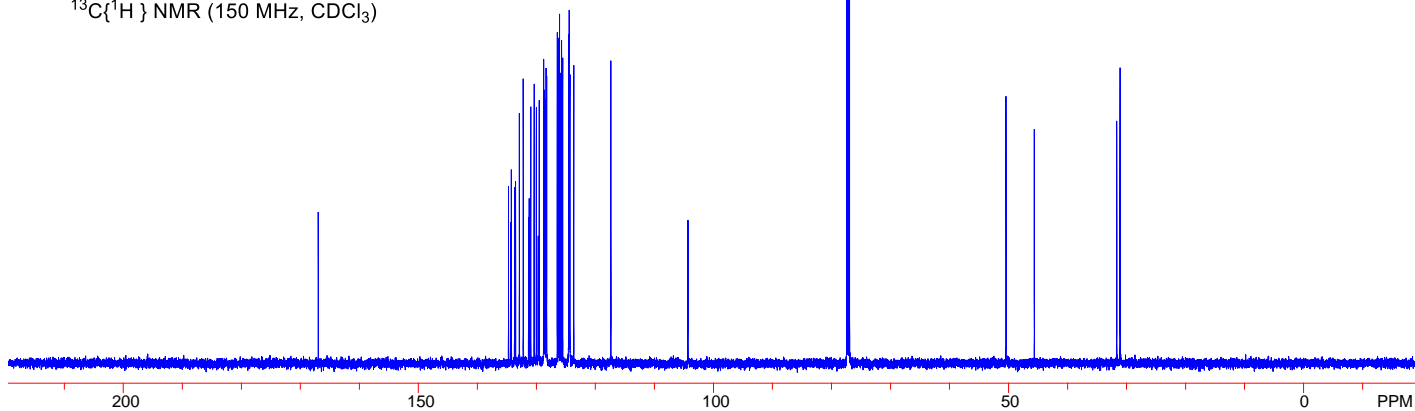

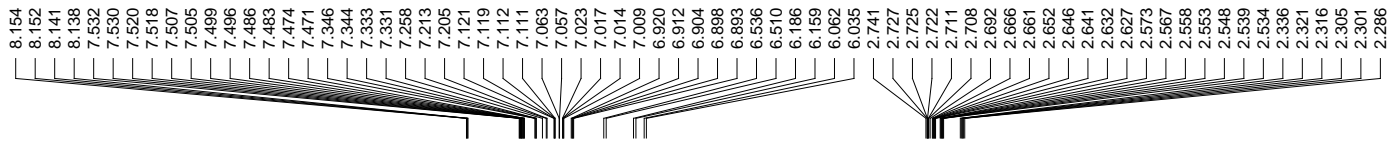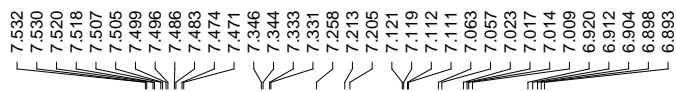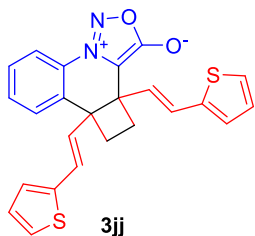

$^1\text{H}$  NMR (600 MHz,  $\text{CDCl}_3$ )

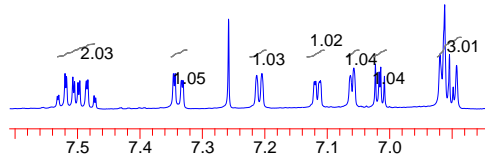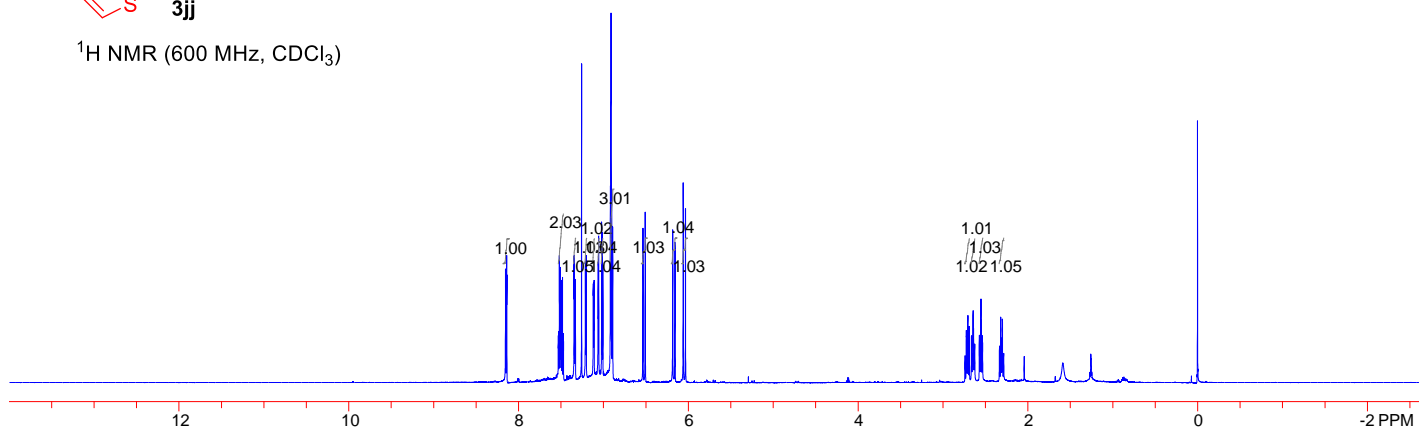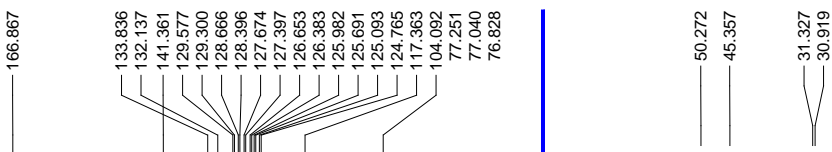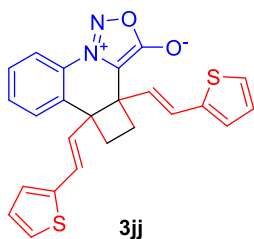

$^{13}\text{C}\{^1\text{H}\}$  NMR (150 MHz,  $\text{CDCl}_3$ )

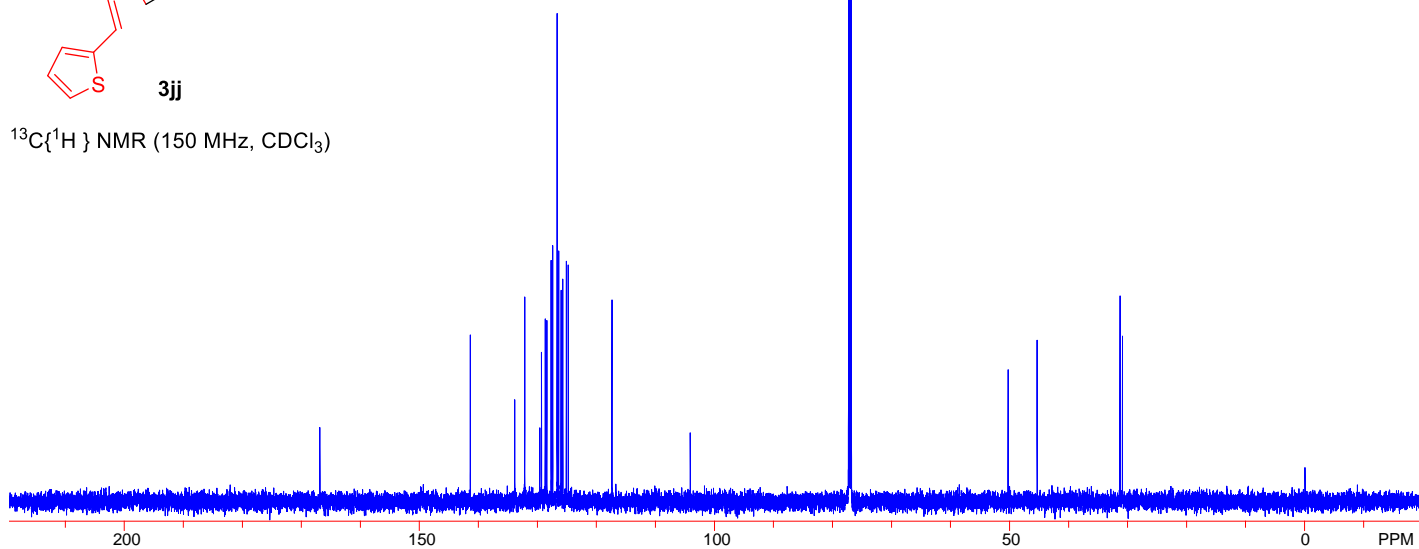

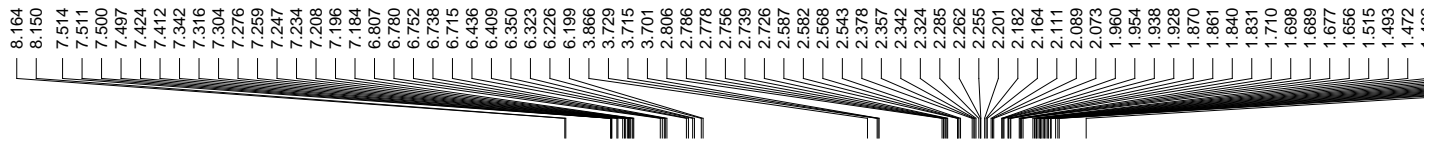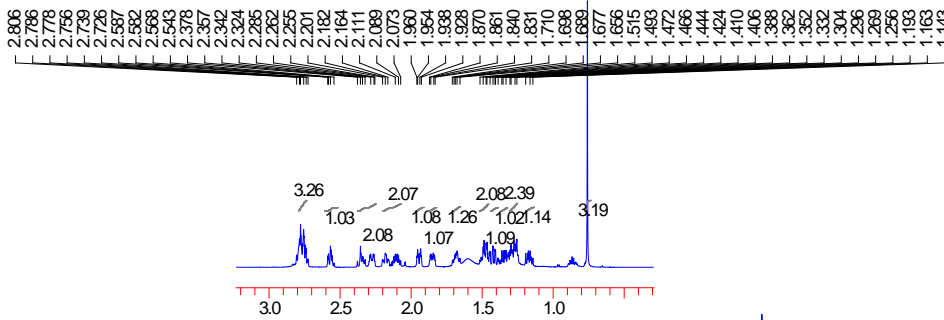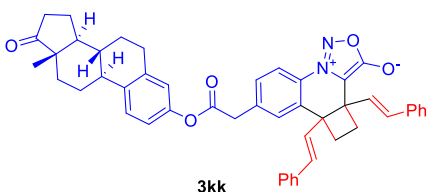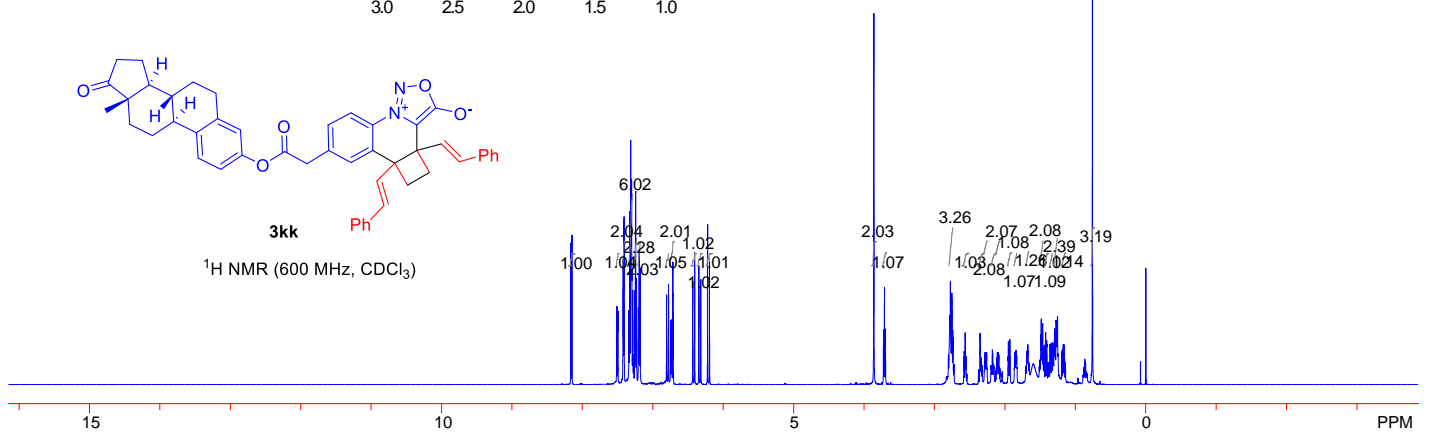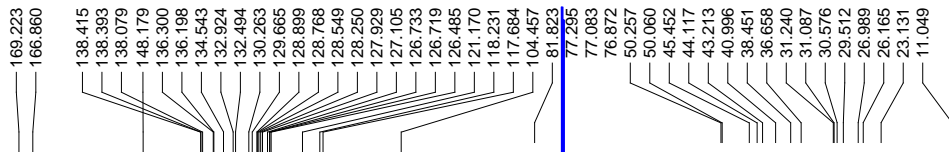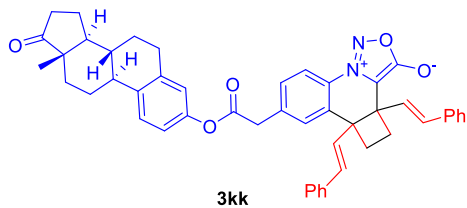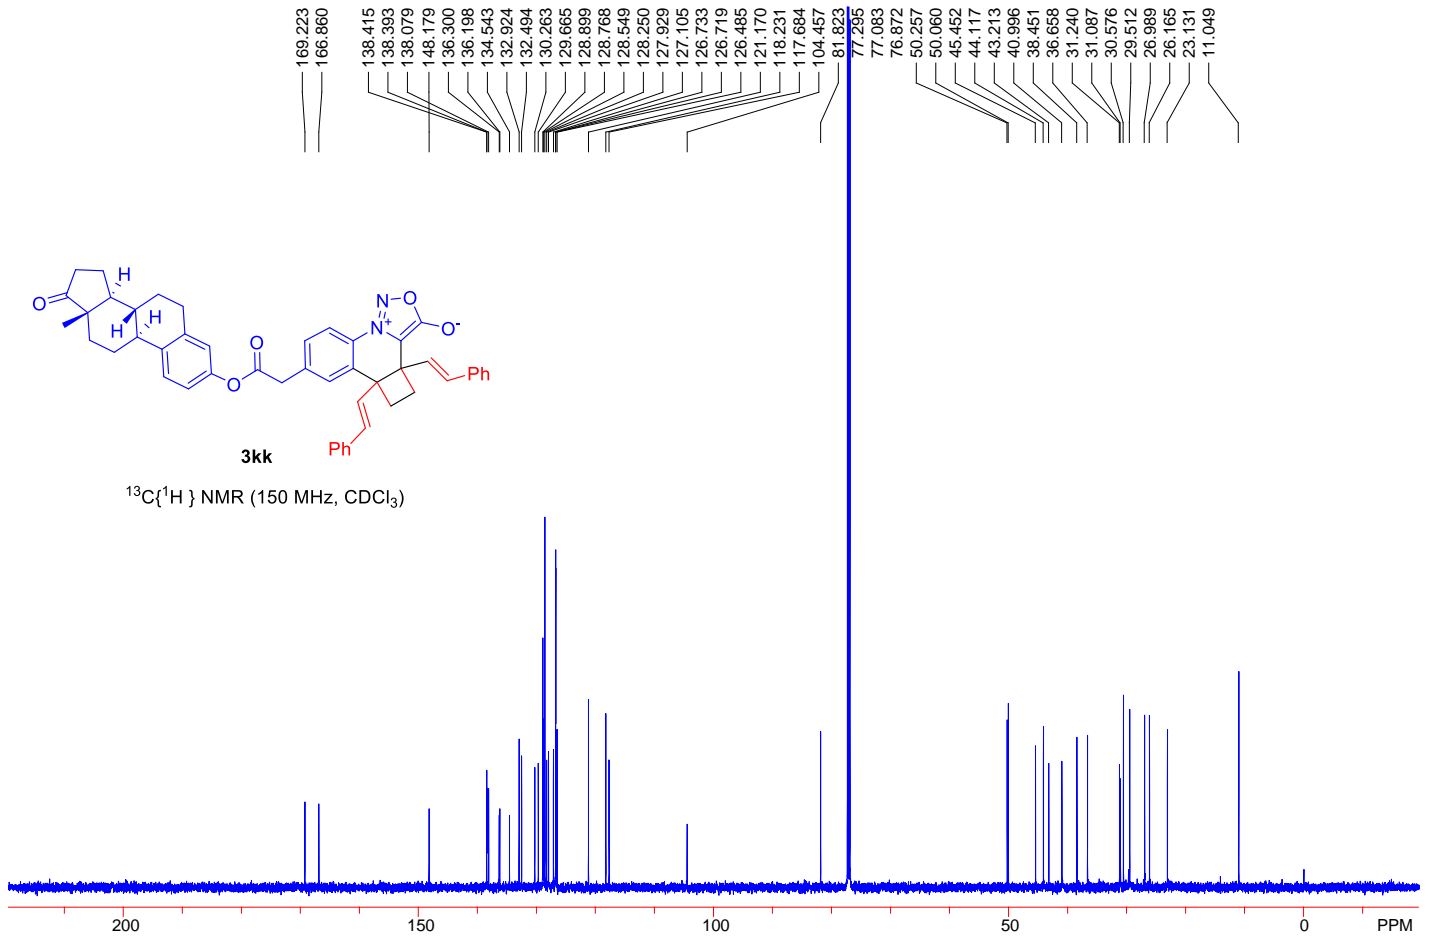

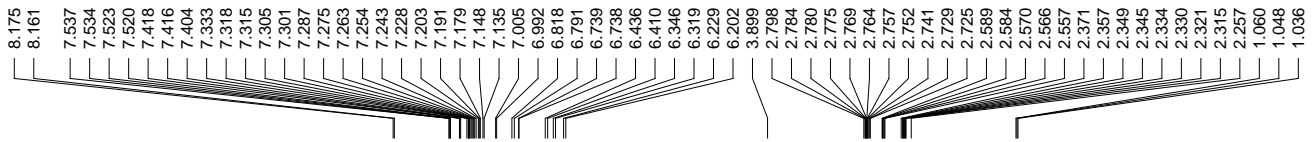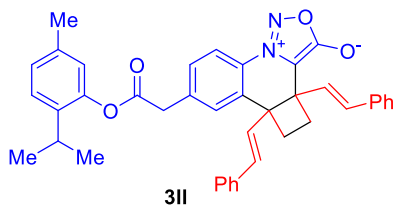

$^1\text{H}$  NMR (600 MHz,  $\text{CDCl}_3$ )

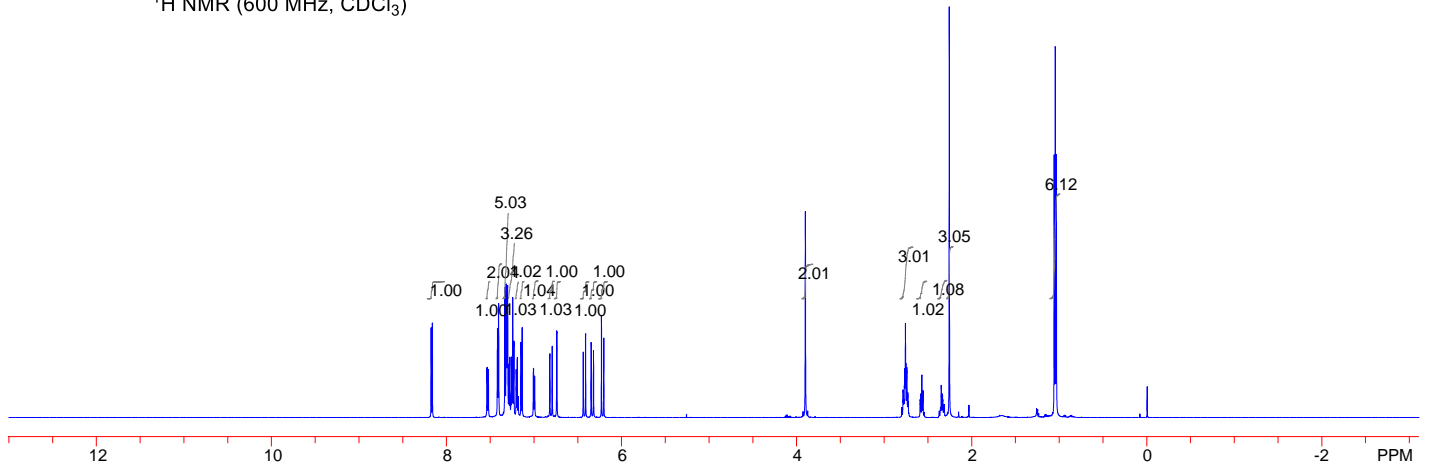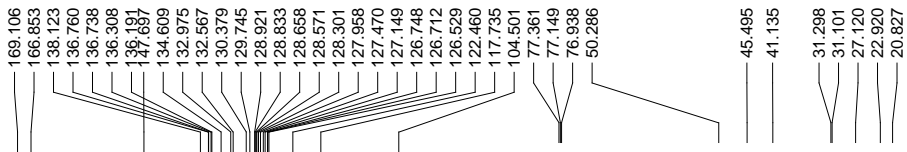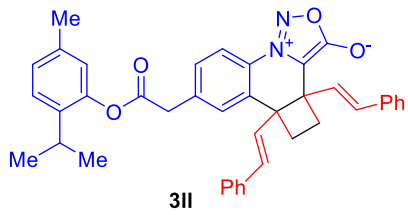

$^{13}\text{C}\{^1\text{H}\}$  NMR (150 MHz,  $\text{CDCl}_3$ )

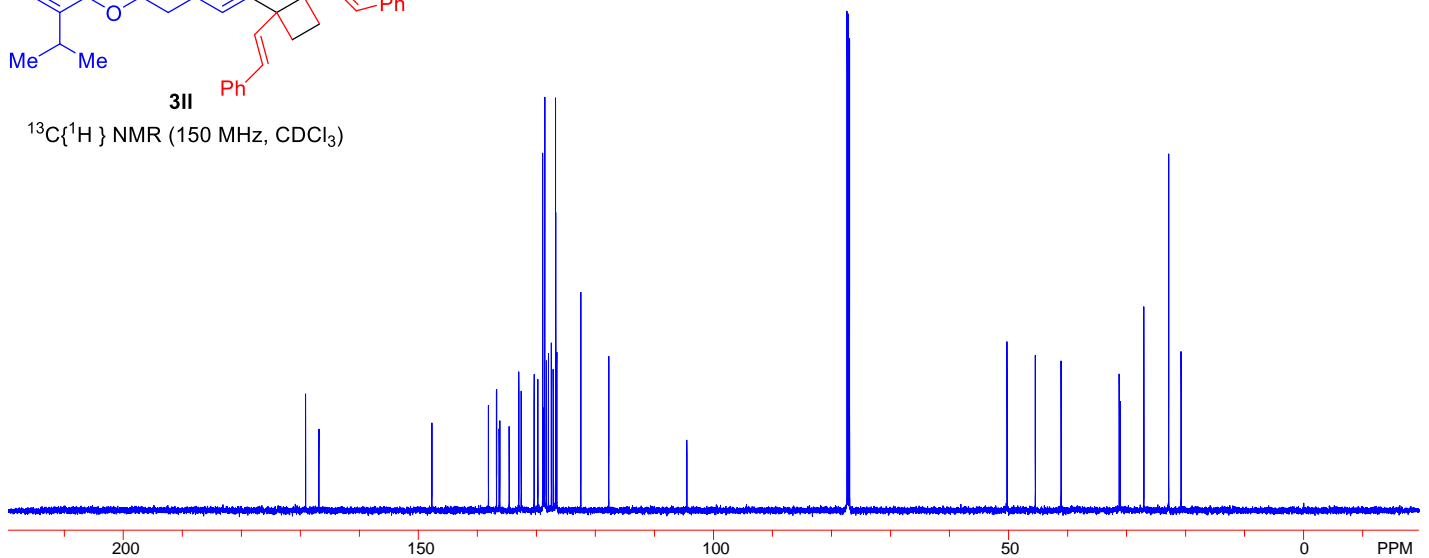

8.197  
8.183  
8.122  
8.109  
7.568  
7.555  
7.544  
7.542  
7.534  
7.531  
7.519  
7.508  
7.506  
7.479  
7.465  
7.361  
7.359  
7.348  
7.346  
7.241  
7.226  
7.212  
7.065  
7.050  
7.035  
6.932  
6.917  
6.886  
6.859  
6.611  
6.584  
6.532  
6.505  
6.424  
6.397  
3.055  
3.044  
3.032  
3.021  
3.009  
2.998  
2.850  
2.836  
2.831  
2.822  
2.814  
2.806  
2.800  
2.640  
2.626  
2.612  
2.435  
2.429  
2.423  
2.415  
2.410  
2.404  
2.329  
2.315  
1.205  
1.193  
1.191  
1.179

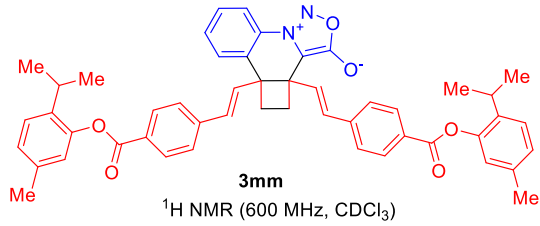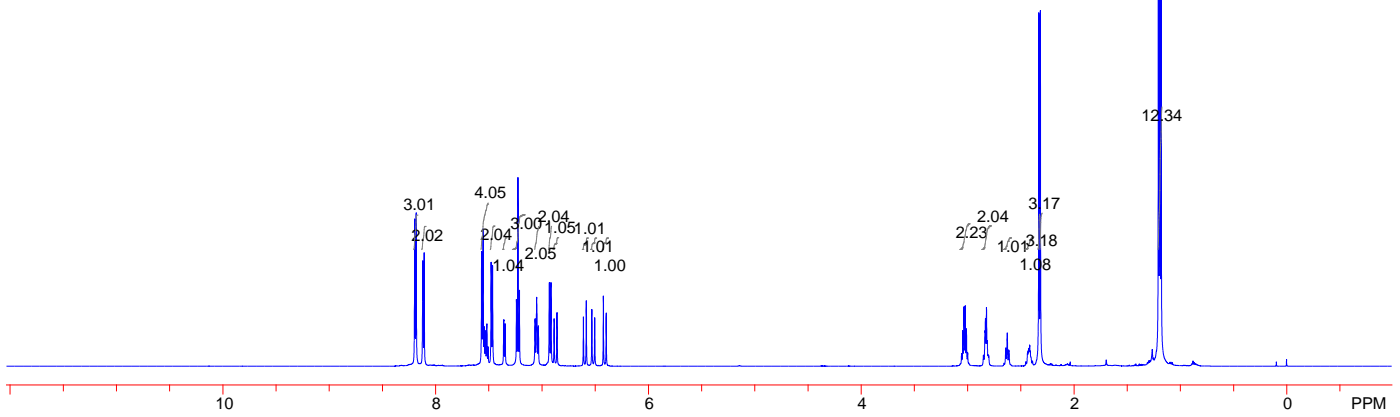

166.758  
 165.066  
 164.972  
 148.193  
 148.149  
 141.317  
 141.113  
 137.234  
 137.183  
 136.745  
 136.672  
 133.690  
 132.377  
 132.173  
 132.115  
 131.648  
 130.846  
 130.576  
 129.971  
 129.599  
 129.344  
 129.249  
 128.979  
 128.928  
 127.317  
 127.222  
 126.857  
 126.763  
 126.588  
 126.529  
 122.927  
 122.891  
 122.538  
 103.750  
 77.506  
 77.295  
 77.083  
 50.417  
 45.546  
 31.335  
 30.999  
 27.375  
 27.317  
 23.095  
 20.922  
 20.907

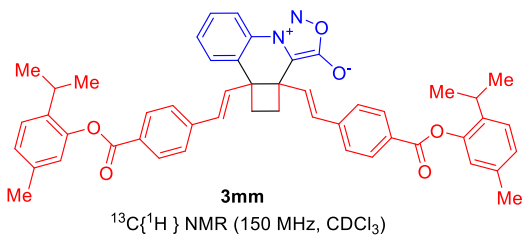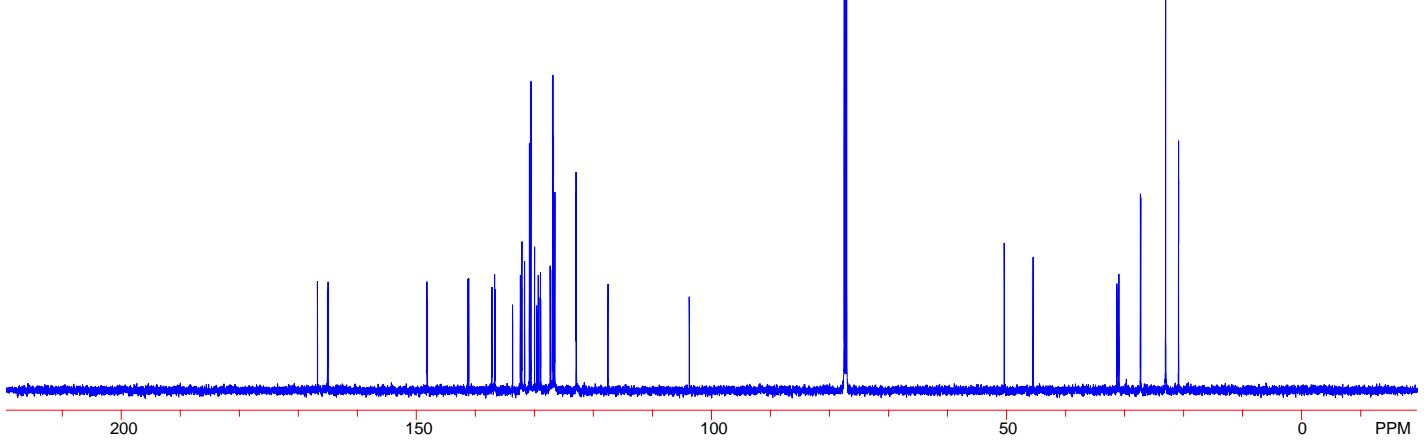

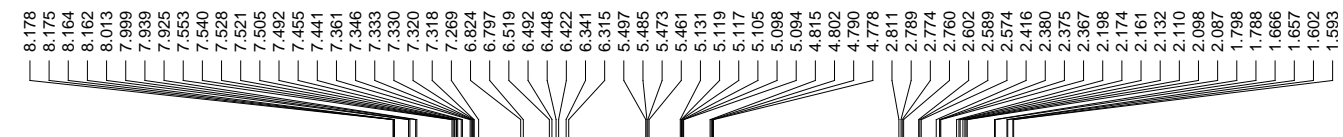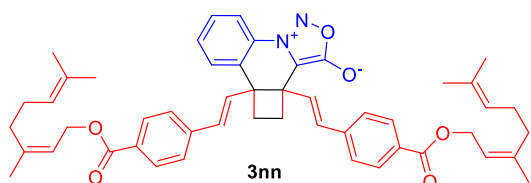

$^1\text{H}$  NMR (600 MHz,  $\text{CDCl}_3$ )

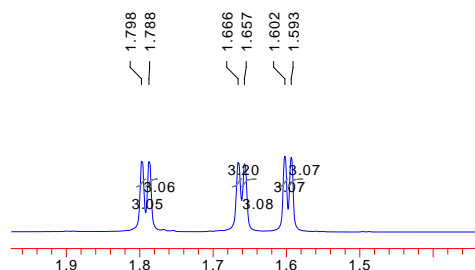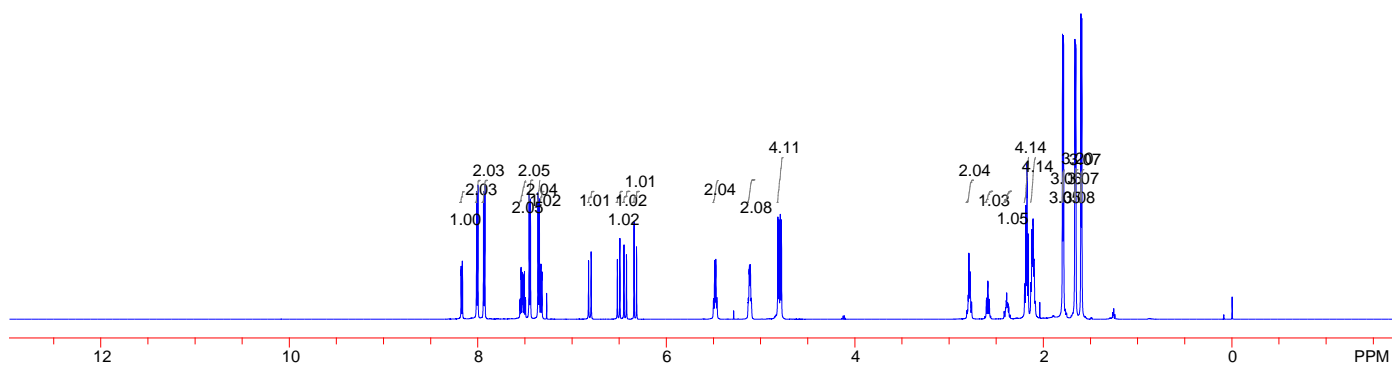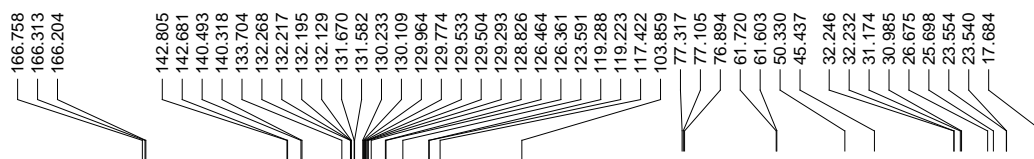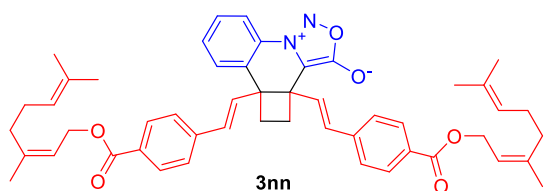

$^{13}\text{C}\{^1\text{H}\}$  NMR (150 MHz,  $\text{CDCl}_3$ )

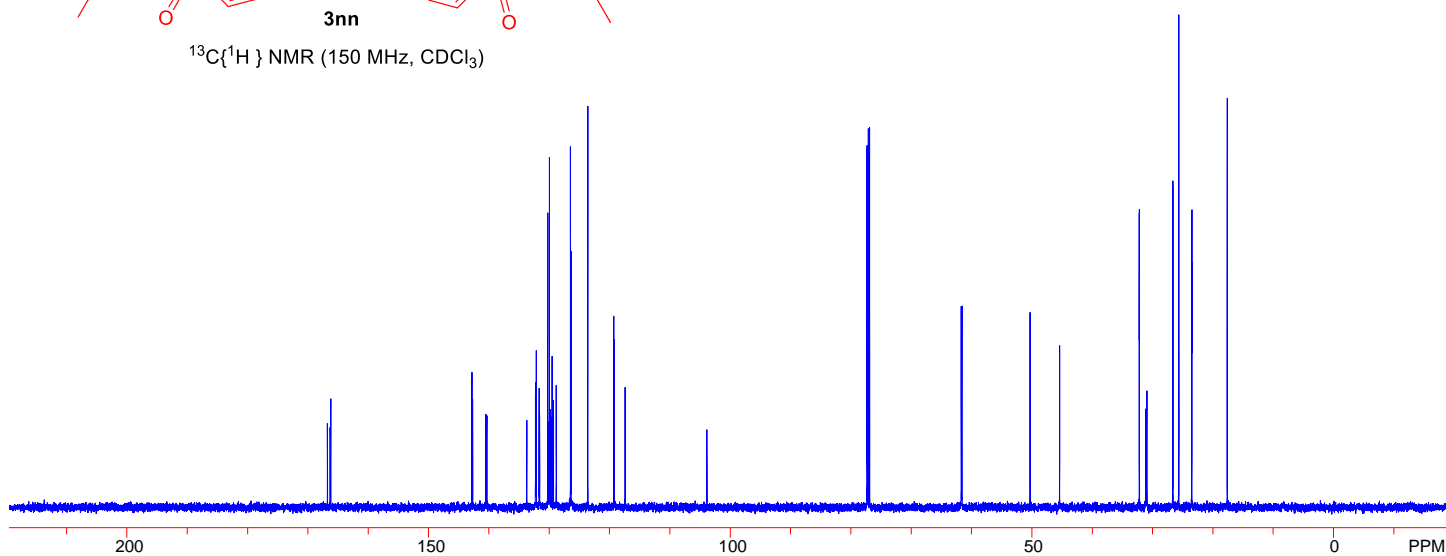

## VI. NMR spectra of 4-7

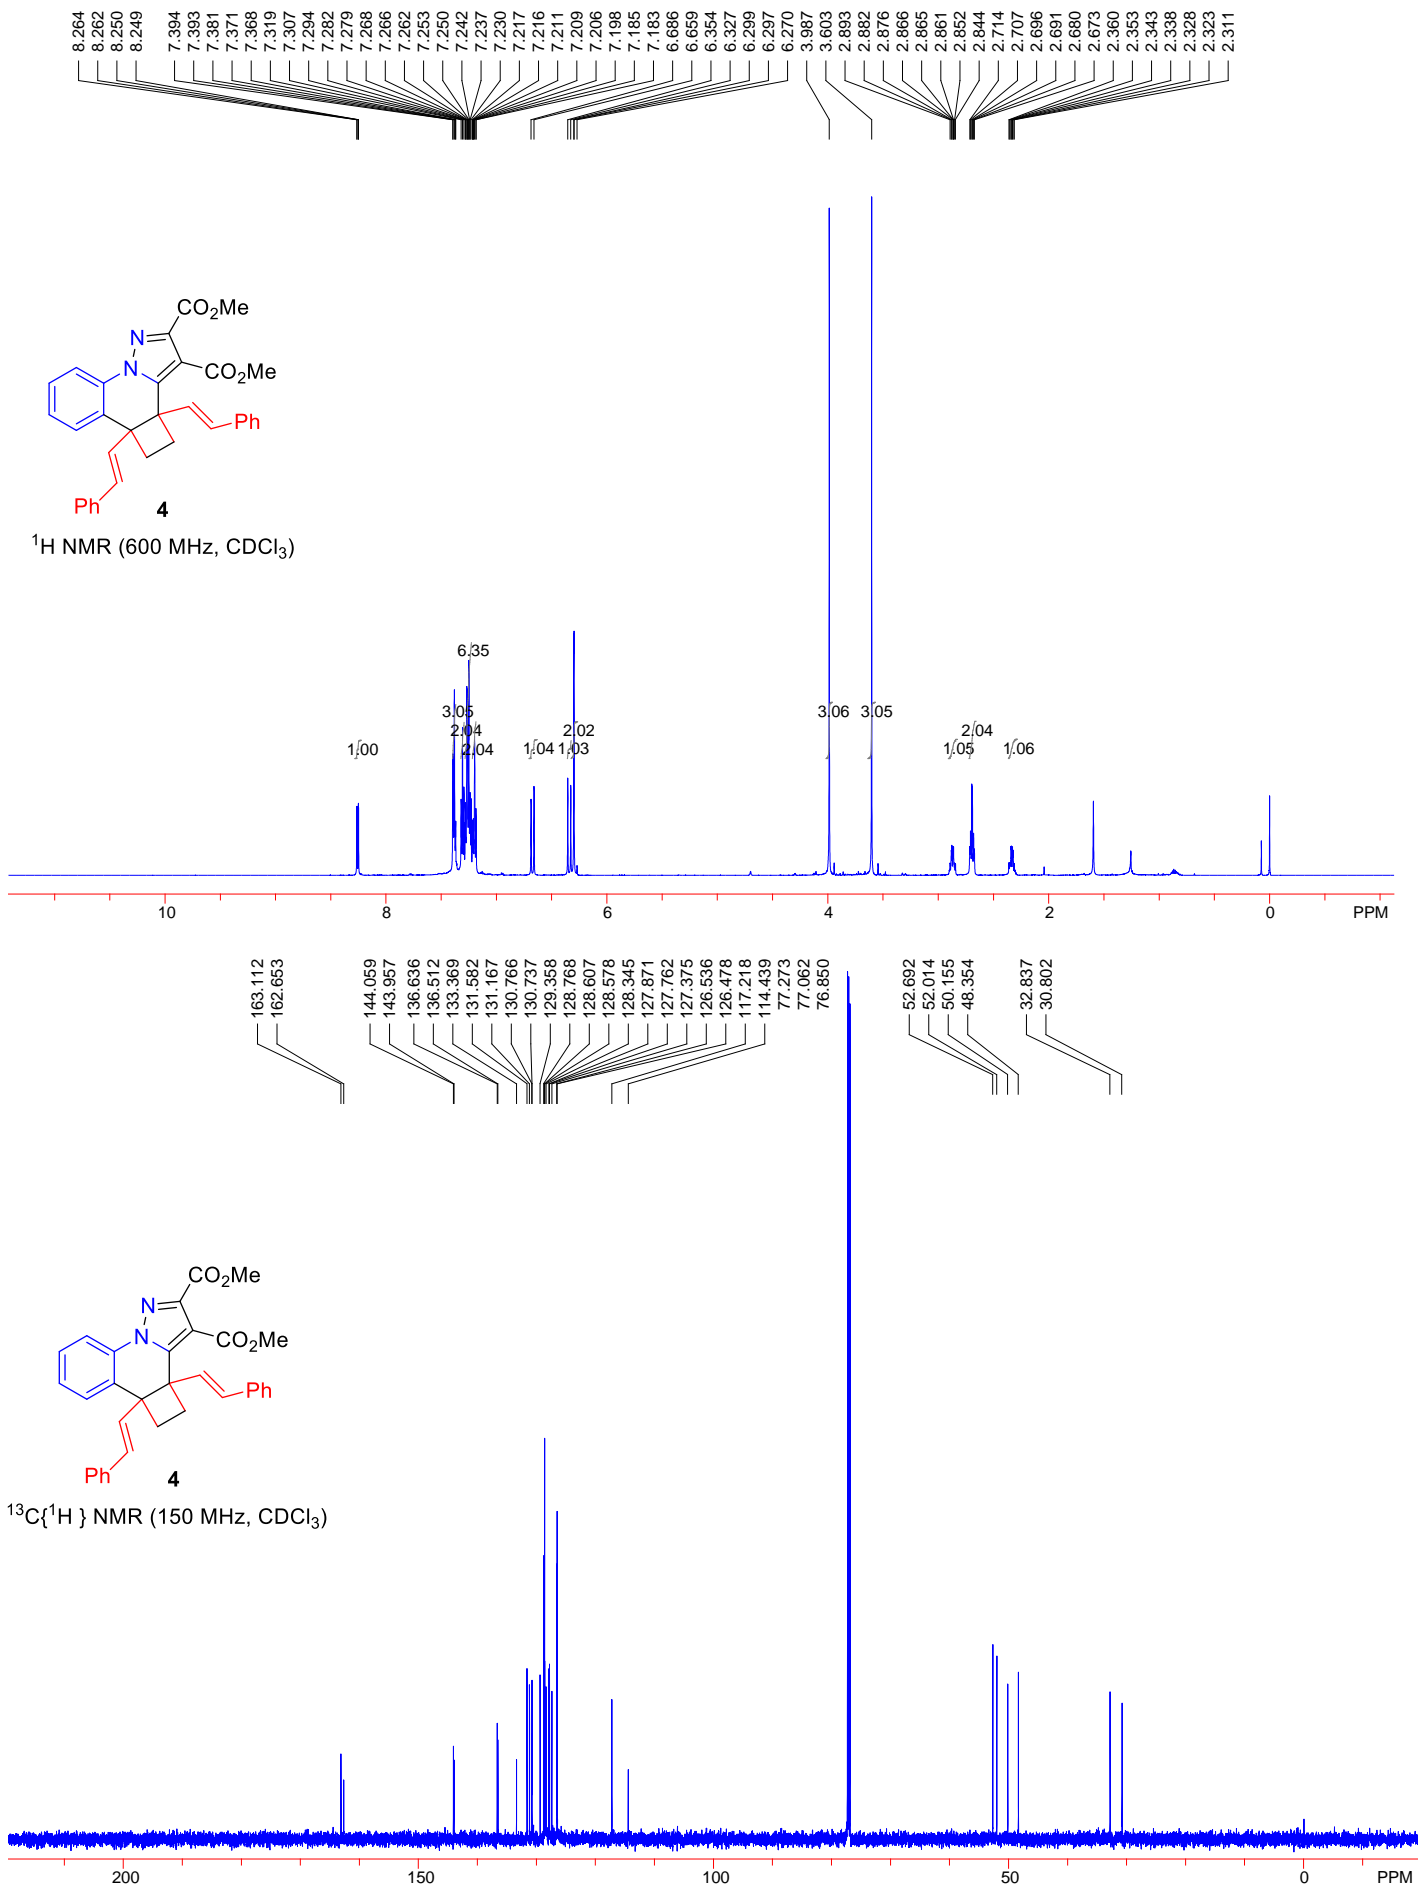

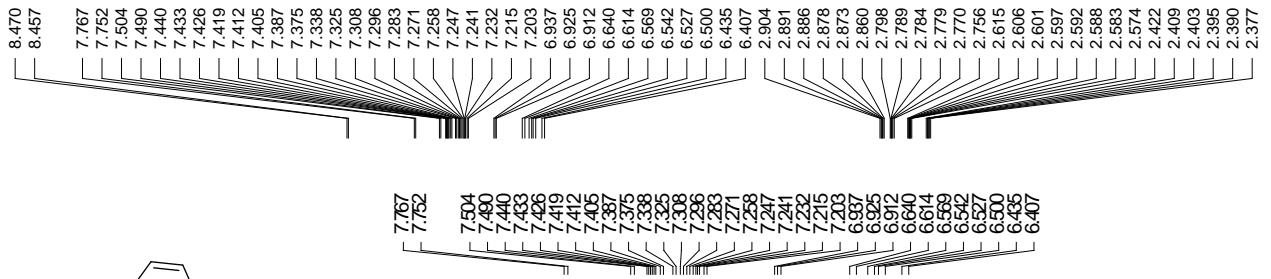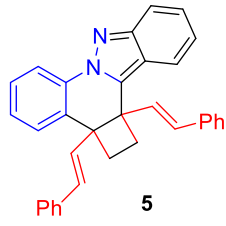

$^1\text{H}$  NMR (600 MHz,  $\text{CDCl}_3$ )

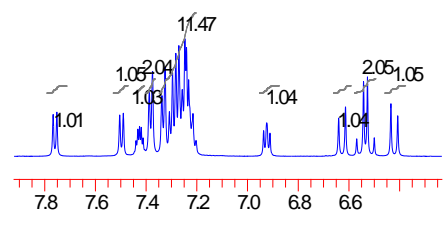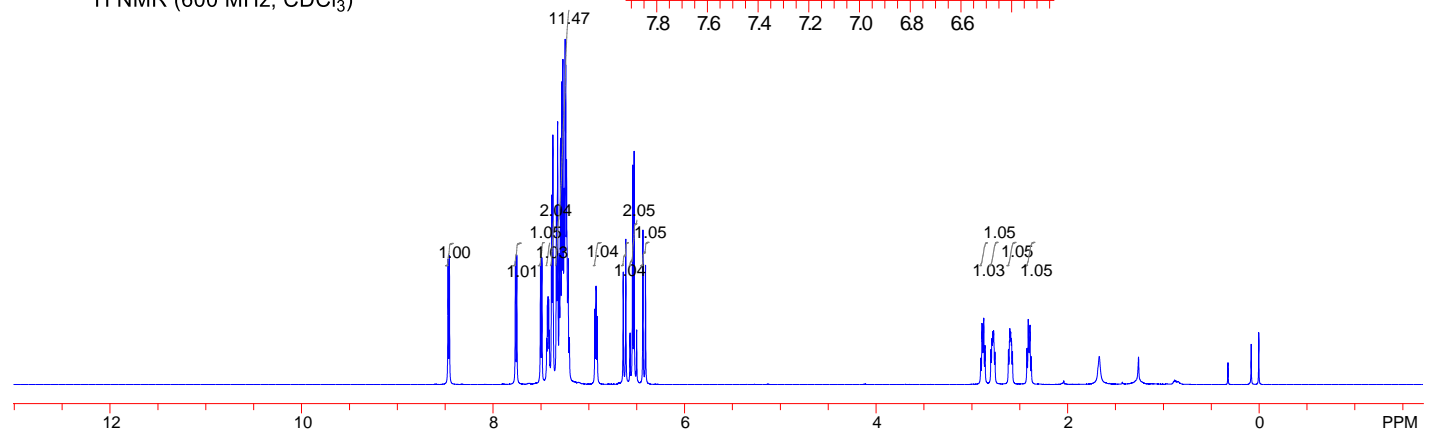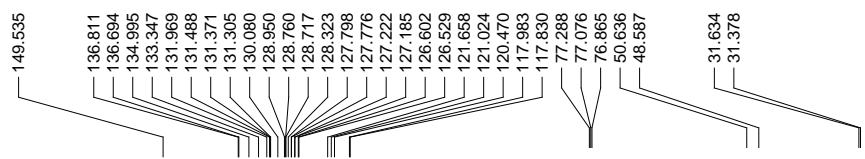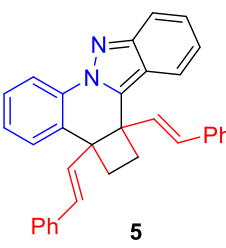

$^{13}\text{C}\{^1\text{H}\}$  NMR (150 MHz,  $\text{CDCl}_3$ )

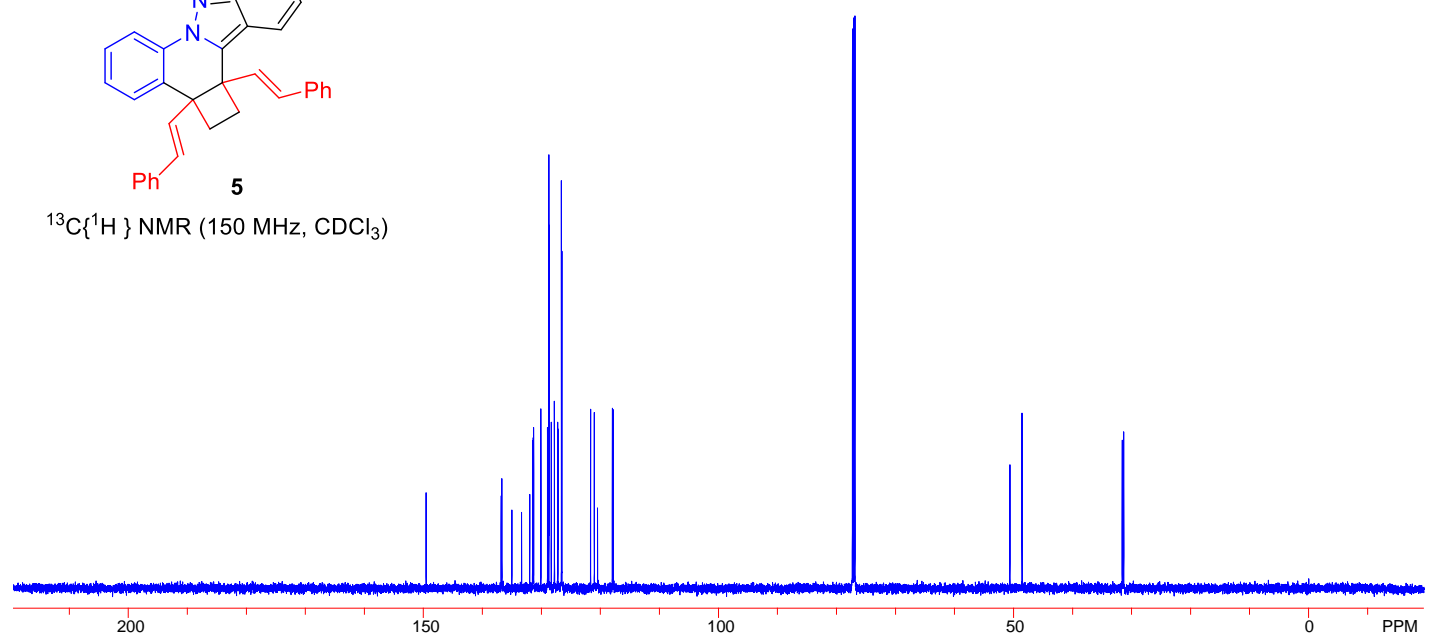



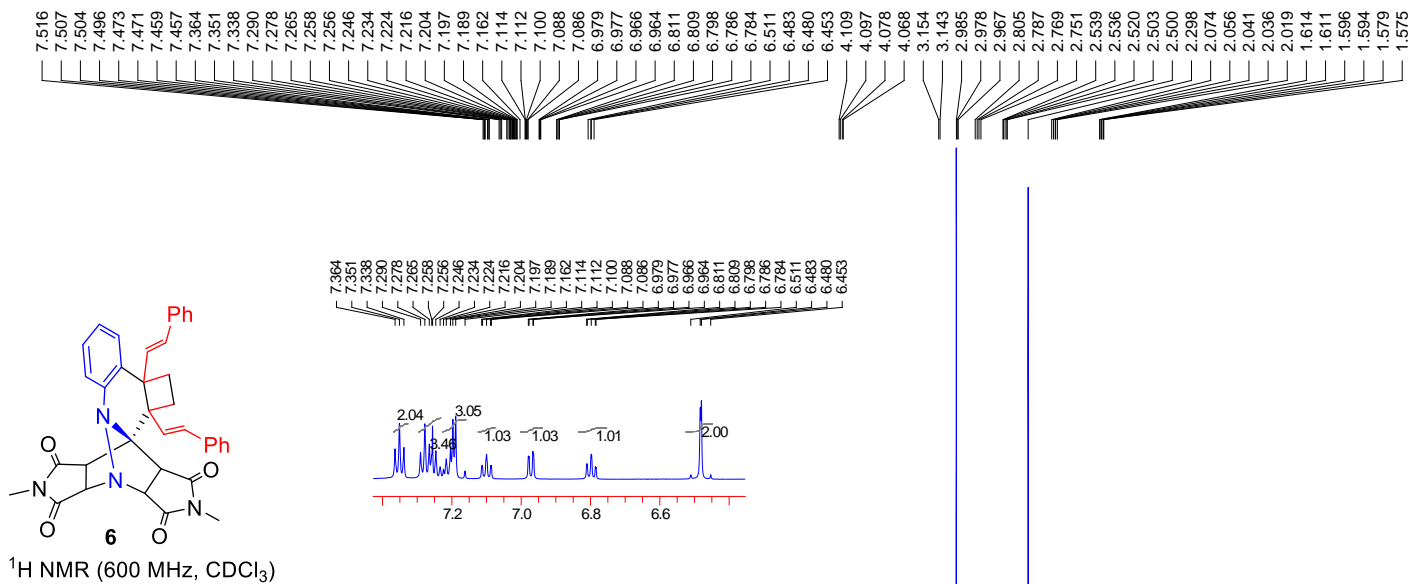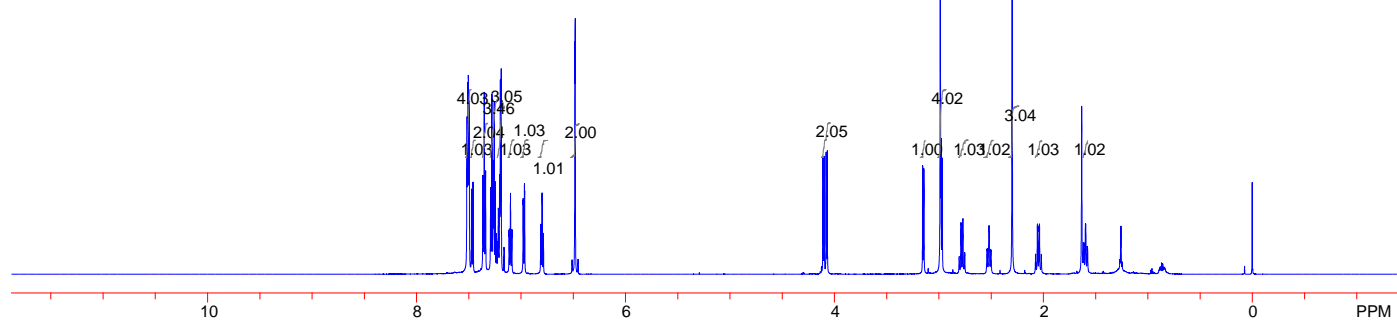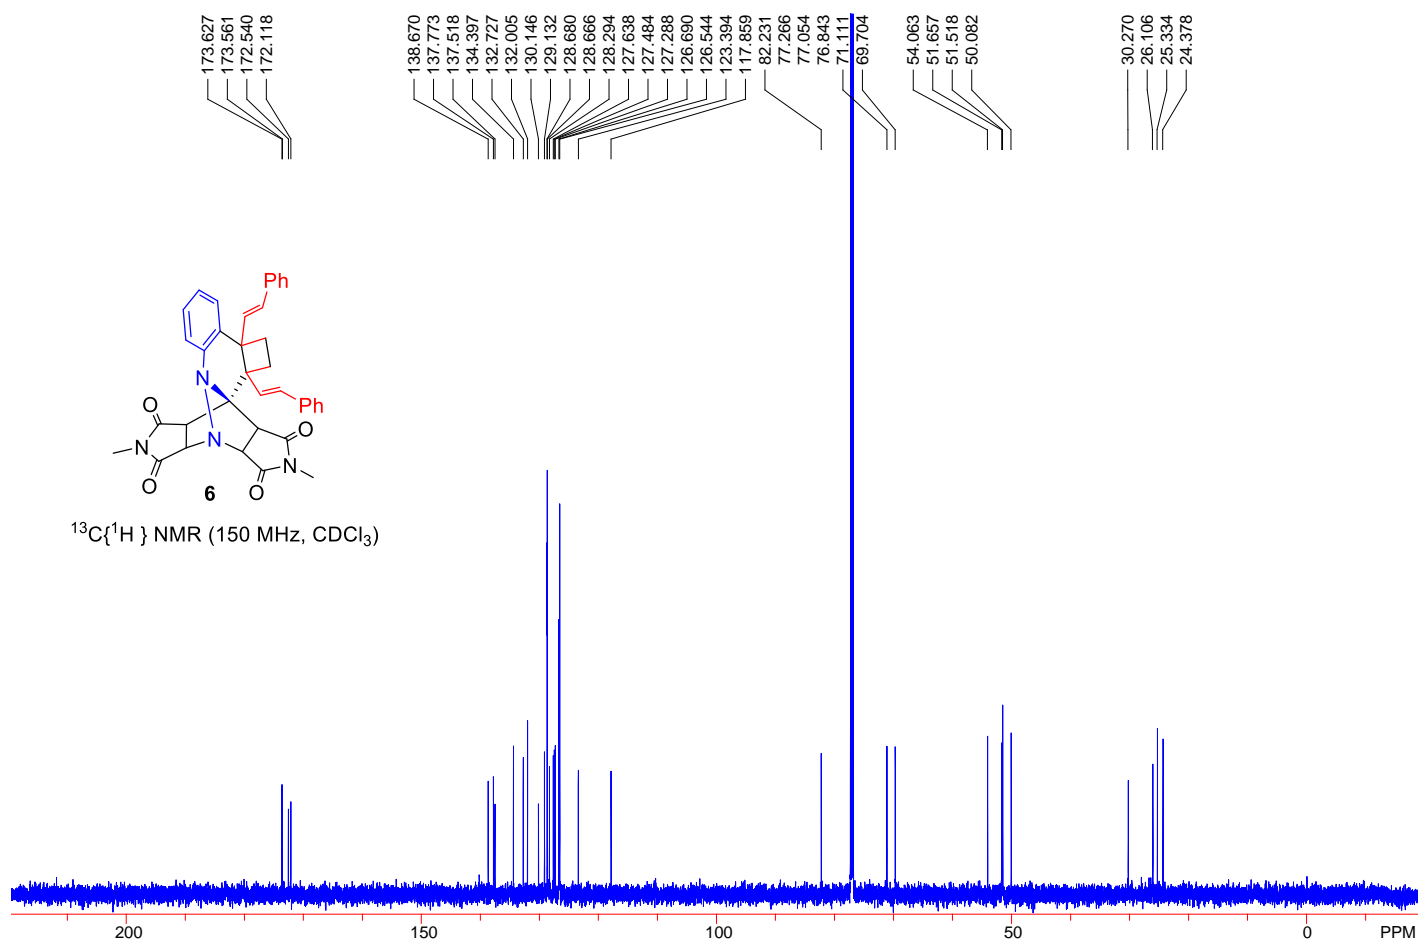

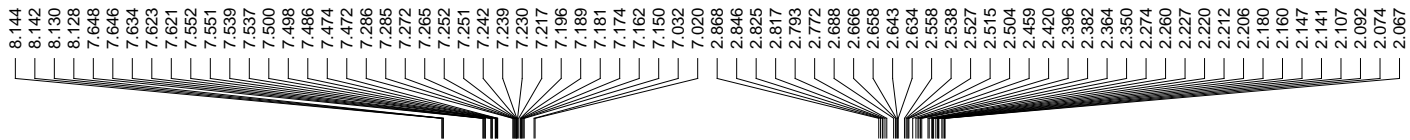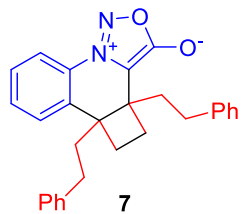

$^1\text{H}$  NMR (600 MHz,  $\text{CDCl}_3$ )

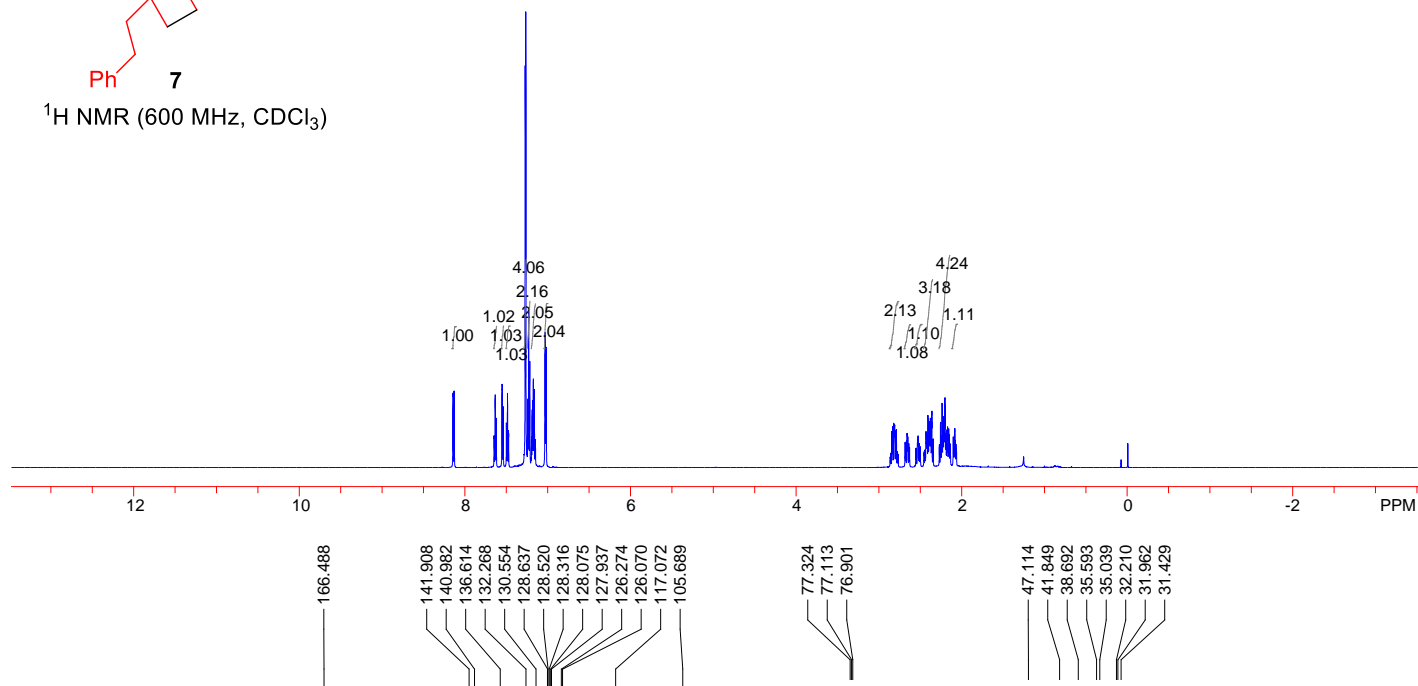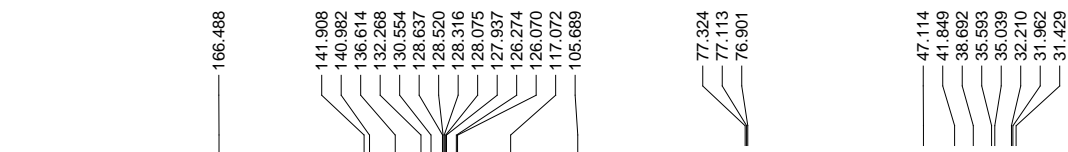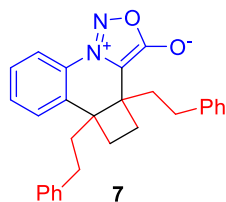

$^{13}\text{C}\{^1\text{H}\}$  NMR (150 MHz,  $\text{CDCl}_3$ )

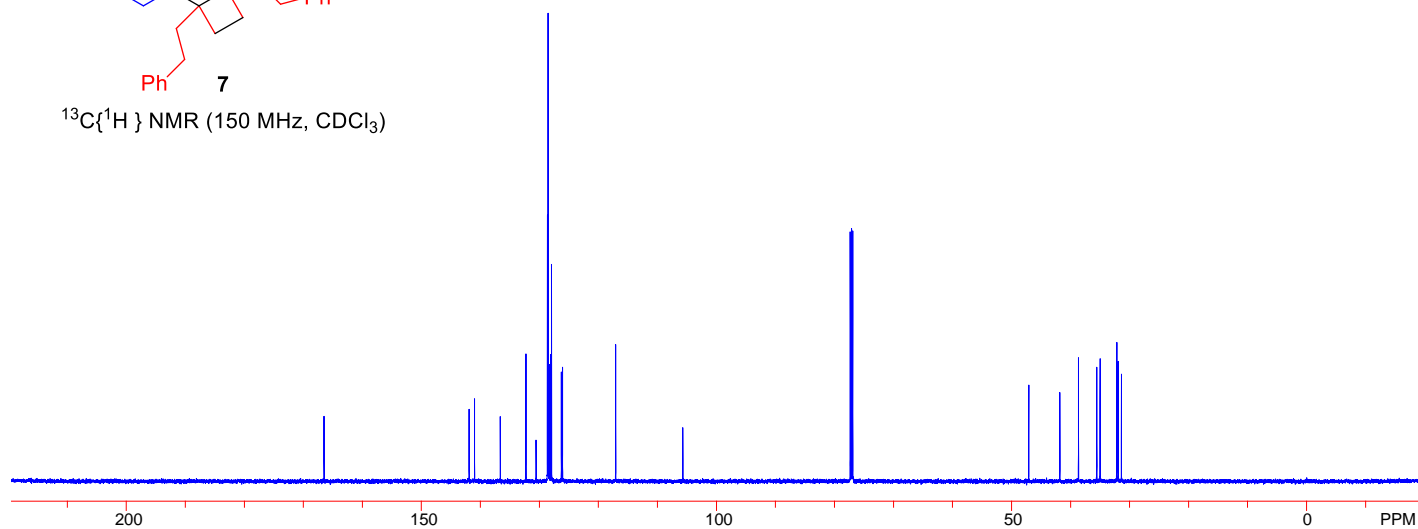

## VII. References

- [1] A. Shi, K. Sun, X. Chen, L. Qu, Y. Zhao, B. Yu, Perovskite as Recyclable Photocatalyst for Annulation Reaction of *N*-Sulfonyl Ketimines, *Org. Lett.*, 2022, **24**, 299–303.
- [2] H. Liu, D. Audisio, L. Plougastel, E. Decuypere, D.-A. Buisson, O. Koniev, S. Kolodych, A. Wagner, M. Elhabiri, A. Krzyczmonik, S. Forsback, O. Solin, V. Gouverneur, F. Taran, Ultrafast Click Chemistry with Fluorosydnone, *Angew. Chem. Int. Ed.*, 2016, **55**, 12073–12077.
- [3] A. Singh, R. K. Shukla, C. M. R. Volla. Rh(III)-Catalyzed [5+1] Annulation of 2-Alkenylanilides and 2-Alkenylphenols with Allenyl Acetates, *Chem. Sci.*, 2022, **13**, 2043–2049.
- [4] K.-I. Fujita, Y. Takahashi, M. Owaki, K. Yamamoto, R. Yamaguchi, Synthesis of Five-, Six-, and Seven-Membered Ring Lactams by Cp\*Rh Complex-Catalyzed Oxidative N-Heterocyclization of Amino Alcohols, *Org. Lett.*, 2004, **6**, 2785–2788.
- [5] L. Li, H. Wang, X. Yang, L. Kong, F. Wang, X. Li, Rhodium-Catalyzed Oxidative Synthesis of Quinoline-Fused Sydnones via 2-fold C–H Bond Activation, *J. Org. Chem.*, 2016, **81**, 12038–12045.
- [6] J. M. González, B. Cendón, J. L. Mascareñas, M. Gulías, Kinetic Resolution of Allyltriflamides through a Pd-Catalyzed C–H Functionalization with Allenes: Asymmetric Assembly of Tetrahydropyridines, *J. Am. Chem. Soc.*, 2021, **143**, 3747–3752.
